# Supplementary material for: Mechanistic studies for dirhodium-catalyzed ring expansion reactions
Source: Royal Society of Chemistry journal article supplement (doi:10.1039/c6qo00713a), 2017-01-01
Supplement: c6qo00713a1.pdf [file c6qo00713a1.pdf]

## Mechanistic Studies for Dirhodium-Catalyzed Ring Expansion Reactions

Yin Wei,<sup>a\*</sup> Xu-Bo Hu,<sup>b</sup> Kai Chen,<sup>b</sup> Min Shi,<sup>a,b</sup>

<sup>a</sup>State Key Laboratory of Organometallic Chemistry, University of Chinese Academy of Sciences,  
Shanghai Institute of Organic Chemistry, Chinese Academy of Sciences, 345 Lingling Road,  
Shanghai 200032 China

<sup>b</sup>Laboratory for Advanced Materials & Institute of Fine Chemicals, School of Chemistry &  
Molecular Engineering, East China University of Science and Technology, 130 Meilong Road,  
Shanghai 200237, P. R. China

### Supporting Information

1. The total energies, enthalpies and free energies of the lowest conformers of all species shown in Scheme 3 (Table S1) and archive entries.....S2
2. Solvation Gibbs free energy profiles for catalyzed and uncatalyzed N<sub>2</sub> extrusion using substrates **3a** and **3b**.....S13
3. The Gibbs free energy profile for the reaction of **1a** having three-member ring calculated at B3PW91-D3/BS1//BPW91-D3/BS1 level.....S16
4. The total energies, enthalpies and free energies of the lowest conformers of all species shown in Scheme 4 (Table S2) and archive entries.....S17
5. The total energies, enthalpies and free energies of the lowest conformers of all species shown in Scheme 5 (Table S3) and archive entries.....S40
6. The total energies, enthalpies and free energies of the lowest conformers of all species shown in Scheme 6 (Table S4) and archive entries.....S42
7. The total energies, enthalpies and free energies of the lowest conformers of all species shown in Scheme 7 (Table S5) and archive entries.....S70
8. The total energies, enthalpies and free energies of the lowest conformers of all species shown in Scheme 8 (Table S6) and archive entries.....S73
9. The total energies, enthalpies and free energies of the lowest conformers of all species shown in Scheme 9 (Table S7) and archive entries.....S102

The total energies, enthalpies and free energies of the lowest conformers of all species shown in Scheme 3 and archive entries

Table S1<sup>a</sup>

|                                        | $E_{\text{tot}} (E_{\text{h}})$ | $H_{298, \text{toluene}}$ | $G_{298, \text{toluene}}$ | # of imaginary frequencies       |
|----------------------------------------|---------------------------------|---------------------------|---------------------------|----------------------------------|
| <b>1a</b>                              | -781.7926124                    | -781.5330448              | -781.5959628              | 0                                |
| <b>Rh<sub>2</sub>(esp)<sub>2</sub></b> | -2067.153012                    | -2066.450934              | -2066.56452               | 0                                |
| <b>IN1</b>                             | -2848.952860                    | -2847.986559              | -2848.142651              | 0                                |
| <b>TS1</b>                             | -2848.917718                    | -2847.9545                | -2848.107292              | 1<br>(-586.10 cm <sup>-1</sup> ) |
| <b>N<sub>2</sub></b>                   | -109.5462206                    | -109.5375433              | -109.5593163              | 0                                |
| <b><sup>1</sup>IN2</b>                 | -2739.421785                    | -2738.467887              | -2738.617711              | 0                                |
| <b><sup>3</sup>IN2</b>                 | -2739.424139                    | -2738.470662              | -2738.622242              | 0                                |
| <b>TS1'</b>                            | -781.7268584                    | -781.4690828              | -781.5334438              | 1<br>(-277.80 cm <sup>-1</sup> ) |
| <b><sup>3</sup>IN2'</b>                | -672.2286479                    | -671.9801546              | -672.0390496              | 0                                |

a. SMD/BPW91/BS2// BPW91/BS1

## 1a

```
1\1\GINC-SHI_02\SP\RBPW91\6-311++G(d,p)\C16H13N3\YIN\15-Mar-2016\0\#\p
  bpw91/6-311++g(d,p) geom=check scrf=(iefpcm,smd,solvent=toluene)\Title
  Card Required\0,1\C,0,-0.0023485306,0.0360867041,0.03562248\C,0,-0
  .0084789161,0.0479425228,1.4362587764\C,0,1.1979357037,-0.0174681683,2
  .1706665352\C,0,2.4096835348,-0.1086255703,1.4475946679\C,0,2.41444829
  51,-0.1234839743,0.0486084639\C,0,1.208602017,-0.0493595873,-0.6663728
  184\H,0,-0.9495415748,0.0958155598,-0.5085951437\H,0,-0.9582219218,0.1
  192722393,1.9722977974\H,0,3.3520306708,-0.1837618145,1.9939911368\H,0
  ,3.3652161185,-0.2023119963,-0.487115092\H,0,1.2135464249,-0.063749180
  4,-1.7599891341\C,0,1.1821437068,0.0250389938,3.6595367132\C,0,-0.0269
  898379,-0.4987859862,4.3720008572\C,0,-0.4418175379,-1.8291519383,4.15
  61870892\C,0,-0.7848457216,0.2877868143,5.2777408067\C,0,-1.5401169975
  ,-2.3800083962,4.826276524\H,0,0.127749943,-2.4384931909,3.4493226003\
  C,0,-1.8927242075,-0.2627312217,5.9552150585\C,0,-2.2650754172,-1.5910
  21202,5.7326533572\H,0,-1.8269951141,-3.4190717767,4.6449226715\H,0,-2
  .4647337822,0.358404472,6.6505702835\H,0,-3.1261185676,-2.0052439701,6
  .2643361438\N,0,-0.3883335242,1.6439819287,5.4408259995\N,0,-1.0386865
  936,2.3822869339,6.1972078342\N,0,-1.5300124673,3.195609106,6.85895384
  48\C,0,2.2244423418,0.4837141969,4.3800507666\C,0,3.560781222,1.103998
  1796,4.4207790947\C,0,2.7861237016,0.7627648361,5.7095659111\H,0,4.446
  3702213,0.502084238,4.1831045998\H,0,3.6588552472,2.1590121371,4.13699
  22682\H,0,3.1483405325,-0.0737861368,6.3198543253\H,0,2.368062747,1.58
  94803569,6.294472043\Version=EM64L-G09RevA.01\State=1-A\HF=-781.79261
  24\RMSD=9.857e-09\Dipole=0.2189899,-0.7859736,-0.1260746\Quadrupole=5.
  4236298,-5.4497748,0.026145,4.3688719,-0.4582425,-3.2108245\PG=C01 [X(
  C16H13N3)]\@
```

## Rh<sub>2</sub>(esp)<sub>2</sub>

```
1\1\GINC-SHI_02\SP\RBPW91\GenECP\C32H40O8Rh2\YIN\30-May-2016\0\#\p gen
  ecp bpw91 scrf=(iefpcm,smd,solvent=toluene) geom=check\Title Card Req
  uired\0,1\Rh,0,0.0117594004,0.027178925,0.0648508413\Rh,0,-0.05353200
  94,-0.0150636784,2.4394589352\O,0,2.0574203324,0.0586774848,0.15749510
  73\C,0,2.6239699594,0.0349254493,1.3107080884\O,0,2.0068462481,-0.0053
  412913,2.4410471887\O,0,0.0719380139,-2.0322396886,0.0852267503\C,0,0.
  0406930091,-2.6387033271,1.2216094517\O,0,-0.0145475156,-2.0614466853,
  2.368413068\O,0,-2.0486307141,0.0174254504,0.0633002225\C,0,-2.6657303
  77,-0.0226023189,1.1936609857\O,0,-2.0991577998,-0.0462984256,2.346864
  1837\O,0,-0.0272271467,2.0735554395,0.1358503548\C,0,-0.0821520277,2.6
  508208458,1.2826677448\O,0,-0.1133896391,2.0443564154,2.4190536492\C,0
  ,4.1670590849,0.0315697803,1.3538251484\C,0,-0.1382183283,4.1932283839
  ,1.3093227088\C,0,4.7532757176,0.1001424335,-0.0688056271\H,0,5.855012
  5985,0.081190246,-0.012461672\H,0,4.4252908056,-0.7586888917,-0.673875
  4036\C,0,-0.0743368314,4.7667181465,-0.1187131476\H,0,-0.9150743359,4.
```

4035581124,-0.7290805488\H,0,-0.1311204809,5.8676989374,-0.0743320649\  
C,0,1.04276136,4.7436301295,2.1888195977\H,0,0.9579677889,5.8449131077  
,2.1768926099\H,0,0.8702977036,4.4164334882,3.2274751528\C,0,-1.471726  
2492,4.6083236857,1.9821165002\H,0,-1.5539834488,4.1904050271,2.996826  
2474\H,0,-1.528207492,5.7078085898,2.049255093\H,0,-2.3356308897,4.261  
8779143,1.3914341141\C,0,4.6198474091,-1.2800498057,2.0451030823\H,0,5  
.7198432612,-1.2985040465,2.1240867951\H,0,4.1942255745,-1.3658812398,  
3.0563090081\H,0,4.309081798,-2.1612972486,1.4602225754\C,0,4.66764729  
98,1.2395930662,2.2263190777\H,0,4.3353113052,1.0668919806,3.263305041  
9\H,0,5.7712405053,1.1922313114,2.2267163619\C,0,0.0971633791,-4.18113  
32698,1.1950286204\C,0,-4.2088221483,-0.0190387636,1.1506365876\C,0,-1  
.0845884864,-4.7316764254,0.3165935749\H,0,-0.9999227642,-5.8329723136  
,0.3287527109\C,0,-4.7095274275,-1.2278223377,0.2791938016\H,0,-5.8131  
286859,-1.1805693008,0.2790674002\H,0,-4.3775505565,-1.0558186562,-0.7  
580298112\C,0,-4.2438804323,-2.5962676524,0.7377185053\C,0,-5.00093073  
86,-3.3907842072,1.6209259343\C,0,-3.0028374427,-3.089221456,0.2947441  
523\C,0,-4.5104516735,-4.6301115211,2.0579404612\H,0,-5.9819988812,-3.  
0429606863,1.9596409254\C,0,-2.4728476431,-4.3081469433,0.7559907279\H  
,0,-2.4251442459,-2.4992052935,-0.4208576655\C,0,-3.2506162997,-5.0826  
339509,1.638986548\H,0,-5.1136277304,-5.2469488444,2.7308379195\H,0,-2  
.8733668716,-6.0477601654,1.9917158361\C,0,1.4300546309,-4.5960710232,  
0.5209837187\H,0,2.2945019123,-4.2496016037,1.1108573137\H,0,1.4865720  
963,-5.6955502008,0.4537236611\H,0,1.5113321978,-4.1780801654,-0.49377  
25401\C,0,0.0346864737,-4.7545534536,2.6231446917\H,0,0.0917636017,-5.  
8555308519,2.5787807909\H,0,0.8758872801,-4.3911334887,3.232743873\H,0  
, -0.897640624,-4.4740590394,3.1338500809\C,0,-4.6616126094,1.291952556  
3,0.4582469959\H,0,-5.7615991489,1.3102633866,0.379084232\H,0,-4.35101  
23299,2.1737121717,1.0424456914\H,0,-4.2358453281,1.3770153136,-0.5529  
59562\C,0,-4.7949451456,-0.086363993,2.5733634884\H,0,-4.4668348283,0.  
7729543884,3.1776966194\H,0,-5.896692322,-0.0673220168,2.5170757527\H,  
0,-4.4883735271,-1.0032926312,3.0968018538\H,0,-0.9129015146,-4.404771  
8757,-0.7222917936\H,0,4.4466630074,1.0174870729,-0.5914961468\H,0,0.8  
583889663,4.4860004571,-0.6285852982\C,0,2.4314033704,4.3204116565,1.7  
503349034\C,0,2.9609947337,3.1011300767,2.2111117308\C,0,3.2098427089,  
5.0955225172,0.8684978696\C,0,4.2023246258,2.6084575406,1.7686648823\H  
,0,2.3827503459,2.5106652002,2.9258818006\C,0,4.469996606,4.6432797758  
,0.4501713339\H,0,2.8328479,6.0609105994,0.5161963693\C,0,4.9600642846  
,3.4035864786,0.8866012317\H,0,5.073699663,5.2605716634,-0.2218360776\  
H,0,5.941340531,3.0559180975,0.5483127226\\Version=EM64L-G09RevA.01\St  
ate=1-A\HF=-2067.1530118\RMSD=7.767e-09\Dipole=-0.0001676,-0.0001396,-  
0.0001866\Quadrupole=6.922707,6.3658689,-13.2885759,-7.3033178,-2.6920  
829,-3.0745509\PG=C01 [X(C32H40O8Rh2)]\@

INI

1\1\GINC-A746\FOpt\RBPW91\GenECP\C48H53N3O8Rh2\SIOC001\14-Apr-2016\0\  
#p opt genecp bpw91\Title Card Required\0,1\Rh,0.0301761711,-0.00110  
8082,-0.0503043766\Rh,-0.0296614394,-0.0858230144,2.34974897\O,2.07303  
67641,-0.0517734319,0.015847706\C,2.6532514201,-0.1064428797,1.1566354  
699\O,2.0533664758,-0.1472025466,2.2978139083\O,-0.015485761,-2.058426  
0099,-0.0847019723\C,-0.0788737638,-2.6892597154,1.0346394173\O,-0.093  
799036,-2.1464743308,2.1980654844\O,-2.0258279591,0.0883523198,-0.0437  
084694\C,-2.6465652864,0.0570762663,1.081501434\O,-2.0903218448,-0.023  
777318,2.2379767601\O,0.0895050987,2.0441387646,0.0720072963\C,0.05461  
47401,2.6033362756,1.2243709855\O,-0.0022807621,1.980650066,2.35228034  
86\C,0.4906174196,-1.030304756,5.5839302963\C,0.0071374581,-1.24484036  
15,6.9005168731\C,1.6151128827,-1.7296191279,5.1070543607\C,-1.2483304  
991,-0.6193858227,7.4409383786\C,0.7240509216,-2.1425681507,7.71958689  
65\C,2.2869150241,-2.6309405168,5.938393161\H,1.9546781957,-1.53635508  
44,4.0894327189\C,1.848116176,-2.8348255217,7.2550103418\H,0.363698272  
8,-2.3040660214,8.7394420566\H,3.1618756318,-3.1647364856,5.5572579813  
\H,2.3708848306,-3.533437547,7.9137470991\N,-0.1061845605,-0.119335799  
1,4.6424097199\C,-1.1415172696,0.3864441026,8.5321423102\C,0.108000318  
4,0.9633749996,8.8594831059\C,-2.276128514,0.8099093146,9.2653643058\C  
,0.2186292999,1.926416568,9.8714498349\H,1.002462516,0.654503947,8.312  
8742917\C,-2.1636125436,1.7698451524,10.2757919769\H,-3.2517047438,0.3  
753745343,9.0404362326\C,-0.9157065532,2.3358147687,10.5857693267\H,1.  
19769844,2.358087087,10.0991459468\H,-3.0563266914,2.076842245,10.8288  
08849\H,-0.8305590359,3.0860455238,11.3769427425\C,4.1982314245,-0.148  
4836947,1.1706818647\C,0.0580348612,4.1468701548,1.2777180334\C,4.7562  
99054,-0.0320439641,-0.260765102\H,5.8583157713,-0.0785963875,-0.23011  
16905\H,4.3945603095,-0.8551447283,-0.8954151006\C,1.2529292191,4.6403  
804255,2.170891692\H,1.2037043119,5.7437922279,2.1829488999\H,1.068811  
3268,4.2971988655,3.2023780465\C,-1.2641368415,4.6020971063,1.94654866  
03\H,-1.365894468,4.1831147352,2.9586966551\H,-1.2859287209,5.70268441  
18,2.0180483692\H,-2.1358886003,4.286361092,1.3499791925\C,4.635666149  
1,-1.5006653611,1.78897359\H,5.7368801784,-1.5595460603,1.8142036895\H  
,4.260007659,-1.6104814872,2.8175673645\H,4.2660696543,-2.3486711469,1  
.1893572678\C,4.7500357204,1.0061612846,2.0813844066\H,4.4212727803,0.  
8090245885,3.1152818205\H,5.8512247556,0.919372843,2.0695276508\C,-0.1  
144298765,-4.2332686794,0.9649283514\C,-4.1881647189,0.1466795016,1.02  
52864847\C,-1.3076134199,-4.6904044308,0.0505871593\H,-1.2809274894,-5  
.7944480953,0.0243145125\C,-4.7428730771,-0.998124049,0.1028261604\H,-  
5.8424316952,-0.8926545144,0.0942157336\H,-4.3905731031,-0.8037540354,  
-0.9235705068\C,-4.3574434158,-2.4075018168,0.509474973\C,-5.183752757  
5,-3.2067551396,1.323941567\C,-3.1287277031,-2.9413895408,0.0799062966  
\C,-4.7736907492,-4.4931836069,1.7048113711\H,-6.15697512,-2.826284215  
7,1.6506179504\C,-2.6806811157,-4.2125080013,0.4833731373\H,-2.4946830  
305,-2.3448768325,-0.5795306833\C,-3.527272658,-4.9912518322,1.2970534

188\H,-5.4309192175,-5.1124892778,2.3228480257\H,-3.2149246963,-5.9949  
864909,1.6025988975\C,1.2062186083,-4.7039483936,0.3036569305\H,2.0773  
828336,-4.4176317631,0.9159355281\H,1.2070032659,-5.8031314269,0.20978  
55715\H,1.3281490387,-4.266054778,-0.6985959494\C,-0.2402963517,-4.846  
7303507,2.3719356288\H,-0.2396458658,-5.9474922787,2.2935566949\H,0.60  
04356349,-4.5461782726,3.0146542616\H,-1.1699419513,-4.5344790022,2.86  
90347263\C,-4.5580742989,1.5067740218,0.3793836585\H,-5.65414653,1.588  
7659875,0.2850306535\H,-4.209291025,2.347072177,1.0018786764\H,-4.1114  
291973,1.6064436827,-0.6213591945\C,-4.8022479286,0.0593866559,2.43423  
3332\H,-4.4213282882,0.8626735666,3.0828762338\H,-5.8984270398,0.16398  
73798,2.3642009903\H,-4.5778487206,-0.9031375521,2.9157545443\H,-1.103  
4445238,-4.3367010246,-0.9735337869\C,-3.8900747628,-1.0056610475,6.87  
37707983\C,-3.0741317329,-1.9374581475,5.9544670803\H,-4.376704165,-0.  
1313328196,6.424803383\H,-4.4679724943,-1.4635369341,7.6862115195\H,-3  
.0152880958,-1.6920342366,4.8882873523\H,-3.1009696549,-3.0146214746,6  
.1598866687\C,-2.4180406815,-1.0506523524,6.9265289327\H,4.4607893943,  
0.9140278291,-0.7362584709\C,0.1549860973,4.7396726851,-0.1409149019\H  
,0.1364878341,5.8412062611,-0.0793042024\H,1.0823235813,4.434878034,-0  
.6469077793\H,-0.6915157502,4.4155586974,-0.765011094\C,4.3343281911,2  
.4079566211,1.6785319834\C,3.1044231421,2.922957916,2.1265573504\C,5.1  
333686506,3.2163931825,0.8463331111\C,2.6284715055,4.1841721345,1.7237  
147634\H,2.4913274023,2.3182645614,2.798548938\C,4.6955579889,4.493433  
3111,0.4656739543\H,6.1057374509,2.8489463776,0.5029235771\C,3.4479852  
96,4.9724137508,0.891930363\H,5.3305506375,5.1193027608,-0.1686119526\  
H,3.1122251923,5.9679448841,0.584459493\N,-0.7324062879,0.8839941191,5  
.066031347\N,-1.3110376951,1.860983918,5.2620986165\\Version=ES64L-G09  
RevD.01\State=1-A\HF=-2848.1947989\RMSD=2.945e-09\RMSF=8.183e-06\Dipol  
e=-0.0673444,-0.4749968,1.0679507\Quadrupole=7.5785305,2.0616039,-9.64  
01344,-4.7267137,-3.6955842,-3.6364805\PG=C01 [X(C48H53N3O8Rh2)]\@

## TS1

1\1\GINC-SHI\_02\FTS\RBPW91\GenECP\C48H53N3O8Rh2\YIN\12-Apr-2016\0\#\p  
opt=(calcfc,ts,noeigen) genecp bpw91\rh2esp2\_mcp\_ts1\_2\0,1\Rh,1.9676  
21525,1.8268126678,0.0914738017\Rh,0.2410631909,0.1279857375,0.0892740  
35\O,0.9315286811,2.8116896507,1.5488495428\C,-0.1738058302,2.32548632  
82,1.9723590461\O,-0.6984259031,1.2212330087,1.5560985772\O,2.93024239  
33,0.7591605274,1.5728248995\C,2.4069489643,-0.3340765834,1.9901313356  
\O,1.3026124986,-0.8434746002,1.5662506678\O,2.9627071513,0.812448445,  
-1.3888628371\C,2.4462139772,-0.281495564,-1.8198753092\O,1.3505246088  
, -0.8052567357,-1.4018042181\O,0.9526423035,2.8504693505,-1.3504649174  
\C,-0.1488239099,2.3673579464,-1.7942208583\O,-0.6944829553,1.26556139  
62,-1.4099309034\C,-1.1432303784,-2.643915915,-0.2812864619\C,-2.26545  
19018,-3.4660100038,-0.6512735739\C,0.1281995552,-3.2566389307,-0.1261  
160701\C,-3.6477971032,-2.9254671528,-0.8428652432\C,-2.0569827522,-4.

8450853974,-0.8317322332\C,0.3124617367,-4.6199198077,-0.3686067409\H,  
0.9660315866,-2.63952522,0.1905713161\C,-0.7844106426,-5.4224911906,-0  
.7158407444\H,-2.9154709684,-5.4707168482,-1.0916370329\H,1.3089268521  
, -5.056060498,-0.2583663298\H,-0.6554173719,-6.4944830964,-0.890678751  
4\N,-1.2767596884,-1.2549131317,-0.1281189076\C,-4.7604102135,-3.50467  
41444,-0.038011913\C,-4.5107015691,-4.0664127887,1.2358721614\C,-6.094  
2573727,-3.4975835184,-0.5080752737\C,-5.5537241336,-4.5860520305,2.01  
33390302\H,-3.4883510764,-4.0849858638,1.6223743016\C,-7.1352397624,-4  
.0194121795,0.2682746774\H,-6.3088327375,-3.0902424981,-1.4980672655\C  
, -6.8720833346,-4.5654862213,1.534678941\H,-5.3338528269,-5.0056413367  
, 2.9995039658\H,-8.1575428217,-4.0068957698,-0.1214485447\H,-7.6862927  
553,-4.9738804289,2.1400681554\C,-0.9285323483,3.0866402664,3.08221854  
9\C,-0.8757513732,3.1637089021,-2.9032875114\C,-0.166574794,4.36922509  
66,3.4674812111\H,-0.7062248028,4.8824897859,4.2814865143\H,0.84984416  
22,4.1381766512,3.8207307081\C,-2.343696176,3.4825131707,-2.4439541714  
\H,-2.8185186619,4.0440930403,-3.2681649137\H,-2.8853903389,2.52707903  
26,-2.3494499985\C,-0.9422821265,2.2727828445,-4.1692921112\H,-1.46299  
21266,1.3250999854,-3.9684214296\H,-1.4808467587,2.8049443665,-4.97144  
46181\H,0.0698765892,2.0409487308,-4.5401446212\C,-1.0368795703,2.1504  
980731,4.3131613786\H,-1.595515449,2.6583207283,5.117160154\H,-1.55878  
21202,1.2157125651,4.0599524426\H,-0.0377990061,1.8978710761,4.7053631  
789\C,-2.3843311228,3.4275185629,2.5975719349\H,-2.9304491326,2.479096  
3448,2.4705767149\H,-2.8689504466,3.9742283623,3.4259814965\C,3.160965  
1901,-1.0927163723,3.1046270054\C,3.2094365205,-1.0181481875,-2.943751  
1627\C,4.6169958334,-1.4173272561,2.607398011\H,5.1115737973,-1.975046  
6506,3.4225080627\C,4.6578979574,-1.3615150059,-2.4368003802\H,5.15935  
14449,-1.9039620145,-3.2579470293\H,5.1994656757,-0.4113668741,-2.2973  
65232\C,4.7290882074,-2.1701211947,-1.155385145\C,4.7960877163,-3.5776  
124438,-1.1555672709\C,4.7162701985,-1.5041072609,0.0843934566\C,4.829  
3270505,-4.286490689,0.054812899\H,4.8377893546,-4.1196503268,-2.10566  
9476\C,4.7084493823,-2.1971815097,1.3093873439\H,4.7025171605,-0.41152  
82887,0.0960161124\C,4.7756011593,-3.6044034225,1.2797426698\H,4.90443  
56461,-5.3781671596,0.0435614443\H,4.8024411048,-4.1672324279,2.218221  
6043\C,3.2705239722,-0.1496188844,4.3297792147\H,2.2733243108,0.084039  
8278,4.7378216974\H,3.8544484157,-0.6398612236,5.1268785012\H,3.766261  
0112,0.7956022637,4.0619888811\C,2.4180234962,-2.3807809783,3.50433075  
5\H,2.9626607431,-2.8790062725,4.3244507147\H,1.3980649775,-2.15981719  
71,3.8535512257\H,2.3407037579,-3.0841081053,2.6630538948\C,3.33766757  
44,-0.049541345,-4.1466981604\H,3.9253581467,-0.5270281028,-4.94881751  
53\H,2.3457015198,0.1990464686,-4.5588036841\H,3.8365565722,0.88667389  
29,-3.8545578511\C,2.4650566737,-2.293025082,-3.3802991677\H,1.4523128  
021,-2.05767015,-3.7409206988\H,3.0194404071,-2.7780737361,-4.20193667  
73\H,2.3665315386,-3.0114339784,-2.5546000403\H,5.1548596352,-0.461593  
9504,2.4955200211\C,-4.7623387972,-1.0520249661,-2.4783843501\C,-3.253

4246243,-1.1018778374,-2.7969899901\H,-5.153208391,-0.1918021107,-1.92  
09405595\H,-5.4567535561,-1.4361243437,-3.2358298519\H,-2.6104356337,-  
0.2864457928,-2.4487765469\H,-2.9511268432,-1.5353391764,-3.7588140121  
\C,-3.8517149708,-1.9817290917,-1.7869627325\H,-0.0794882052,5.0606100  
02,2.6170625911\C,-0.1130664691,4.4625099579,-3.2282207516\H,-0.636691  
1681,5.0004941283,-4.0370526823\H,-0.0483295124,5.1253569894,-2.353700  
6527\H,0.9120537568,4.2473643794,-3.5655635299\C,-2.4742721605,4.23434  
52839,1.3165167357\C,-2.4559860394,3.5672286096,0.0779171428\C,-2.5618  
161083,5.6404597566,1.3160473425\C,-2.4598778941,4.2596785799,-1.14657  
38122\H,-2.429581441,2.4753687792,0.0678926586\C,-2.6094117545,6.34786  
54237,0.1056790016\H,-2.6051362761,6.1827744245,2.2660221866\C,-2.5489  
123251,5.6654484178,-1.1183045881\H,-2.6939302891,7.4387164621,0.11631  
52646\H,-2.5809827164,6.2270675175,-2.0574356946\N,-2.499306174,-0.969  
8294933,0.9356313621\N,-3.1338037735,-0.0729444504,1.2537632127\\Versi  
on=EM64L-G09RevA.01\State=1-A\HF=-2848.1625923\RMSD=4.424e-09\RMSF=4.6  
29e-06\Dipole=-0.1015538,-0.8473512,-0.2290453\Quadrupole=-7.7480253,-  
0.3852407,8.133266,-6.1952032,3.3024274,-0.282549\PG=C01 [X(C48H53N3O8  
Rh2)]\@

## N<sub>2</sub>

1\1\GINC-SHI\_02\SP\RBPW91\6-311++G(d,p)\N2\YIN\15-Mar-2016\0\#\#p bpw91  
/6-311++g(d,p) geom=check scrf=(iefpcm,smd,solvent=toluene)\Title Car  
d Required\0,1\N,0,0.,0.,0.1418146895\N,0,0.,0.,1.2581853105\\Version  
=EM64L-G09RevA.01\State=1-SGG\HF=-109.5462206\RMSD=9.062e-09\Dipole=0.  
,0.,0.\Quadrupole=0.4333358,0.4333358,-0.8666716,0.,0.,0.\PG=D\*H [C\*(N  
1.N1)]\@

## <sup>1</sup>IN2

1\1\GINC-A749\SP\RBPW91\GenECP\C48H53N1O8Rh2\SI0C001\02-Jun-2016\0\#\#p  
genecp bpw91 scrf=(iefpcm,smd,solvent=toluene) geom=check scf=(maxcyc  
le=256)\Title Card Required\0,1\Rh,0,0.0087476436,0.0003607012,0.015  
761876\Rh,0,0.0137922591,-0.0507360452,2.4589108896\O,0,2.0559597335,0  
.0045758411,0.0391121835\C,0,2.6620881386,-0.0293009579,1.1677817539\O  
,0,2.1006531554,-0.0662583842,2.3250332933\O,0,0.0365883504,-2.0555620  
303,0.0114853792\C,0,0.0379320673,-2.6709219364,1.1357104783\O,0,0.019  
5354865,-2.1090525654,2.2938189588\O,0,-2.0557497511,0.0284458018,0.09  
56188731\C,0,-2.6400774603,-0.002061279,1.2354515873\O,0,-2.0528019367  
, -0.0475928532,2.380582488\O,0,0.0180216722,2.036768925,0.0761338206\C  
,0,0.0092755491,2.6287599162,1.2107792435\O,0,-0.0164101059,2.04049171  
32,2.3581730591\C,0,-0.514245758,-0.7041522901,5.3007702369\C,0,-0.215  
9582276,-0.4699281054,6.7148946522\C,0,-1.4822321235,-1.7263147458,4.9  
78786484\C,0,0.6388649556,0.6619535186,7.1386495759\C,0,-0.7866786295,  
-1.3182115687,7.6796276051\C,0,-2.0392647423,-2.5265681576,5.966209643  
1\H,0,-1.7310638894,-1.8817608548,3.9308704572\C,0,-1.6862465119,-2.33



0170813,7.3192985314\H,0,-0.5418814675,-1.1594802824,8.7333970513\H,0,  
-2.7524058012,-3.3105723234,5.6956859013\H,0,-2.1305933234,-2.95884988  
5,8.0965914347\N,0,0.223199148,-0.0401008054,4.3909393533\C,0,1.711609  
9305,0.4211756519,8.1433396561\C,0,2.4382917113,-0.7921810013,8.135731  
3986\C,0,2.0523054247,1.3963714205,9.1083001872\C,0,3.4749672087,-1.01  
51317111,9.0511648271\H,0,2.1962887409,-1.554977211,7.3909114164\C,0,3  
.0873279351,1.1716252511,10.023640295\H,0,1.4880371207,2.3308107167,9.  
1439458703\C,0,3.8048420314,-0.0348042678,9.9993987986\H,0,4.031034978  
6,-1.9567131329,9.0190718589\H,0,3.3297907104,1.9388237547,10.76502931  
1\H,0,4.6129160309,-0.2097632513,10.7154279405\C,0,4.2084127028,-0.052  
7767543,1.156459013\C,0,0.0032662995,4.1741771204,1.2154300212\C,0,4.7  
445634638,0.0431044781,-0.2842496118\H,0,5.8473137863,0.0048973975,-0.  
2680576154\H,0,4.3798023084,-0.7930878972,-0.8997117159\C,0,1.19749637  
58,4.7044791591,2.0866811692\H,0,1.1337554507,5.8072075554,2.070903860  
9\H,0,1.0252260246,4.3869769592,3.1282053023\C,0,-1.3210914633,4.64588  
19245,1.8683073999\H,0,-1.4188069439,4.2689421685,2.8974142755\H,0,-1.  
3490718348,5.7482286162,1.8966359227\H,0,-2.1923109032,4.3013973263,1.  
2872362383\C,0,4.6639343926,-1.387900255,1.7988473255\H,0,5.7658761885  
, -1.4315730996,1.8284060692\H,0,4.2804353347,-1.4863511968,2.825620094  
4\H,0,4.3085460719,-2.2496701292,1.2099017683\C,0,4.7571865415,1.12520  
71384,2.0390160499\H,0,4.4440231145,0.9408102532,3.0798189006\H,0,5.85  
92520507,1.0542034847,2.0120932673\C,0,0.0801265419,-4.2150737518,1.09  
84715071\C,0,-4.1861284824,0.0362767995,1.2361294804\C,0,-1.1655008499  
, -4.7439220657,0.2994073139\H,0,-1.1044044747,-5.846694343,0.313687159  
5\C,0,-4.731953883,-1.1813463564,0.4055109816\H,0,-5.8343437882,-1.123  
548958,0.44569863\H,0,-4.437604307,-1.0299209402,-0.6461208899\C,0,-4.  
2625257194,-2.5487524845,0.8639761571\C,0,-4.9980039845,-3.333001677,1  
.774845884\C,0,-3.0435575268,-3.0578062153,0.378981285\C,0,-4.50838036  
79,-4.579244569,2.1940785936\H,0,-5.9630500458,-2.9735365157,2.1460950  
613\C,0,-2.517591483,-4.2883866394,0.8136141309\H,0,-2.4826400113,-2.4  
725124552,-0.3535263654\C,0,-3.2729121065,-5.0516372131,1.7259243091\H  
,0,-5.0967122712,-5.1894252138,2.8862754052\H,0,-2.9007415468,-6.02598  
37872,2.0584475657\C,0,1.3582409353,-4.6361102437,0.329698959\H,0,2.26  
53575632,-4.3107041025,0.8648147933\H,0,1.3940064955,-5.7351497194,0.2  
417144739\H,0,1.3768075054,-4.2016632578,-0.6808482888\C,0,0.112510757  
7,-4.807031523,2.5199658665\H,0,0.173591279,-5.9069259697,2.4569509975  
\H,0,0.9880345309,-4.4451745466,3.0800275556\H,0,-0.7854139931,-4.5418  
243415,3.0960774447\C,0,-4.6270426638,1.340241829,0.5243913548\H,0,-5.  
7279661202,1.3806712964,0.4670497441\H,0,-4.2858410555,2.2284625219,1.  
0813311648\H,0,-4.2196880657,1.39375726,-0.4963176251\C,0,-4.744637730  
7,0.0129303987,2.6711565461\H,0,-4.3656002347,0.8626510815,3.258794868  
8\H,0,-5.8454796524,0.0802503617,2.6370092369\H,0,-4.4704631272,-0.910  
3813694,3.2012853716\H,0,-1.0507658265,-4.4271571554,-0.7505362386\C,0  
,0.7738132893,3.3185298585,6.5843343444\C,0,-0.4251113848,2.76265722,5

.7854906152\H,0,1.6846759292,3.594096896,6.0391116996\H,0,0.5583272741  
,3.9715270645,7.4388019346\H,0,-0.3324758995,2.6644458021,4.6998737356  
\H,0,-1.430304693,3.0299395501,6.1361807154\C,0,0.4016905511,1.8957737  
785,6.6357361815\H,0,4.435884817,0.9790601701,-0.7717122255\C,0,0.0916  
626832,4.717162346,-0.2237324875\H,0,0.069743804,5.8201345822,-0.20069  
74943\H,0,1.0176973535,4.3975959758,-0.7224219454\H,0,-0.756789675,4.3  
68741128,-0.8318124097\C,0,4.3144998185,2.5130048018,1.6164943639\C,0,  
3.0772280043,3.0125920607,2.0641387877\C,0,5.0933017685,3.3214119701,0  
.7651520978\C,0,2.576643531,4.2574984382,1.6404443843\H,0,2.4834176708  
,2.4060997068,2.7521097204\C,0,4.6295504054,4.5826858218,0.3633498358\  
H,0,6.0706069966,2.9658058052,0.4232720769\C,0,3.3755148616,5.04515997  
87,0.7882898218\H,0,5.2487182788,5.208506203,-0.2864929254\H,0,3.01804  
25576,6.027679453,0.4636529559\\Version=ES64L-G09RevD.01\State=1-A\HF=  
-2739.4217851\RMSD=3.149e-09\Dipole=-0.7164378,-0.3218823,1.28741\Quad  
rupole=0.9620754,8.2670057,-9.229081,-4.8442328,-3.4654524,-2.5117361\  
PG=C01 [X(C48H53N1O8Rh2)]\@

### <sup>3</sup>IN2

1\1\GINC-SHI\_02\SP\UBPW91\GenECP\C48H53N1O8Rh2(3)\YIN\01-Jun-2016\0\#\#  
p genecp bpw91 geom=check scrf=(iefpcm,smd,solvent=toluene)\Title Car  
d Required\0,3\Rh,0,-1.3678286257,-2.0802150438,0.4809956225\Rh,0,-0.  
2212415644,-0.0746632761,-0.2427670307\O,0,0.106868664,-2.3881126648,1  
.8628553343\C,0,1.0724238561,-1.5487822187,1.93670833\O,0,1.2006365549  
, -0.492350657,1.2105565732\O,0,-2.3920016168,-0.9698791007,1.874524620  
4\C,0,-2.1529477475,0.2899008963,1.9354859494\O,0,-1.3251266565,0.9322  
577665,1.1907394339\O,0,-2.8096576082,-1.7378754382,-0.9460113549\C,0,  
-2.7002224632,-0.6936403283,-1.6840101728\O,0,-1.749620707,0.170302464  
8,-1.6227626842\O,0,-0.3010858004,-3.1386365459,-0.9064456253\C,0,0.52  
94988788,-2.5245182322,-1.6635239519\O,0,0.7741365037,-1.2585481629,-1  
.6311586103\C,0,0.4398511634,2.913371122,-0.8352660063\C,0,1.570568874  
2,3.830951692,-0.8372483303\C,0,-0.8935753536,3.4629241359,-0.87086230  
45\C,0,2.9731651503,3.3333695941,-0.8963193536\C,0,1.3086884891,5.2099  
275859,-0.799258252\C,0,-1.0964961564,4.8365343803,-0.8609524591\H,0,-  
1.7294999603,2.763834268,-0.8894085518\C,0,0.0018702702,5.7206962477,-  
0.8159425375\H,0,2.1582100529,5.8984548398,-0.775825012\H,0,-2.1171642  
025,5.2302274866,-0.880443303\H,0,-0.1600260994,6.8018694036,-0.805615  
4938\N,0,0.6392302575,1.5956501531,-0.7770199904\C,0,3.970209574,3.883  
8671362,0.0660232486\C,0,3.5803534162,4.2536128518,1.3746433108\C,0,5.  
3314560402,4.0308332321,-0.2865944747\C,0,4.5180493766,4.7358320977,2.  
2972171105\H,0,2.5328963865,4.1490787072,1.6695490935\C,0,6.2673140969,  
4.515020676,0.6350306406\H,0,5.6488803341,3.7743372202,-1.2994110874\C  
,0,5.8666400589,4.8686974234,1.9332328713\H,0,4.1928493874,5.006283298  
7,3.3063343655\H,0,7.3137648851,4.6257485385,0.3350955299\H,0,6.597920  
9387,5.2491753211,2.6521902547\C,0,2.1740705688,-1.796390306,2.9904709

203\C,0,1.2952611781,-3.3480406314,-2.7219338943\C,0,1.9172432394,-3.1  
140968831,3.7457711142\H,0,2.7003418492,-3.254724414,4.5101397306\H,0,  
0.9405510937,-3.0976535574,4.2525201233\C,0,2.8397444772,-3.1302542849  
, -2.5337320464\H,0,3.3412362411,-3.7311288731,-3.3130855286\H,0,3.0605  
016897,-2.0721285025,-2.7500907648\C,0,0.8966155657,-2.8119348704,-4.1  
210042777\H,0,1.1248070752,-1.7399411436,-4.2193465921\H,0,1.449625311  
7,-3.3614818134,-4.9012538073\H,0,-0.1804508169,-2.9562140805,-4.30699  
46218\C,0,2.1534836118,-0.6071042565,3.9846724483\H,0,2.9472985652,-0.  
7397126747,4.7388773986\H,0,2.3186787518,0.3491925733,3.4660350368\H,0  
,1.189060635,-0.5542378112,4.5163381466\C,0,3.5780567911,-1.8173871023  
,2.2846581301\H,0,3.7628000209,-0.8118979801,1.8721467998\H,0,4.327045  
9451,-1.9852718995,3.0788932149\C,0,-2.918902614,1.0952895076,3.008635  
3973\C,0,-3.8001577623,-0.4657144796,-2.7457823123\C,0,-4.4630460382,0  
.9037185966,2.7852126292\H,0,-4.9711165553,1.5035726355,3.5610883981\C  
,0,-5.1990222804,-0.4052447094,-2.0304042616\H,0,-5.950130735,-0.23307  
63047,-2.821803529\H,0,-5.4011141448,-1.4010510361,-1.6025504277\C,0,-  
5.3345837167,0.6439466768,-0.9432918196\C,0,-5.8268874278,1.9381627549  
, -1.2044795335\C,0,-4.9440763454,0.3327442753,0.3724124987\C,0,-5.9033  
738104,2.889260299,-0.175996805\H,0,-6.1642733585,2.1978586296,-2.2129  
389226\C,0,-4.9750692566,1.2839299181,1.4092236085\H,0,-4.5954124837,-  
0.6785696323,0.5947992153\C,0,-5.4711667022,2.5704554114,1.1199782878\  
H,0,-6.3051935515,3.8852560882,-0.3854551749\H,0,-5.5328764442,3.32033  
98418,1.9150170026\C,0,-2.5544212702,0.5017382472,4.3935110224\H,0,-1.  
4805104638,0.6295739973,4.6070354897\H,0,-3.1197087026,1.0250354295,5.  
1830128342\H,0,-2.7926845741,-0.5713001292,4.4424251561\C,0,-2.5352830  
443,2.5857915104,2.9657138109\H,0,-3.0770955956,3.1260184253,3.7607170  
172\H,0,-1.4558723896,2.7210222804,3.1314123105\H,0,-2.7841985309,3.04  
64817519,1.9993169956\C,0,-3.7994660432,-1.6882523261,-3.6983110834\H,  
0,-4.6047231501,-1.5785698735,-4.4441077252\H,0,-2.8439702498,-1.76333  
62285,-4.243083312\H,0,-3.9585374927,-2.6257752673,-3.1447350944\C,0,-  
3.5388002601,0.8204130662,-3.5515173864\H,0,-2.5596858406,0.7837976966  
, -4.052379181\H,0,-4.3180049992,0.9319931516,-4.3246116608\H,0,-3.5555  
346473,1.7142648304,-2.9117284029\H,0,-4.7027668284,-0.1538490996,2.98  
41389018\C,0,4.3619978641,1.5630742025,-2.4251880359\C,0,2.9208604404,  
1.5924030741,-2.9755195119\H,0,4.6883402361,0.6766300616,-1.867517235\  
H,0,5.1536093144,2.0094335269,-3.0397688513\H,0,2.2737130957,0.7298448  
277,-2.7857899522\H,0,2.7540631765,2.0769308814,-3.9461049927\C,0,3.32  
36407943,2.4250355748,-1.8333817691\H,0,1.9316253304,-3.9808830766,3.0  
69412143\C,0,0.9325492266,-4.8410926331,-2.6147033876\H,0,1.4686590212  
, -5.4046472995,-3.3972295909\H,0,1.2082139468,-5.257285646,-1.63512563  
31\H,0,-0.1474554579,-4.9974252703,-2.7567933042\C,0,3.7427834892,-2.8  
517367754,1.1871897742\C,0,3.3263727683,-2.5479264883,-0.1222791355\C,  
0,4.2882890919,-4.1269323545,1.4346589988\C,0,3.3839302816,-3.49166631  
33,-1.1648066657\H,0,2.9344105438,-1.5500776616,-0.3327593114\C,0,4.39

18021142,-5.0683638166,0.3999861238\H,0,4.6439232984,-4.3799433025,2.4  
385758999\C,0,3.9335962484,-4.7590421465,-0.8891178424\H,0,4.831728949  
8,-6.0500438533,0.5997665137\H,0,4.0135650939,-5.5021108064,-1.6890114  
054\\Version=EM64L-G09RevA.01\State=3-A\HF=-2739.4241391\S2=2.026348\S  
2-1=0.\S2A=2.000375\RMSD=4.221e-09\Dipole=-0.1293916,0.2352597,-0.1209  
835\Quadrupole=-3.4032999,-5.8752559,9.2785558,-7.7397098,3.638862,7.8  
723561\PG=C01 [X(C48H53N1O8Rh2)]\@

### TS1'

1\1\GINC-SHI\_02\SP\RBPW91\6-311++G(d,p)\C16H13N3\YIN\24-Aug-2016\0\#\p  
bpw91/6-311++g(d,p) scrf=(iefpcm,smd,solvent=toluene)\Title Card Req  
uired\0,1\C,C,1,1.47392439\C,1,1.4568545,2,117.34752735\C,2,1.4886648  
5,1,122.29637202,3,173.70187756,0\C,2,1.39697464,1,117.91892458,3,-3.3  
4028331,0\C,3,1.39180555,1,121.28809052,2,12.64667795,0\H,3,1.09145161  
,1,116.39017441,2,-174.02724268,0\C,6,1.40599054,3,119.26057544,1,-12.  
52686984,0\H,5,1.09411696,2,118.41108093,1,177.4524399,0\H,6,1.0941344  
1,3,120.16648484,1,173.12496692,0\H,8,1.09339642,6,120.25479735,3,-174  
.93303057,0\N,1,1.3176981,3,111.84198992,6,-160.22672519,0\C,4,1.48982  
508,2,119.33254208,1,-124.43255415,0\C,13,1.41389978,4,120.407574,2,31  
.00910093,0\C,13,1.41366455,4,121.5658793,2,-149.93292293,0\C,14,1.400  
31622,13,120.98677519,4,178.54626262,0\H,14,1.09312564,13,119.34478989  
,4,-0.65530977,0\C,15,1.39938765,13,120.94000451,4,-178.73708448,0\H,1  
5,1.09188181,13,119.2958653,4,2.19060678,0\C,16,1.40257897,14,120.2959  
9228,13,0.40525021,0\H,16,1.09391862,14,119.56069778,13,-179.38175234,  
0\H,18,1.09403599,15,119.56500442,13,-179.5170653,0\H,20,1.09364146,16  
,120.31924083,14,179.73589724,0\C,4,2.72845218,2,134.00959784,1,60.123  
97526,0\C,24,1.54053374,4,72.72513344,2,-2.88457731,0\H,24,1.09694393,  
4,113.19335018,2,-116.89551682,0\H,24,1.09668211,4,114.49801046,2,110.  
80179398,0\H,25,1.09472324,24,119.06772376,4,-107.39790313,0\H,25,1.09  
703694,24,117.98158224,4,107.75697494,0\C,4,1.35285259,2,118.13497283,  
1,59.09179896,0\N,12,1.96294179,1,112.21158294,3,-141.2703053,0\N,31,1  
.12682264,12,134.1633333,1,-171.60363981,0\\Version=EM64L-G09RevA.01\S  
tate=1-A\HF=-781.7268584\RMSD=5.837e-09\Dipole=0.7971817,-0.1955306,1.  
3924701\Quadrupole=5.1207985,0.5144855,-5.635284,1.7265632,-6.9022382,  
-0.1897115\PG=C01 [X(C16H13N3)]\@

### <sup>3</sup>IN2'

1\1\GINC-SHI\_02\SP\UBPW91\6-311++G(d,p)\C16H13N1(3)\YIN\24-Aug-2016\0\  
\#\p bpw91/6-311++g(d,p) geom=check scrf=(iefpcm,smd,solvent=toluene)\  
Title Card Required\0,3\C,0,0.0336415074,-0.1072083508,0.007163995\C,  
0,0.0106379241,-0.0205966261,1.4670503541\C,0,1.3125321796,-0.05381969  
91,-0.6702544873\C,0,-1.2563286195,-0.1456251094,2.2303398826\C,0,1.23  
18398828,0.1756469389,2.1328559351\C,0,2.4898914773,0.1102047552,0.041  
0860294\H,0,1.3089594883,-0.1311788446,-1.7597666288\C,0,2.4550717292,

0.2328524886,1.4481764646\H,0,1.2222988162,0.2622156413,3.2226587766\H  
,0,3.445287743,0.1529150933,-0.4896978539\H,0,3.3836443633,0.363881985  
1,2.0099507789\N,0,-1.0694505571,-0.1814273241,-0.7240548685\C,0,-1.46  
72696935,0.7421194945,3.4133725597\C,0,-1.0792937542,2.1006734542,3.37  
0022239\C,0,-2.0817906735,0.262335312,4.5908402354\C,0,-1.3098958963,2  
.9497996897,4.4596199358\H,0,-0.6063704338,2.4934902741,2.465962959\C,  
0,-2.3095172832,1.1109418769,5.6812680558\H,0,-2.3670998314,-0.7903763  
492,4.6506634974\C,0,-1.9263346065,2.4593739111,5.6205877189\H,0,-1.01  
04729453,4.0002721978,4.3990501283\H,0,-2.7809270436,0.7149152936,6.58  
56551548\H,0,-2.1031391086,3.1216377685,6.4728692717\C,0,-2.1861248774  
, -1.0649739129,1.8854826633\C,0,-3.510272661,-1.6560797474,2.146580477  
\C,0,-2.6101118492,-2.1608181971,1.0016913594\H,0,-3.6525628972,-2.311  
5354333,3.0142282646\H,0,-4.4022241575,-1.0726231716,1.8875070978\H,0,  
-2.889457246,-1.9209618147,-0.0291499606\H,0,-2.1335658555,-3.14237089  
93,1.1174168451\\Version=EM64L-G09RevA.01\State=3-A\HF=-672.2286479\S2  
=2.024894\S2-1=0.\S2A=2.000316\RMSD=2.296e-09\Dipole=0.7458005,-0.1479  
203,0.8916858\Quadrupole=3.8048566,-0.2664893,-3.5383673,2.9064238,-6.  
6461597,0.7106436\PG=C01 [X(C16H13N1)]\@

## Solvation Gibbs free energy profiles for catalyzed and uncatalyzed N<sub>2</sub> extrusion using substrates 3a and 3b

(a) The energetic profile for generation of nitrene intermediate catalyzed by Rh<sub>2</sub>(esp)<sub>2</sub>

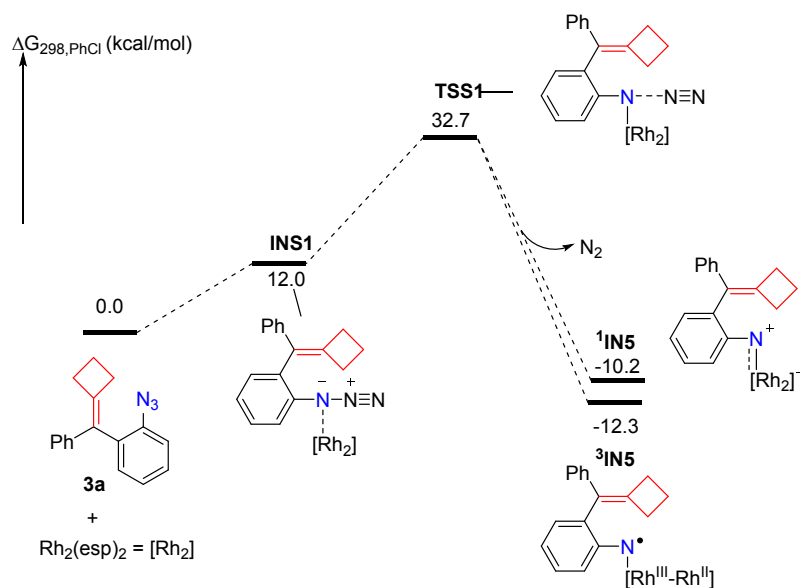

(b) The energetic profile for generation of nitrene intermediate uncatalyzed by Rh catalyst

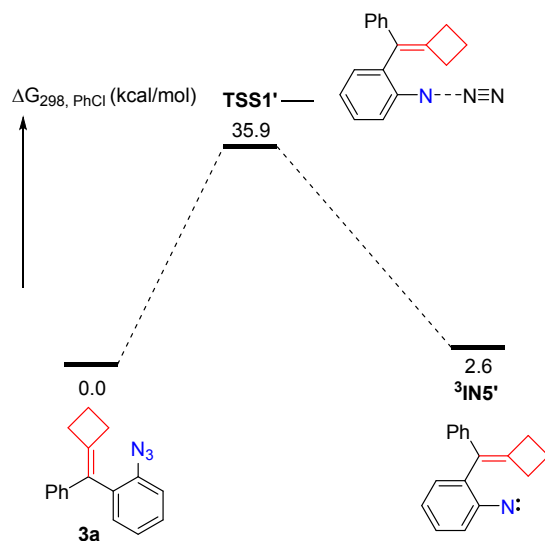

Scheme S1. Solvation Gibbs free energy profiles for catalyzed and uncatalyzed N<sub>2</sub> extrusion for substrate 3a.

(a) The energetic profile for generation of nitrene intermediate catalyzed by  $\text{Rh}_2(\text{esp})_2$

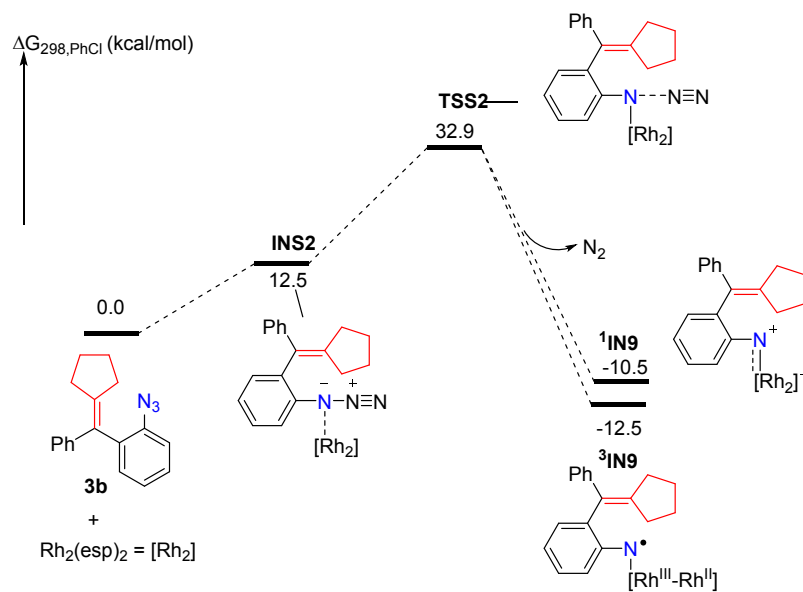

(b) The energetic profile for generation of nitrene intermediate uncatalyzed by Rh catalyst

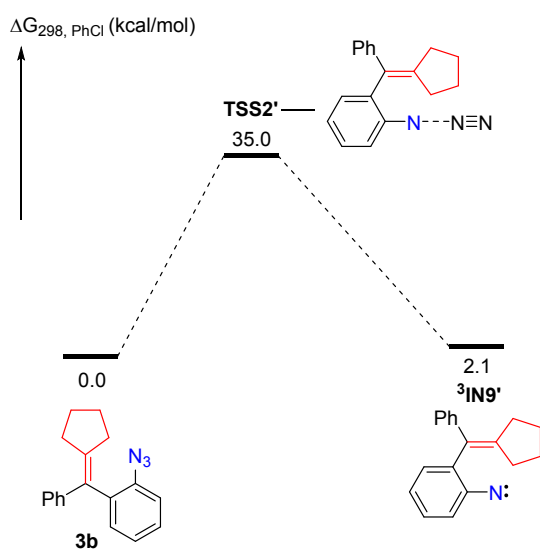

Scheme S2. Solvation Gibbs free energy profiles for catalyzed and uncatalyzed  $\text{N}_2$  extrusion for substrate **3b**.

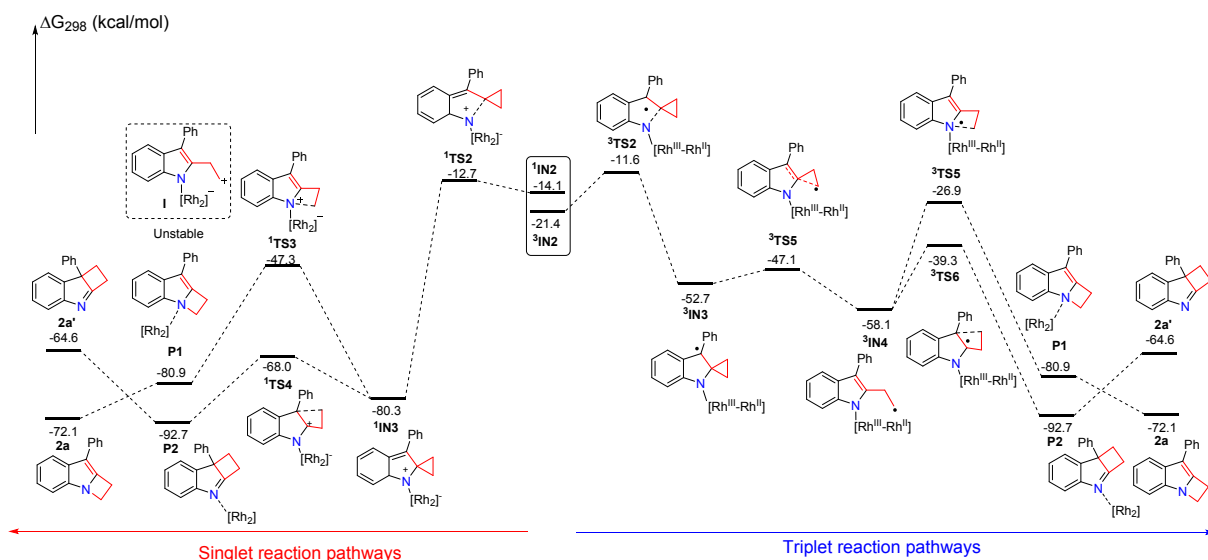

Scheme S3. The Gibbs free energy profile for the reaction of **1a** having three-member ring calculated at B3PW91-D3/BS1//BPW91-D3/BS1 level.

In order to investigate whether the dispersion corrections affect the energy profile significantly, we calculated the Gibbs free energy profile for the reaction of **1a** having three-member ring calculated at B3PW91-D3/BS1//BPW91/BS1 level. Although the energy values are different, the relative stabilities of key intermediates are not reversed and the energy barriers do not vary significantly.



The total energies, enthalpies and free energies of the lowest conformers of all species shown in Scheme 4 and archive entries

Table S2<sup>a</sup>

|                        | $E_{\text{tot}}$ (E <sub>h</sub> ) | H <sub>298, toluene</sub> | G <sub>298, toluene</sub> | # of imaginary frequencies       |
|------------------------|------------------------------------|---------------------------|---------------------------|----------------------------------|
| <b><sup>1</sup>TS2</b> | -2739.418163                       | -2738.465179              | -2738.611127              | 1<br>(-137.90 cm <sup>-1</sup> ) |
| <b><sup>1</sup>IN3</b> | -2739.504832                       | -2738.548297              | -2738.694895              | 0                                |
| <b><sup>1</sup>TS3</b> | -2739.456138                       | -2738.50174               | -2738.647929              | 1<br>(-422.75 cm <sup>-1</sup> ) |
| <b><sup>1</sup>TS4</b> | -2739.486433                       | -2738.531659              | -2738.678459              | 1<br>(-352.67 cm <sup>-1</sup> ) |
| <b><sup>3</sup>TS2</b> | -2739.40918                        | -2738.457029              | -2738.605513              | 1<br>(-137.94 cm <sup>-1</sup> ) |
| <b><sup>3</sup>IN3</b> | -2739.463016                       | -2738.508387              | -2738.655884              | 0                                |
| <b><sup>3</sup>TS5</b> | -2739.455919                       | -2738.502722              | -2738.648314              | 1<br>(-492.28 cm <sup>-1</sup> ) |
| <b><sup>3</sup>IN4</b> | -2739.470209                       | -2738.516936              | -2738.667435              | 0                                |
| <b><sup>3</sup>TS6</b> | -2739.432577                       | -2738.478967              | -2738.62936               | 1<br>(-334.91 cm <sup>-1</sup> ) |
| <b><sup>3</sup>TS7</b> | -2739.45103                        | -2738.497116              | -2738.648105              | 1<br>(-411.89 cm <sup>-1</sup> ) |
| <b>P1</b>              | -2739.510165                       | -2738.552256              | -2738.69835               | 0                                |
| <b>P2</b>              | -2739.50604                        | -2738.570063              | -2738.716178              | 0                                |
| <b>2a</b>              | -672.3477786                       | -672.0944309              | -672.1485019              | 0                                |
| <b>2a'</b>             | -672.3291797                       | -672.0769934              | -672.1304824              | 0                                |

a. SMD/BPW91/BS2// BPW91/BS1

## 'TS2

```
1\1\GINC-SHI_02\SP\RBPW91\GenECP\C48H53N1O8Rh2\YIN\02-Jun-2016\0\#\#p g
enecp bpw91 geom=check scrf=(iefpcm,smd,solvent=toluene)\Title Card R
equired\0,1\Rh,0,-1.2623107444,-2.1964166269,0.5104438986\Rh,0,-0.163
5312996,-0.1019005359,-0.0873188691\O,0,0.1865736069,-2.512728519,1.92
48317969\C,0,1.111580346,-1.6375707776,2.0721238986\O,0,1.2341889659,-
0.5457818689,1.401959806\O,0,-2.3807190581,-1.2033333432,1.9147328143\
C,0,-2.1919158894,0.0580821018,2.0472546535\O,0,-1.3635542834,0.764511
2632,1.3637449801\O,0,-2.6567743123,-1.7992189928,-0.9628976712\C,0,-2
.5514367603,-0.7225951292,-1.6497367729\O,0,-1.6363231077,0.1730867565
,-1.512610628\O,0,-0.1178131174,-3.1694561747,-0.8658422865\C,0,0.7258
637117,-2.5044463639,-1.5586449115\O,0,0.9131293381,-1.2298885366,-1.4
766087657\C,0,0.2566280031,2.8163312664,-0.629920605\C,0,1.1941318627,
3.9270772363,-0.8597242487\C,0,-1.1530272478,3.1385480432,-0.566308527
7\C,0,2.578778572,3.5614036045,-1.046280695\C,0,0.7126310539,5.2540745
482,-0.8721751686\C,0,-1.5786178312,4.4546033174,-0.5984925846\H,0,-1.
8638113683,2.3245988206,-0.4447162613\C,0,-0.6501510072,5.5182572796,-
0.7480119868\H,0,1.4196753053,6.0734601212,-1.0262546691\H,0,-2.647338
2137,4.6758061663,-0.5235755374\H,0,-1.0096945429,6.5499788248,-0.7990
187207\N,0,0.772494172,1.6172091247,-0.3434856166\C,0,3.6719287567,4.4
407975646,-0.5561009883\C,0,3.5558207183,5.1166911879,0.6819043412\C,0
,4.8537636031,4.6261103494,-1.3091307949\C,0,4.5883134522,5.9381553988
,1.1510909247\H,0,2.6548174273,4.9734524656,1.2840446238\C,0,5.8838382
16,5.4511183338,-0.841227192\H,0,4.9500394708,4.1368166111,-2.28116597
89\C,0,5.756447086,6.1095163205,0.3920169167\H,0,4.4830225933,6.441252
3108,2.1167469389\H,0,6.7862509065,5.5861603674,-1.4446653461\H,0,6.56
18936098,6.7525381537,0.757998497\C,0,2.1728916674,-1.8880386732,3.169
9052644\C,0,1.5755732491,-3.2724064916,-2.5956141832\C,0,1.9396619518,
-3.2463491123,3.8570161786\H,0,2.6894642438,-3.387541219,4.6543584539\
H,0,0.9391588405,-3.2931566807,4.3127235878\C,0,3.1001118229,-2.989027
2107,-2.3475194701\H,0,3.653930269,-3.5406015064,-3.1280771413\H,0,3.2
78058132,-1.9155648526,-2.5239935696\C,0,1.2062337569,-2.7410858809,-4
.0043012082\H,0,1.3946097337,-1.660155168,-4.0903374452\H,0,1.80923202
84,-3.2613337766,-4.7674864576\H,0,0.1433112044,-2.927585318,-4.229855
9463\C,0,2.0526968869,-0.7446845321,4.2096930494\H,0,2.8179313494,-0.8
705308401,4.9943648864\H,0,2.1920455192,0.238954041,3.7364203044\H,0,1
.0642521793,-0.7590623072,4.6980339487\C,0,3.608380904,-1.820075327,2.
5363812838\H,0,3.7656556503,-0.791915874,2.1708292264\H,0,4.3270087665
,-1.9871814401,3.3584556251\C,0,-3.0240697451,0.7868777022,3.126343010
5\C,0,-3.6119439309,-0.4883511567,-2.7509308257\C,0,-4.5514583359,0.59
39581775,2.8084221562\H,0,-5.1081353413,1.1462327001,3.5863942874\C,0,
-5.0399829238,-0.4787460272,-2.0937642011\H,0,-5.7619327668,-0.2833646
166,-2.9067410057\H,0,-5.242508096,-1.4951000707,-1.7175952825\C,0,-5.
2365500721,0.5174522085,-0.9672405391\C,0,-5.735753003,1.81681433,-1.1
863361081\C,0,-4.8997717433,0.1461793532,0.3477740213\C,0,-5.871570139
```

1,2.7142160579,-0.1162605627\H,0,-6.0325650284,2.1222921729,-2.1947495  
632\C,0,-4.9960630843,1.0413866396,1.4291545821\H,0,-4.5408400043,-0.8  
691446905,0.532502016\C,0,-5.4966892042,2.3350446327,1.1816046648\H,0,  
-6.2796682817,3.7139494978,-0.2940623848\H,0,-5.6081244004,3.042104460  
9,2.0098062917\C,0,-2.7287346357,0.1148387597,4.4910863759\H,0,-1.6708  
830999,0.2432934373,4.7729691107\H,0,-3.3467878395,0.5813479727,5.2768  
2918\H,0,-2.9515324693,-0.9621539465,4.461463368\C,0,-2.6610408441,2.2  
81731343,3.1950329573\H,0,-3.2557584557,2.7672246646,3.9876344831\H,0,  
-1.5950118205,2.419421926,3.4316619567\H,0,-2.8598699354,2.7971420572,  
2.2448418026\C,0,-3.5458738004,-1.6829043535,-3.735830006\H,0,-4.32775  
47084,-1.575247803,-4.5065496071\H,0,-2.5703619004,-1.7184524303,-4.24  
84103234\H,0,-3.6973936335,-2.6386963396,-3.212240822\C,0,-3.349183271  
7,0.8255549713,-3.50970507\H,0,-2.3476736856,0.8267144417,-3.965872925  
6\H,0,-4.0951578756,0.9393595266,-4.314886294\H,0,-3.4163175765,1.7009  
669139,-2.8480345026\H,0,-4.7892902284,-0.4749794702,2.9370532434\C,0,  
3.8978127469,1.4010856115,-2.0057969049\C,0,2.5131368178,1.3791599401,  
-2.6774687756\H,0,4.143646915,0.5529934439,-1.3569340478\H,0,4.7606750  
068,1.7993348634,-2.5517028003\H,0,1.8825565245,0.50501241,-2.50749856  
94\H,0,2.413174792,1.8344737712,-3.6708823244\C,0,2.8235036785,2.30458  
68838,-1.5605393011\H,0,2.0251739479,-4.0815997686,3.1469540104\C,0,1.  
2810842137,-4.7829494541,-2.5185132722\H,0,1.8791195199,-5.3120714103,  
-3.280048878\H,0,1.53294265,-5.1943620368,-1.5305756587\H,0,0.21765407  
86,-4.9903165792,-2.7101757242\C,0,3.8696474499,-2.8014471121,1.409749  
0021\C,0,3.4719173106,-2.4749591171,0.0999857023\C,0,4.4862985895,-4.0  
490979644,1.6274306614\C,0,3.6207027435,-3.3708693865,-0.9745711571\H,  
0,3.0166108934,-1.4989107322,-0.0815864455\C,0,4.6781688729,-4.9420380  
876,0.5626275423\H,0,4.826776173,-4.3183785828,2.6324108484\C,0,4.2410  
530141,-4.6115110884,-0.7285746113\H,0,5.1715057758,-5.9023571451,0.74  
05638209\H,0,4.3904830171,-5.3165460013,-1.5525492523\\Version=EM64L-G  
09RevA.01\State=1-A\HF=-2739.4181633\RMSD=2.717e-09\Dipole=0.3987946,1  
.3066131,-0.6165538\Quadrupole=-3.8786633,-2.1628539,6.0415172,-3.1838  
411,-1.0733353,5.9594417\PG=C01 [X(C48H53N1O8Rh2)]\@

### IN3

1\1\GINC-A717\SP\RBPW91\GenECP\C48H53N1O8Rh2\SIOC001\30-May-2016\0\#p  
genecp bpw91 scrf=(iefpcm,smd,solvent=toluene) geom=check\\Title Card  
Required\\0,1\rh,0,-0.0166769573,0.0012693511,-0.0659736176\rh,0,-0.0  
835364495,-0.1249445981,2.3573768035\O,0,2.0269554163,0.000857369,0.01  
3140509\C,0,2.6065459935,-0.0660695023,1.1517736615\O,0,2.0094786787,-  
0.1396569273,2.2924813986\O,0,0.0100431167,-2.0494937871,-0.1421919993  
\C,0,-0.0302779797,-2.7140025576,0.9539581583\O,0,-0.0753530768,-2.206  
2504515,2.1347870904\O,0,-2.0747807943,0.0119092202,-0.0717550214\C,0,  
-2.69709045,-0.0719214702,1.047721547\O,0,-2.1463041493,-0.1350180999,  
2.2075845651\O,0,-0.0152326608,2.0430837281,0.0682224375\C,0,-0.029620  
8072,2.5864517985,1.2273212262\O,0,-0.074582442,1.9550175803,2.3498667

386\C,0,-1.0514679978,0.6645345181,5.2653500385\C,0,-0.9144574149,0.43  
52098396,6.7059206923\C,0,-1.9855180265,1.6460730639,4.8006036987\C,0,  
0.0533641446,-0.5524132114,6.8718182973\C,0,-1.6911926555,1.1948190159  
,7.6389077846\C,0,-2.7212310114,2.3454592619,5.7346954306\H,0,-2.09591  
32485,1.8188060615,3.7327124679\C,0,-2.5765842832,2.1295120606,7.15071  
20954\H,0,-1.5693976739,1.0308395266,8.7128027811\H,0,-3.4399316462,3.  
097014613,5.3941894274\H,0,-3.1812868455,2.7247284671,7.8405938887\N,0  
, -0.2383519178, -0.1312748414, 4.5469405638\C,0,0.4937246397, -1.16511594  
09,8.1381542387\C,0,-0.4576733595,-1.77327612,8.9922829811\C,0,1.84778  
53052,-1.148631209,8.5475330792\C,0,-0.0654139055,-2.3552882508,10.204  
6169829\H,0,-1.5063601714,-1.7996511282,8.6839192319\C,0,2.2362046668,  
-1.7295279039,9.7620400897\H,0,2.590715605,-0.6382309907,7.9291817081\  
C,0,1.2831407935,-2.3387491901,10.5926064731\H,0,-0.8156450374,-2.8267  
37648,10.8459926905\H,0,3.2866283265,-1.6965455811,10.0650836874\H,0,1  
.5889082172,-2.7932025223,11.5390735006\C,0,4.1541463158,-0.0835129765  
,1.168208983\C,0,-0.0235768386,4.1326247178,1.2963727583\C,0,4.7127694  
7,0.098454313,-0.2561612734\H,0,5.815489146,0.0685455645,-0.2252325725  
\H,0,4.3643636286,-0.7040303344,-0.9233883763\C,0,1.136707768,4.621516  
1186,2.2351890852\H,0,1.069010415,5.7235527347,2.2748197928\H,0,0.9300  
080969,4.2467186473,3.2512128478\C,0,-1.3671622807,4.5861061687,1.9220  
835991\H,0,-1.4923541063,4.1796643137,2.9371346004\H,0,-1.3972883743,5  
.6872269695,1.9830155599\H,0,-2.2206908838,4.2599993507,1.3047378714\C  
,0,4.6121552648,-1.4533565982,1.7303438165\H,0,5.7140830821,-1.4955783  
038,1.7598020027\H,0,4.2336230622,-1.6191251437,2.7506366982\H,0,4.260  
1579021,-2.2800183433,1.091515731\C,0,4.6879463001,1.0417776473,2.1247  
836525\H,0,4.3482234353,0.8070285078,3.1471769056\H,0,5.7899738932,0.9  
64319505,2.1232472015\C,0,0.0055016633,-4.2557209273,0.8186854407\C,0,  
-4.243295748,-0.0656535871,0.9881425385\C,0,-1.1474199223,-4.721231593  
8,-0.142660873\H,0,-1.0696696693,-5.8204385437,-0.2221003651\C,0,-4.73  
54025482,-1.1856044077,0.0024249612\H,0,-5.8380613988,-1.1235441822,-0  
.02305975\H,0,-4.3719506069,-0.9300094535,-1.0064053119\C,0,-4.3005441  
014,-2.5952130266,0.3532682002\C,0,-5.0996531155,-3.4577710539,1.12925  
76617\C,0,-3.0477715335,-3.0615508843,-0.0845374944\C,0,-4.6386256326,  
-4.7383809045,1.4689817368\H,0,-6.090571628,-3.1297460268,1.4590904639  
\C,0,-2.5476027669,-4.3241487722,0.2829449525\H,0,-2.4360262719,-2.415  
1012834,-0.7173760995\C,0,-3.366738663,-5.1665027037,1.0603055409\H,0,  
-5.2746783983,-5.4071695641,2.0568202589\H,0,-3.0126755103,-6.16495109  
29,1.3365029331\C,0,1.3576602843,-4.6377444666,0.1631588762\H,0,2.2050  
749011,-4.3501910302,0.8074897993\H,0,1.4046143582,-5.729523734,0.0115  
920973\H,0,1.4801839688,-4.1426612083,-0.8119803078\C,0,-0.1184724212,  
-4.9450757383,2.1886792734\H,0,-0.087557077,-6.0399688367,2.055089607\  
H,0,0.714248667,-4.6630900373,2.8509476609\H,0,-1.0628396018,-4.685341  
8926,2.6888784456\C,0,-4.6818335747,1.3054339373,0.4118670119\H,0,-5.7  
804587711,1.3375137397,0.3170562155\H,0,-4.3772108748,2.1298178421,1.0  
779210105\H,0,-4.2383911723,1.4801054664,-0.5802482289\C,0,-4.85438088

3,-0.2629251644,2.3879003721\H,0,-4.5335663539,0.5301245966,3.07935973  
73\H,0,-5.9552467361,-0.2328749472,2.315972136\H,0,-4.5604395091,-1.22  
76241533,2.8259518451\H,0,-0.9380461739,-4.3071124577,-1.1424671795\C,  
0,0.6315765384,-2.4639793796,5.1953975282\C,0,1.8124252391,-1.58106205  
02,5.1374102539\H,0,0.1600820958,-2.766889042,4.260577751\H,0,0.494515  
7034,-3.1155776971,6.0616644338\H,0,2.1807916627,-1.2653368273,4.15986  
59568\H,0,2.5490985223,-1.6322473243,5.9406386326\C,0,0.4602380883,-0.  
9332200057,5.5080630146\H,0,4.4024432126,1.0582391086,-0.6929952554\C,  
0,0.1202228876,4.7361681835,-0.1135279965\H,0,0.1034154746,5.837531680  
5,-0.0453371601\H,0,1.0629513783,4.4312734266,-0.5898842508\H,0,-0.706  
1746303,4.4181214874,-0.7667372888\C,0,4.2655886221,2.4528961098,1.763  
5510078\C,0,3.0167911443,2.9358841214,2.1951232294\C,0,5.0754794865,3.  
2990636121,0.9810756431\C,0,2.5321513999,4.2011265773,1.8161670358\H,0  
,2.3950636721,2.3023376484,2.8315331802\C,0,4.6293693786,4.5815838095,  
0.6293082101\H,0,6.0621693168,2.9559981727,0.6536701281\C,0,3.36202092  
01,5.0271014437,1.0328038721\H,0,5.2726129905,5.2371466655,0.034525574  
3\H,0,3.0179860654,6.0257201536,0.74502999\\Version=ES64L-G09RevD.01\St  
ate=1-A\HF=-2739.5048323\RMSD=4.918e-09\Dipole=0.2676824,-0.6379606,2  
.0864132\Quadrupole=2.8276805,-0.2520993,-2.5755812,-12.1290543,-0.745  
427,-9.2405238\PG=C01 [X(C48H53N1O8Rh2)]\@

### 'TS3

1\1\GINC-SHI\_02\SP\RBPW91\GenECP\C48H53N1O8Rh2\YIN\07-Jun-2016\0\#\#p g  
enecp bpw91 geom=check scrf=(iefpcm,smd,solvent=toluene) scf=(maxcycle  
=256)\Title Card Required\0,1\Rh,0,-1.7263208019,1.7406542176,-0.372  
3337495\Rh,0,-0.2795000858,-0.148806911,0.0719736209\O,0,-0.3666259805  
,2.4165443148,-1.7433349201\C,0,0.6883997746,1.726652264,-1.9672741845  
\O,0,0.9962164836,0.6159194222,-1.3899795847\O,0,-2.6401352869,0.63797  
63219,-1.8561545616\C,0,-2.2530705837,-0.5667710371,-2.0624467201\O,0,  
-1.3136336258,-1.1695267064,-1.4210853063\O,0,-3.0339761452,1.00124440  
62,1.0394215991\C,0,-2.7461732902,-0.0955510575,1.639639337\O,0,-1.682  
3603268,-0.7944624505,1.4545253785\O,0,-0.7576231407,2.7901003915,1.08  
85489804\C,0,0.1998468483,2.2231675941,1.7243750447\O,0,0.6180924323,1  
.0200615826,1.531810187\C,0,1.6739117153,-1.9608459811,1.7911966733\C,  
0,3.0381045804,-2.4173378395,1.7043886754\C,0,1.059047039,-1.705708069  
9,3.0392724857\C,0,3.3422711156,-2.6051636852,0.3128258317\C,0,3.79277  
35839,-2.5688276896,2.8949446595\C,0,1.8141037046,-1.9018201967,4.1906  
566915\H,0,0.0228025677,-1.368993991,3.0719449422\C,0,3.1726004738,-2.  
3201990927,4.1158353586\H,0,4.8394824539,-2.879919083,2.8546562765\H,0  
,1.3627105957,-1.7270246295,5.1712669706\H,0,3.740124948,-2.4493984489  
,5.0423120666\N,0,1.1356551468,-1.7896815631,0.5313973685\C,0,4.562481  
9766,-3.1575156056,-0.2960712262\C,0,5.2549868361,-4.2397247241,0.2986  
542562\C,0,5.0744379743,-2.626859052,-1.5048239076\C,0,6.412532012,-4.  
7646898485,-0.2897349465\H,0,4.8641772582,-4.6833148148,1.2183912949\C  
,0,6.2252308549,-3.1613316882,-2.0975923513\H,0,4.5760996575,-1.765610

0931,-1.9590871103\C,0,6.9026779093,-4.2310965827,-1.4919148333\H,0,6.929083,-5.6020849991,0.1888121944\H,0,6.6045086847,-2.7288655816,-3.0282807739\H,0,7.8064604125,-4.642280187,-1.9501705433\C,0,1.6737728482,2.2548673226,-3.0368166517\C,0,0.902772785,3.037556043,2.8351008873\C,0,1.1702445171,3.5848405759,-3.629377133\H,0,1.878488333,3.9348733083,-4.3998992105\H,0,0.1829811666,3.459898418,-4.0994425359\C,0,2.4481330304,3.0837840084,2.5571762073\H,0,2.9003648543,3.6645325704,3.3809934547\H,0,2.835721634,2.0547850181,2.6341473926\C,0,0.6795712454,2.302013687,4.1809124695\H,0,1.0791987549,1.2774767087,4.1464884426\H,0,1.1872293305,2.8495817271,4.9931590749\H,0,-0.3937527839,2.2517560972,4.429138513\C,0,1.7784424819,1.1938563839,-4.1610394338\H,0,2.4874602356,1.5354102494,-4.9341314452\H,0,2.1330640151,0.2289374145,-3.7678322283\H,0,0.8018188421,1.0348767128,-4.6474833529\C,0,3.0989738597,2.4307709937,-2.3994646346\H,0,3.4639504753,1.4315464416,-2.1092775237\H,0,3.7624141503,2.7984346438,-3.2028432155\C,0,-2.9673264189,-1.3407643996,-3.1962788467\C,0,-3.7637178168,-0.6010718951,2.6902326916\C,0,-4.5156181881,-1.3439765891,-2.928688511\H,0,-4.9816158339,-1.8970652722,-3.7637926099\C,0,-5.1831964867,-0.7233570205,2.0275800334\H,0,-5.8724158105,-1.0727722066,2.817142886\H,0,-5.5070290987,0.2901133881,1.739205122\C,0,-5.2639294337,-1.6388993595,0.8216387068\C,0,-5.61617393,-2.9988432306,0.9294736113\C,0,-4.9599708997,-1.1286732846,-0.4535784379\C,0,-5.6422986368,-3.8177544908,-0.2093048345\H,0,-5.8827155148,-3.4154756089,1.906078565\C,0,-4.9410177486,-1.9415194157,-1.6015125227\H,0,-4.7173501653,-0.0683145406,-0.5531903837\C,0,-5.2982335073,-3.2976340231,-1.4659795449\H,0,-5.9345422432,-4.8682163212,-0.1170240766\H,0,-5.3191267214,-3.9450766359,-2.3485779194\C,0,-2.7103723751,-0.5796142689,-4.5221002105\H,0,-1.6360785068,-0.5685463194,-4.7707969621\H,0,-3.242768679,-1.0787840723,-5.349457342\H,0,-3.060880647,0.4613836122,-4.45629016581,-1.3439765891,-2.928688511\H,0,-4.9816158339,-1.8970652722,-3.7637926099\C,0,-5.1831964867,-0.7233570205,2.0275800334\H,0,-5.8724158105,-1.0727722066,2.817142886\H,0,-5.5070290987,0.2901133881,1.739205122\C,0,-5.2639294337,-1.6388993595,0.8216387068\C,0,-5.61617393,-2.9988432306,0.9294736113\C,0,-4.9599708997,-1.1286732846,-0.4535784379\C,0,-5.6422986368,-3.8177544908,-0.2093048345\H,0,-5.8827155148,-3.4154756089,1.906078565\C,0,-4.9410177486,-1.9415194157,-1.6015125227\H,0,-4.7173501653,-0.0683145406,-0.5531903837\C,0,-5.2982335073,-3.2976340231,-1.4659795449\H,0,-5.9345422432,-4.8682163212,-0.1170240766\H,0,-5.3191267214,-3.9450766359,-2.3485779194\C,0,-2.7103723751,-0.5796142689,-4.5221002105\H,0,-1.6360785068,-0.5685463194,-4.7707969621\H,0,-3.242768679,-1.0787840723,-5.349457342\H,0,-3.060880647,0.4613836122,-4.4562901655\C,0,-2.4362352676,-2.7809330386,-3.3146758186\H,0,-2.9472498247,-3.2945545556,-4.1468652404\H,0,-1.3554151333,-2.7915879048,-3.5231908721\H,0,-2.61606324,-3.3559786303,-2.3946002024\C,0,-3.850809606,0.4656883206,3.8117790611\H,0,-4.5960960852,0.1579144026,4.5647715702\H,0,-2.8816203647,0.5804467412,4.3247970097\H,0,-4.1453867277,1.4452500463,3.40

58961141\C,0,-3.3253577039,-1.9503212656,3.2889565072\H,0,-2.351928515  
9,-1.8648374178,3.7949935809\H,0,-4.0683492438,-2.2798568008,4.0353475  
077\H,0,-3.2375315966,-2.729594116,2.5182707253\H,0,-4.8694833119,-0.3  
019063603,-2.9916132154\C,0,0.7293440424,-3.3758532227,-0.7942338059\C  
,0,1.6328129819,-2.6212525458,-1.6997080833\H,0,-0.3294350341,-3.12678  
2962,-0.7234050339\H,0,1.0734707237,-4.3211538772,-0.3686455887\H,0,1.  
1427268979,-1.8384868924,-2.2874944395\H,0,2.3552186817,-3.2152460343,  
-2.2725081439\C,0,2.1859351788,-2.1954121735,-0.3717048616\H,0,1.07916  
40246,4.363821402,-2.8592712137\C,0,0.3177509223,4.4602458429,2.918630  
63\H,0,0.8203719729,5.0158005587,3.7289780392\H,0,0.4568937984,5.01286  
17105,1.9785113892\H,0,-0.7605602837,4.4336949477,3.1372285189\C,0,3.1  
666222991,3.3573022658,-1.20114085\C,0,2.8830328222,2.8515869301,0.080  
5477915\C,0,3.4836085806,4.7240952134,-1.3257150053\C,0,2.8491791657,3  
.6758234634,1.2200509082\H,0,2.6694053291,1.7861817957,0.1937126826\C,  
0,3.4949831656,5.5549737755,-0.1955852634\H,0,3.731998241,5.137277928,  
-2.3085974457\C,0,3.1706027131,5.038956346,1.0676885653\H,0,3.75736103  
77,6.6120796293,-0.300368985\H,0,3.176168475,5.6963152019,1.9429979682  
\Version=EM64L-G09RevA.01\State=1-A\HF=-2739.4691377\RMSD=8.017e-09\D  
ipole=0.4230684,-1.6136029,-0.5443849\Quadrupole=-12.2813631,-2.013202  
4,14.2945655,0.6915715,-6.8774205,5.133723\PG=C01 [X(C48H53N1O8Rh2)]\

#### **'TS4**

1\1\GINC-SHI\_03\FTS\RBPW91\GenECP\C48H53N1O8Rh2\YIN\01-Jun-2016\0\#\#p  
opt=(calcf,ts,noeigen) genecp bpw91\Title Card Required\0,1\Rh,-2.1  
359930703,1.3540620097,-0.3603363859\Rh,-0.1686625627,0.0087146972,0.0  
817596256\O,-1.0621124613,2.3892491879,-1.7654094283\C,0.1569187915,2.  
0633647004,-1.9837665496\O,0.7994506705,1.1103808268,-1.398720834\O,-2  
.6876246792,-0.0099020803,-1.7999157983\C,-1.9571723689,-1.0455640271,  
-1.9939443538\O,-0.8601204239,-1.3148875673,-1.3776916336\O,-3.1284884  
326,0.2740958499,1.0892752403\C,-2.5090222084,-0.6816278045,1.68315303  
57\O,-1.2856900941,-1.0224203534,1.4843101082\O,-1.505879307,2.6820052  
929,1.0660951865\C,-0.4125507883,2.4458740773,1.6896823509\O,0.3439860  
465,1.4172999898,1.5166576491\C,2.1203090753,-1.5252183869,1.749156666  
4\C,3.3301161356,-2.2929385526,1.6294021004\C,1.5679313383,-1.26480367  
04,3.0235950828\C,3.6472325765,-2.327420567,0.2286152897\C,4.009006513  
4,-2.7528202156,2.7825176206\C,2.2386992134,-1.7568606453,4.1410545935  
\H,0.6431559352,-0.6963263997,3.109834\C,3.4531563837,-2.4867381181,4.  
0295555005\H,4.9531955502,-3.2964163721,2.6927935782\H,1.8247660727,-1  
.5689697263,5.1363436098\H,3.9546069512,-2.837529555,4.9355650085\N,1.  
6475296975,-1.1229036474,0.5088390339\C,4.9652370177,-2.6626740706,-0.  
355142474\C,5.5840533037,-3.9030089747,-0.0766903161\C,5.6401459213,-1  
.7409498185,-1.1863734408\C,6.8419498721,-4.2088710351,-0.6114611581\H  
,5.0638741948,-4.6327559471,0.5503396899\C,6.8978257573,-2.0513458424,  
-1.7213042092\H,5.1836409937,-0.7679668343,-1.3874639972\C,7.502554886  
8,-3.2849861113,-1.4366901408\H,7.3052139889,-5.1739767928,-0.38763482

43\H,7.4094989082,-1.3228268577,-2.356523198\H,8.4840427371,-3.5253737  
551,-1.8544300309\C,0.9298914077,2.8609227548,-3.0619217867\C,0.037056  
8491,3.4628411789,2.7658470669\C,0.0749642434,4.0259315733,-3.59612777  
49\H,0.6378481311,4.5682725459,-4.375378305\H,-0.862570958,3.658820169  
3,-4.0398988058\C,1.5216675851,3.899654502,2.4994903627\H,1.8005453468  
,4.5896694524,3.315940799\H,2.1586309485,3.0052810591,2.5986848825\C,-  
0.0108017521,2.7481242248,4.1406770052\H,0.654541663,1.871413561,4.156  
7068771\H,0.3101016898,3.4434851709,4.9348915125\H,-1.0349502285,2.415  
4541948,4.3773852774\C,1.2640598502,1.8884040607,-4.221690562\H,1.8252  
004314,2.4211249406,-5.0081797216\H,1.8757003989,1.0435321602,-3.86938  
71137\H,0.343967786,1.4865606923,-4.6773478571\C,2.2820297903,3.389568  
094,-2.4644310063\H,2.8944282704,2.5141416779,-2.1915990543\H,2.808930  
3874,3.9127837288,-3.2826094735\C,-2.4378074987,-2.0329169005,-3.08574  
39148\C,-3.3059953544,-1.466465602,2.7534620227\C,-3.9345187379,-2.427  
0766995,-2.8177580313\H,-4.2398900234,-3.0948793838,-3.6432175972\C,-4  
.6726073209,-1.9485890844,2.1487257495\H,-5.2164979353,-2.461774649,2.  
9619643717\H,-5.2573672875,-1.0531951319,1.88131894\C,-4.5625767096,-2  
.8614699914,0.9426212924\C,-4.5976960458,-4.2652149705,1.0581181818\C,  
-4.3970797817,-2.3022861668,-0.3377173809\C,-4.4496554686,-5.074643217  
6,-0.0780634972\H,-4.751290937,-4.7258963478,2.039340999\C,-4.20164820  
39,-3.0955159128,-1.4828968407\H,-4.4052054122,-1.2156708327,-0.442940  
0789\C,-4.2410964917,-4.4965304776,-1.339181622\H,-4.4958353448,-6.163  
5801248,0.0201744251\H,-4.119701801,-5.1374537834,-2.2186757493\C,-2.3  
753480332,-1.290572231,-4.4455872965\H,-1.3404335423,-0.9997255847,-4.  
691315759\H,-2.7406318072,-1.950687934,-5.2506439607\H,-2.9952365205,-  
0.3813035592,-4.4286298007\C,-1.5490516439,-3.2889334138,-3.1378316192  
\H,-1.9175448251,-3.9687308595,-3.9251921078\H,-0.5058755963,-3.030728  
7418,-3.3757452681\H,-1.5587556248,-3.8312915822,-2.1812193644\C,-3.61  
53673282,-0.4850742978,3.913424989\H,-4.2074749366,-0.9978053336,4.690  
4599093\H,-2.6856720395,-0.1223541045,4.3824728782\H,-4.185310265,0.38  
59402621,3.5554876962\C,-2.494913117,-2.6627949441,3.2852597828\H,-1.5  
466733901,-2.3346705618,3.7357803725\H,-3.0803365088,-3.1891822221,4.0  
588073204\H,-2.2564595781,-3.3779654363,2.4845806501\H,-4.542029033,-1  
.5109386756,-2.8994140002\C,2.298584641,-3.1995245342,-1.1459906585\C,  
2.2491865837,-1.86845858,-1.8304141495\H,1.3866327517,-3.5673037733,-0  
.671541203\H,3.0538552891,-3.9362871054,-1.4279335511\H,1.2630787323,-  
1.512423018,-2.1385044849\H,3.0455320221,-1.688919629,-2.5603961864\C,  
2.5630504478,-1.5488526565,-0.4032134001\H,-0.1854910959,4.7357400317,  
-2.7979441033\C,-0.8999260103,4.685309148,2.7847771505\H,-0.57214655,5  
.3877846204,3.5704201799\H,-0.8952047268,5.2146115169,1.8210177322\H,-  
1.9369477952,4.3867930174,2.9998746741\C,2.1483558866,4.3080467207,-1.  
264773067\C,1.9894710756,3.756579435,0.0198669004\C,2.1545751492,5.710  
8084511,-1.3942903819\C,1.7761143611,4.557332787,1.1568712805\H,2.0159  
731336,2.6709446651,0.1366227025\C,1.986097993,6.5278599469,-0.2666629  
236\H,2.2992244819,6.1647598551,-2.3800504847\C,1.7869062813,5.9572216



807,0.9991370962\H,2.0069418723,7.616488404,-0.3755222732\H,1.64724864  
25,6.6034488676,1.8718529387\\Version=EM64L-G09RevA.01\State=1-A\HF=-2  
738.7590327\RMSD=4.241e-09\RMSF=2.811e-06\Dipole=2.0567433,-1.6806389,  
-0.3951476\Quadrupole=-3.7734554,-1.7021287,5.4755841,-7.3700476,-9.19  
04543,2.9845838\PG=C01 [X(C48H53N1O8Rh2)]\@

### **<sup>3</sup>TS2**

1\1\GINC-A761\SP\UBPW91\GenECP\C48H53N1O8Rh2(3)\SIOC001\12-Jun-2016\0\  
\#p genecp bpw91 geom=check scrf=(iefpcm,smd,solvent=toluene) scf=(max  
cycle=256)\Title Card Required\0,3\Rh,0,-0.8139865789,-2.2180229,0.7  
09194822\Rh,0,-0.121908315,-0.0944583891,-0.2506900483\O,0,0.754013637  
2,-2.0988642454,2.0091504838\C,0,1.5399688269,-1.0891712943,1.95467488  
26\O,0,1.4370001922,-0.1061024545,1.1274499018\O,0,-1.970437608,-1.190  
1259112,2.0668548108\C,0,-1.9763660392,0.0917263547,2.0135718457\O,0,-  
1.3227449459,0.8107308394,1.1718399647\O,0,-2.3657797745,-2.3005615252  
, -0.6396208277\C,0,-2.5074932593,-1.325155425,-1.4604030161\O,0,-1.754  
856577,-0.2856781468,-1.5218299798\O,0,0.3763519553,-3.175685376,-0.64  
74083802\C,0,1.0342957646,-2.4902919272,-1.5054659327\O,0,1.0286194984  
, -1.2041384559,-1.6028050318\C,0,-0.3303834176,2.8416503315,-1.0939276  
719\C,0,0.4632897848,4.0501848685,-1.2157006463\C,0,-1.755413841,2.960  
1751311,-1.0627295333\C,0,1.9072455991,3.7771145547,-1.227902576\C,0,-  
0.1658723346,5.3004293799,-1.2757872397\C,0,-2.348941857,4.2196981484,  
-1.1462091802\H,0,-2.3565472159,2.0556901876,-0.9801105555\C,0,-1.5680  
569708,5.38992328,-1.2506246812\H,0,0.442171605,6.2055781034,-1.360615  
2558\H,0,-3.4400715573,4.296182878,-1.1260943554\H,0,-2.0524443886,6.3  
677201382,-1.3194788361\N,0,0.3488613388,1.6754732947,-1.0201066499\C,  
0,2.8560527593,4.5809206524,-0.4426347123\C,0,2.4256135921,5.324917346  
1,0.6876704573\C,0,4.2285903168,4.6537650425,-0.7941941602\C,0,3.32690  
58894,6.0924374165,1.4326347264\H,0,1.3772874583,5.2721929036,0.990598  
399\C,0,5.1264087265,5.4242003671,-0.0491902515\H,0,4.583090439,4.1198  
730422,-1.6773035952\C,0,4.6824170352,6.1478904063,1.069829404\H,0,2.9  
706924026,6.6448430037,2.3072139903\H,0,6.1779567801,5.4678542271,-0.3  
479103047\H,0,5.385680714,6.7505737988,1.6514079268\C,0,2.7007612203,-  
1.0219427975,2.9721644579\C,0,1.8970640228,-3.266905121,-2.5272871573\  
C,0,2.6938778987,-2.2630152341,3.8851999885\H,0,3.5151822289,-2.182399  
846,4.6177368059\H,0,1.7463180809,-2.344596719,4.4388948471\C,0,3.3932  
308813,-2.8019576038,-2.4167988476\H,0,3.9621030801,-3.3912402503,-3.1  
58006982\H,0,3.4437016979,-1.748284544,-2.7379121789\C,0,1.3868261529,  
-2.9202474685,-3.9486166299\H,0,1.4355732238,-1.8376412374,-4.13866125  
3\H,0,2.0034950915,-3.4370651637,-4.7031608485\H,0,0.3433488714,-3.249  
5582228,-4.0839914973\C,0,2.5141076213,0.2595959032,3.8236900532\H,0,3  
.3474555506,0.3557043345,4.5399960316\H,0,2.4893210594,1.159239657,3.1  
906126211\H,0,1.5764394264,0.214597058,4.401837348\C,0,4.0668866025,-0  
.9051202236,2.2058801477\H,0,4.0780434553,0.0650820441,1.682255097\H,0  
,4.8580230962,-0.8660949145,2.9756626409\C,0,-2.8345948287,0.831043852

,3.0656300901\C,0,-3.6775796755,-1.4201410499,-2.4660430144\C,0,-4.3225792173,0.3361374445,2.9541867186\H,0,-4.9006754841,0.9033432809,3.7053933797\C,0,-5.027387206,-1.5499733135,-1.6703906433\H,0,-5.8343428241,-1.598359719,-2.4231819938\H,0,-5.0159910747,-2.5191466727,-1.1450156749\C,0,-5.3070185048,-0.441739171,-0.6734311175\C,0,-6.0503717956,0.7064408613,-1.01188772\C,0,-4.7995963211,-0.5449579132,0.6350786873\C,0,-6.2567536041,1.722043147,-0.0661558327\H,0,-6.4829031796,0.7983828473,-2.0132514032\C,0,-4.9608443336,0.4797092959,1.5861394979\H,0,-4.2538488304,-1.4476194793,0.9197169435\C,0,-5.708361561,1.616701934,1.220902321\H,0,-6.8537027493,2.5996032929,-0.3326889583\H,0,-5.8743342754,2.4150724782,1.9511493756\C,0,-2.303000106,0.4408882876,4.4683066583\H,0,-1.2672703162,0.7918043755,4.6086582116\H,0,-2.9264603689,0.9115243948,5.247250727\H,0,-2.322570007,-0.6496607189,4.612956439\C,0,-2.7469583354,2.35782706,2.8845864977\H,0,-3.3492584169,2.8536898845,3.6651058175\H,0,-1.7079372647,2.7083369383,2.97654919\H,0,-3.118872991,2.6773780785,1.9009392188\C,0,-3.4823884966,-2.7120338769,-3.2996246455\H,0,-4.3288002942,-2.8375958379,-3.9957707398\H,0,-2.5584129498,-2.6580715152,-3.8986732075\H,0,-3.4248927883,-3.5996824556,-2.6520687235\C,0,-3.7096379945,-0.1988488404,-3.4039005125\H,0,-2.7658719536,-0.1006055669,-3.9613812369\H,0,-4.5294873868,-0.3187677203,-4.1325259556\H,0,-3.8723477298,0.7378379676,-2.8520143411\H,0,-4.3478443966,-0.7234173063,3.2578637605\C,0,3.3274603359,1.6782428839,-2.2159297661\C,0,2.1203041462,1.8617223544,-3.1434651825\H,0,3.3992931085,0.7175418746,-1.6982113598\H,0,4.2973431993,2.0991122994,-2.5015328105\H,0,1.4384074356,1.0161906643,-3.260454093\H,0,2.2430376434,2.486416303,-4.0359633749\C,0,2.2065576482,2.5580642115,-1.8268028429\H,0,2.8291477253,-3.1907556818,3.3107251787\C,0,1.7826207811,-4.7852931124,-2.2903596143\H,0,2.3849374486,-5.319016082,-3.045443413\H,0,2.1434107984,-5.0701920188,-1.29163245\H,0,0.7394423951,-5.1240465,-2.3796953403\C,0,4.3585891564,-2.0158778047,1.2150828727\C,0,3.8413096696,-1.9275907749,-0.0896040153\C,0,5.1254241429,-3.1486863407,1.5508949232\C,0,4.0264102428,-2.9423001287,-1.0453939641\H,0,3.2635240092,-1.042504486,-0.3632857503\C,0,5.3469917843,-4.1604795554,0.6045055138\H,0,5.5610340562,-3.2334800557,2.5515894544\C,0,4.7971821448,-4.0641618141,-0.6826945791\H,0,5.9556236804,-5.0297199825,0.8712862085\H,0,4.9779488123,-4.8587358136,-1.4136292465\Version=ES64L-G09RevD.01\State=3-A\HF=-2739.40918\S2=2.020049\S2-1=0.\S2A=2.000237\RMSD=6.602e-09\Dipole=0.290626,0.6956235,-0.2063146\Quadrupole=0.9672627,-5.0806762,4.1134135,-3.2773368,3.1212071,11.0096131\PG=C01 [X(C48H53N1O8Rh2)]\@

### **<sup>3</sup>IN3**

1\1\GINC-SHI\_02\SP\UBPW91\GenECP\C48H53N1O8Rh2(3)\YIN\04-Jun-2016\0\#\p genecp bpw91 scrf=(iefpcm,smd,solvent=toluene) scf=(maxcycle=256) geom=check\Title Card Required\0,3\rh,0,-0.0344905891,-0.051362421,0.0121243949\rh,0,0.0158225264,0.0358409968,2.4346321978\o,0,2.0084519083

, -0.0519531057, -0.0131155559\C, 0, 2.644387701, -0.0193938048, 1.097825623  
2\O, 0, 2.1021674266, 0.0116364333, 2.266966587\O, 0, -0.0139789847, -2.10058  
71708, 0.1197576893\C, 0, -0.0309905849, -2.6582036352, 1.2759384247\O, 0, -0  
.0231374239, -2.0359483823, 2.4005392646\O, 0, -2.0868829074, -0.0342297782  
, 0.0965611682\C, 0, -2.658522966, -0.023377878, 1.246953225\O, 0, -2.0509651  
637, 0.0094758312, 2.3790181237\O, 0, -0.0265532438, 1.9878967089, -0.046007  
6347\C, 0, -0.0079180333, 2.6403430063, 1.0559803087\O, 0, -0.0010145851, 2.1  
139484629, 2.232413144\C, 0, -1.0001990618, 0.7190466485, 5.2613113956\C, 0,  
-1.0923062079, 0.156643759, 6.5851967596\C, 0, -1.859201087, 1.7576910848, 4  
.8590208241\C, 0, -0.0457137952, -0.8227109499, 6.7132321124\C, 0, -2.050747  
7746, 0.6617689378, 7.4855856387\C, 0, -2.8139847774, 2.2377648947, 5.776072  
8546\H, 0, -1.7656185413, 2.1838636215, 3.861627093\C, 0, -2.9082848027, 1.69  
94859344, 7.070724896\H, 0, -2.1126174542, 0.2784344048, 8.5064019955\H, 0, -  
3.4822340904, 3.0505121491, 5.4776406132\H, 0, -3.6474319924, 2.0969249586,  
7.7719324667\N, 0, 0.0192900094, 0.1341249946, 4.5322651312\C, 0, 0.09810092  
76, -1.7958547511, 7.779086739\C, 0, -1.0584384925, -2.26675631, 8.471195148  
6\C, 0, 1.3528086339, -2.3384900339, 8.1862635307\C, 0, -0.9636321659, -3.199  
8584711, 9.505177918\H, 0, -2.0430939307, -1.9253842656, 8.1452670438\C, 0, 1  
.4407779696, -3.2703726242, 9.2242247718\H, 0, 2.2749547056, -1.9992286898,  
7.7119426927\C, 0, 0.2873817015, -3.7075920841, 9.8962736627\H, 0, -1.875162  
3094, -3.5472128477, 10.0008246506\H, 0, 2.4228653043, -3.6528001742, 9.5181  
472121\H, 0, 0.3615573759, -4.436682267, 10.7076458143\C, 0, 4.1893402316, -0  
.0451089834, 1.0451736207\C, 0, -0.0152009157, 4.1843855056, 0.9809797712\C  
, 0, 4.6826829779, -0.0448920044, -0.4144039859\H, 0, 5.7851421755, -0.087001  
6341, -0.4274442876\H, 0, 4.2983772843, -0.9181682175, -0.962818276\C, 0, 1.2  
054438859, 4.7587875882, 1.7863157658\H, 0, 1.1373870278, 5.8592311798, 1.71  
96297693\H, 0, 1.0680937105, 4.4894850454, 2.8466151575\C, 0, -1.3150899551,  
4.6910230012, 1.6560672909\H, 0, -1.3667139678, 4.3782146823, 2.7098877945\  
H, 0, -1.3470831955, 5.7928962295, 1.6204947184\H, 0, -2.2080087089, 4.310947  
1838, 1.1329244363\C, 0, 4.6691569179, -1.3358802293, 1.7568419835\H, 0, 5.77  
13906906, -1.375846448, 1.7515633619\H, 0, 4.3250903594, -1.3693069647, 2.80  
15207422\H, 0, 4.2980786212, -2.2347820028, 1.2375272217\C, 0, 4.7669921402,  
1.1874523878, 1.8296640682\H, 0, 4.4954258134, 1.0700778026, 2.8919971469\H  
, 0, 5.86726883, 1.1132589784, 1.7677480183\C, 0, -0.0269529597, -4.203836677  
3, 1.3084012653\C, 0, -4.2045482447, -0.011955429, 1.2613334375\C, 0, -1.1908  
600971, -4.7532632375, 0.4071931352\H, 0, -1.1143188992, -5.854900147, 0.432  
8139893\C, 0, -4.7488164941, -1.1813252745, 0.3642411247\H, 0, -5.8503722444  
, -1.1008924854, 0.3760445487\H, 0, -4.4202888024, -0.9956943958, -0.6716077  
898\C, 0, -4.323720198, -2.5728196823, 0.7915145113\C, 0, -5.1202648504, -3.3  
764157059, 1.6307462045\C, 0, -3.0811393502, -3.0786276446, 0.3682732367\C,  
0, -4.665893423, -4.6367261678, 2.0462257865\H, 0, -6.1030676615, -3.0179849  
965, 1.9530890985\C, 0, -2.5852840542, -4.3175356113, 0.813669705\H, 0, -2.47  
53614087, -2.4832964987, -0.3178561075\C, 0, -3.4017058703, -5.1005033678, 1  
.6533434029\H, 0, -5.299323612, -5.2598023922, 2.6847407706\H, 0, -3.0511316  
566, -6.0803358655, 1.9931254115\C, 0, 1.3181002915, -4.6747425585, 0.696316

0032\H,0,2.1714039831,-4.3252553891,1.300745725\H,0,1.3506079409,-5.77  
70069352,0.6733205378\H,0,1.4417022178,-4.2985802479,-0.3306014564\C,0  
, -0.1568548724,-4.7303794527,2.7498104204\H,0,-0.1481451562,-5.8336237  
097,2.7384058917\H,0,0.6804344752,-4.3885076675,3.3760176778\H,0,-1.09  
03435282,-4.3951838055,3.2238735601\C,0,-4.6605217487,1.3301323907,0.6  
310230396\H,0,-5.7622457024,1.3675496541,0.5935953686\H,0,-4.315094576  
1,2.1867801517,1.233024488\H,0,-4.2714846906,1.4438833236,-0.392504606  
5\C,0,-4.7477422931,-0.1252263427,2.6976124076\H,0,-4.3875541007,0.700  
7613972,3.3277072518\H,0,-5.8504004982,-0.0898459695,2.6754374589\H,0,  
-4.4399927371,-1.0674167478,3.17335471\H,0,-0.9931611221,-4.4384267509  
, -0.6308088774\C,0,1.7749112155,-1.7189152958,4.9754286244\C,0,2.31350  
28642,-0.4256020024,5.5111455059\H,0,1.8177744183,-1.873002567,3.89839  
81027\H,0,1.8595185249,-2.6260173114,5.5791077768\H,0,2.6721054144,0.3  
069355675,4.7858448966\H,0,2.7764942437,-0.376014311,6.4994018802\C,0,  
0.7747617799,-0.689991582,5.4651540926\H,0,4.3621827367,0.8581829885,-  
0.9533788653\C,0,0.0238810256,4.6534250194,-0.4861436689\H,0,0.0079086  
64,5.7562345697,-0.5190252148\H,0,0.9302939322,4.3029648119,-1.0001231  
44\H,0,-0.8470639989,4.2797349575,-1.0455036488\C,0,4.3075764756,2.546  
4049715,1.3382462492\C,0,3.0884201316,3.0755285022,1.7997883266\C,0,5.  
0537791765,3.2993288373,0.4104703385\C,0,2.5696698814,4.2913725244,1.3  
182015308\H,0,2.5191232387,2.518883453,2.5479315891\C,0,4.5750900527,4  
.5350598728,-0.0490329782\H,0,6.0178140368,2.9220665245,0.0545308318\C  
,0,3.3366982247,5.0245310162,0.3916444883\H,0,5.1704851571,5.119773932  
6,-0.7566457223\H,0,2.9681322052,5.9866520652,0.0218591922\\Version=EM  
64L-G09RevA.01\State=3-A\HF=-2739.4630162\S2=2.008884\S2-1=0.\S2A=2.00  
005\RMSD=4.972e-09\Dipole=0.2148563,-0.2076575,0.2326551\Quadrupole=8.  
6123022,5.208665,-13.8209671,-10.9461823,-3.7185138,-9.8013841\PG=C01  
[X(C48H53N1O8Rh2)]\@

### <sup>3</sup>TS5

1\1\GINC-A739\FTS\UBPW91\GenECP\C48H53N1O8Rh2(3)\SIOC001\07-Jun-2016\0  
\#p opt=(calcf,ts,noeigen) genecp bpw91\\Title Card Required\\0,3\Rh  
, -0.1281618659,-2.46358233,0.2176836154\Rh,-0.0266270604,-0.0476890053  
,0.1279389255\O,1.316781099,-2.4511683386,1.6529237632\C,1.7933651931,  
-1.3329337385,2.0559783949\O,1.447072741,-0.1723731837,1.612713039\O,-  
1.5450251344,-2.3175027805,1.6984311342\C,-1.91485322,-1.1488670779,2.  
0796969657\O,-1.4667131872,-0.0388693177,1.612151462\O,-1.5757757472,-  
2.4325579667,-1.2363764632\C,-1.942761913,-1.295600692,-1.7079983289\O  
, -1.481791061,-0.1555576714,-1.3382632896\O,1.2855299732,-2.5542078084  
, -1.2452208318\C,1.7531414283,-1.465928677,-1.7334170895\O,1.421438330  
2,-0.2769746514,-1.3619850599\C,-1.2357409828,2.8061208561,-0.19452970  
95\C,-0.9126324671,4.1535647538,-0.5735394885\C,-2.5693181511,2.397198  
9706,-0.0768070143\C,0.5248302,4.2479391972,-0.5960982513\C,-1.9414086  
889,5.0568320859,-0.8895943803\C,-3.5905769507,3.3319514834,-0.3634401  
765\H,-2.8141932227,1.3821935403,0.2279586688\C,-3.2835610792,4.636252

5618,-0.7742603972\H,-1.7077079717,6.0678325053,-1.2330146796\H,-4.633  
7996814,3.0193566411,-0.2701259254\H,-4.0886895275,5.3381330179,-1.009  
5663559\N,-0.0667733388,2.0611999151,0.0073286341\C,1.3246579984,5.419  
0845617,-0.9419943057\C,0.9492126028,6.7094264722,-0.4786197738\C,2.48  
93104801,5.3250043837,-1.750137578\C,1.7074474,7.8409658523,-0.7965161  
32\H,0.0742633986,6.8059327422,0.1691250853\C,3.2430622201,6.460195875  
4,-2.0669886658\H,2.7699230757,4.3567367688,-2.1721545635\C,2.86052035  
11,7.7247726113,-1.5902048812\H,1.4024123347,8.8195293074,-0.413721891  
\H,4.1281667424,6.3593650019,-2.7021862426\H,3.4519813449,8.6104080975  
, -1.8383145617\C,2.8605205463,-1.3845878116,3.1744894442\C,2.792338793  
2,-1.591230899,-2.8716872233\C,3.0273511689,-2.8283142555,3.6888379216  
\H,3.7708616229,-2.841134332,4.5040754153\H,2.0784685307,-3.2227829342  
,4.083347895\C,4.1728005827,-1.010109846,-2.3934322086\H,4.8867715755,  
-1.1767467347,-3.2195378366\H,4.0595739571,0.0815016753,-2.2827679781\  
C,2.3052152564,-0.7484060712,-4.0763489483\H,2.151365451,0.3036725911,  
-3.79387738\H,3.0518289928,-0.7905350674,-4.8872194539\H,1.3544744699,  
-1.1404112066,-4.4735051203\C,2.4051869346,-0.4662583409,4.3350561312\  
H,3.165709288,-0.4711708103,5.13388706\H,2.2640003634,0.5703199079,3.9  
950523618\H,1.4563387374,-0.8196167811,4.7711970682\C,4.2290542998,-0.  
837385704,2.626582815\H,4.1106034792,0.2439432248,2.4445976358\H,4.961  
1246579,-0.9477317974,3.4462901217\C,-2.9731172209,-1.0792889592,3.203  
428224\C,-3.0144254639,-1.3116358349,-2.8205369848\C,-4.2576894684,-1.  
8642980679,2.7493932334\H,-4.987988647,-1.7765405738,3.573471392\C,-4.  
2928565544,-2.0575874011,-2.2908707528\H,-5.0348629758,-2.0311427393,-  
3.1087110608\H,-4.0232708062,-3.1147782026,-2.1317073871\C,-4.89984911  
39,-1.5000679258,-1.0173794505\C,-5.9355258512,-0.5451443848,-1.032004  
5036\C,-4.4129196481,-1.9348253323,0.2294564328\C,-6.447032911,-0.0343  
686829,0.1706316976\H,-6.353288276,-0.2112091179,-1.9870449642\C,-4.88  
26541036,-1.4049203788,1.4457776772\H,-3.638253743,-2.7048129249,0.254  
4523779\C,-5.918608063,-0.4509694958,1.4019632025\H,-7.2665152414,0.69  
04227529,0.1482342851\H,-6.3229952615,-0.0441558965,2.3342314908\C,-2.  
3890139752,-1.7950643262,4.4480658322\H,-1.4953828622,-1.2687625331,4.  
8221572766\H,-3.1379685501,-1.8049076376,5.2578075552\H,-2.1089331038,  
-2.8336625464,4.216341577\C,-3.316576855,0.3795474343,3.5564206947\H,-  
4.0451840392,0.3937668488,4.3848575068\H,-2.4206326865,0.9326088296,3.  
8763005596\H,-3.7533407532,0.916275118,2.7023540995\C,-2.4458983163,-2  
.1228753352,-4.0128815187\H,-3.2049103461,-2.1933153876,-4.8101948039\  
H,-1.5572041577,-1.6272531901,-4.4370211766\H,-2.1633309586,-3.1409669  
319,-3.7055412061\C,-3.3584524698,0.1161060542,-3.2831104704\H,-2.4676  
722336,0.63023594,-3.6746083839\H,-4.1106479744,0.067948569,-4.0889487  
707\H,-3.7609184345,0.7294555067,-2.4649998914\H,-3.9878452455,-2.9301  
418862,2.6677860336\C,2.052044613,3.0616456622,1.4421180228\C,2.421908  
2837,2.5343215873,0.1043031171\H,1.629844376,2.3934185705,2.1904815326  
\H,2.234839104,4.10558055,1.6970556009\H,2.5703174447,1.4548978273,0.0  
405069858\H,3.183669115,3.0976275081,-0.4448667275\C,1.0092196065,2.95

17613311,-0.1383659156\H,3.3676714259,-3.5065551043,2.8936328154\C,2.9  
493006461,-3.0650454878,-3.2950688905\H,3.6746777578,-3.1312302122,-4.  
1239042456\H,3.3073411484,-3.6909268031,-2.465357384\H,1.9919410263,-3  
.4828931732,-3.6420629312\C,4.746690314,-1.5002307941,1.3647512035\C,4  
.3345043809,-1.0013497987,0.1177418117\C,5.620951975,-2.6045217097,1.3  
784377185\C,4.7179775083,-1.5857133741,-1.1008596966\H,3.6874618149,-0  
.1236242359,0.0949857423\C,6.0427444648,-3.1875127182,0.1734074809\H,5  
.9842952518,-3.0006909819,2.3318529691\C,5.5911754158,-2.6898521256,-1  
.0588242205\H,6.7339853111,-4.0353151584,0.1946182632\H,5.9313899566,-  
3.1523324909,-1.9906344476\\Version=ES64L-G09RevD.01\State=3-A\HF=-273  
8.7299275\S2=2.014158\S2-1=0.\S2A=2.000107\RMSD=7.176e-09\RMSF=2.790e-  
06\Dipole=0.218943,0.4138075,0.0098327\Quadrupole=4.2954749,-8.7256943  
,4.4302193,-1.7698269,-2.2099956,0.1691856\PG=C01 [X(C48H53N1O8Rh2)]\

### <sup>3</sup>IN4

1\1\GINC-SHI\_02\SP\UBPW91\GenECP\C48H53N1O8Rh2(3)\YIN\06-Jun-2016\0\#\#  
p genecp bpw91 scrf=(iefpcm,smd,solvent=toluene) scf=(maxcycle=256) ge  
om=check\rh2esp2\_3m\_prim\_radical\_3\0,3Rh,0,-0.024679012,-0.03313764  
2,-0.0491276139\rh,0,-0.2046263502,-0.2611476147,2.3505323096\O,0,2.00  
86023713,-0.065124445,0.1171221506\C,0,2.5334774866,-0.1815474868,1.28  
02059551\O,0,1.8808143954,-0.2923776133,2.3860187618\O,0,-0.0268046499  
, -2.0791962008,-0.206289778\C,0,-0.1519688263,-2.7837435181,0.86104052  
11\O,0,-0.2486041786,-2.3126333357,2.0531733492\O,0,-2.077150584,0.013  
2188066,-0.153304971\C,0,-2.7556716698,-0.1252267534,0.9286108327\O,0,  
-2.2578917215,-0.2547053762,2.1064432998\O,0,0.0078912062,1.998050683,  
0.1662438225\C,0,-0.0659378885,2.4955072679,1.3449561666\O,0,-0.176124  
0687,1.8144201182,2.4328997341\C,0,-1.2132227068,0.4337131148,5.223855  
8196\C,0,-0.9890784453,0.1947601869,6.6137112022\C,0,-2.1642437813,1.3  
649711554,4.7992283398\C,0,0.0577007142,-0.8016868167,6.6876724324\C,0  
, -1.6970507617,0.9348384636,7.5776349812\C,0,-2.8892942333,2.075102255  
6,5.7792436064\H,0,-2.3376082168,1.5366220427,3.7390228344\C,0,-2.6542  
09944,1.8711412959,7.1494090439\H,0,-1.4991696407,0.7962605107,8.64368  
49436\H,0,-3.6408702924,2.8037326542,5.4619686609\H,0,-3.2161930617,2.  
4468418396,7.8900170561\N,0,-0.3484000006,-0.3786823002,4.4574642407\C  
,0,0.6227784354,-1.3663704737,7.9150550786\C,0,-0.2176726434,-1.680015  
7967,9.014458527\C,0,2.0152584907,-1.5922701421,8.0613604303\C,0,0.311  
2158985,-2.1981875857,10.2019231401\H,0,-1.2977288714,-1.5495942631,8.  
9115838713\C,0,2.5418661668,-2.0994896049,9.2536615927\H,0,2.687561890  
7,-1.3274018962,7.2425706138\C,0,1.6935764038,-2.4075460827,10.3298756  
218\H,0,-0.3597061289,-2.4452273703,11.0299151051\H,0,3.6213262365,-2.  
2507043989,9.346235478\H,0,2.1066845115,-2.8077566361,11.260021024\C,0  
,4.0764222472,-0.2227718699,1.3702552686\C,0,-0.0517375568,4.034907196  
5,1.4818578775\C,0,4.7060569767,0.0127577949,-0.0163682924\H,0,5.80519  
06741,-0.0347831495,0.0683027379\H,0,4.3824558523,-0.7551763372,-0.734  
9233461\C,0,1.0659476129,4.4687361317,2.4966895167\H,0,1.0074985223,5.

5687382034,2.5776677572\H,0,0.8037125297,4.0561333898,3.4848145294\C,0  
,-1.4213536924,4.47081223,2.0630974074\H,0,-1.5979986616,4.0176334472,  
3.0501752331\H,0,-1.4447032225,5.567963016,2.174358357\H,0,-2.24648315  
73,4.1831936481,1.390684536\C,0,4.4829732026,-1.6240872391,1.893347769  
2\H,0,5.5810151916,-1.6858084448,1.9779460389\H,0,4.0458658874,-1.8248  
960092,2.8830692343\H,0,4.1535174577,-2.4156510436,1.2003386082\C,0,4.  
5778529358,0.8506173435,2.4013108638\H,0,4.1878085823,0.5747831464,3.3  
949571418\H,0,5.6774840603,0.7561640551,2.4466259917\C,0,-0.154772258,  
-4.3200857515,0.6930163703\C,0,-4.2962568938,-0.0989869033,0.800739335  
9\C,0,-1.2221079395,-4.7294138873,-0.3847381528\H,0,-1.1503272797,-5.8  
257518636,-0.4984361504\C,0,-4.7548607393,-1.1327057428,-0.2897834974\  
H,0,-5.8524585327,-1.0384653109,-0.3703148297\H,0,-4.3303050657,-0.816  
5027024,-1.2569086489\C,0,-4.37534083,-2.5750821677,-0.0147924836\C,0,  
-5.2532718881,-3.4745123264,0.6216435693\C,0,-3.0964868266,-3.03574769  
41,-0.3772474387\C,0,-4.8435498529,-4.7863620887,0.9023602561\H,0,-6.2  
633278368,-3.1495691224,0.8910273282\C,0,-2.6494562407,-4.3316152579,-  
0.0620823536\H,0,-2.4236371374,-2.359185017,-0.9079508818\C,0,-3.54703  
59425,-5.2104279472,0.5756007252\H,0,-5.5380866983,-5.4818189959,1.383  
1182076\H,0,-3.2329868255,-6.2326257673,0.8100012405\C,0,1.2447428679,  
-4.7303821583,0.1649863674\H,0,2.0319695159,-4.4753353589,0.8935060223  
\H,0,1.2755454531,-5.8212146225,0.0042587405\H,0,1.4753127,-4.22921579  
09,-0.7876334441\C,0,-0.4339416078,-5.0249184618,2.0333987808\H,0,-0.4  
121384577,-6.1178260388,1.8827590339\H,0,0.3235979265,-4.7678535981,2.  
788759009\H,0,-1.4191400828,-4.7504958519,2.4370527417\C,0,-4.69409296  
31,1.3195654389,0.3160985789\H,0,-5.7887816423,1.3778084019,0.19393411  
23\H,0,-4.3963802446,2.086650239,1.0500811671\H,0,-4.2206257791,1.5593  
220307,-0.6482429023\C,0,-4.9701186518,-0.3979551383,2.1530535012\H,0,  
-4.6830921014,0.3400674122,2.9163960517\H,0,-6.0661418472,-0.359579714  
3,2.0315972827\H,0,-4.6975310516,-1.3939621109,2.5307091463\H,0,-0.921  
1553597,-4.2827202075,-1.3466676336\C,0,1.2628260068,-3.4698788416,5.5  
574126455\C,0,1.397858261,-2.1467188078,4.8710514772\H,0,0.2834249039,  
-3.8452302181,5.8575681138\H,0,2.1250784665,-4.1299339663,5.6682186007  
\H,0,1.2651807981,-2.2624447759,3.7797444444\H,0,2.4293916439,-1.76256  
7525,4.9889476145\C,0,0.4046292059,-1.1066727522,5.3338174824\H,0,4.43  
13116873,0.9954348388,-0.4257252457\C,0,0.1638242587,4.6980927421,0.10  
80570065\H,0,0.1547015518,5.795073496,0.2264097191\H,0,1.1244422623,4.  
4047608955,-0.3391981963\H,0,-0.6350045445,4.421790276,-0.5966451012\C  
,0,4.1906122139,2.2819944182,2.083751209\C,0,2.9278096677,2.7623235919  
,2.4760739499\C,0,5.0462353625,3.1499679289,1.3773239662\C,0,2.4752081  
311,4.0479605691,2.1281469192\H,0,2.2718908553,2.1113649966,3.05856869  
39\C,0,4.6312184589,4.4517856513,1.0602619042\H,0,6.0434646923,2.80845  
89048,1.0817631187\C,0,3.3506306423,4.8957801798,1.4213694787\H,0,5.30  
91009137,5.1236593075,0.5252701097\H,0,3.0326081709,5.9104975294,1.161  
1733496\\Version=EM64L-G09RevA.01\State=3-A\HF=-2739.4702094\S2=2.0073  
71\S2-1=0.\S2A=2.000034\RMSD=5.042e-09\Dipole=0.2828001,-0.1813207,0.2

785999\Quadrupole=8.2652295,2.5522681,-10.8174976,-11.4333623,-0.4911638,-5.2898942\PG=C01 [X(C48H53N108Rh2)]\@

### **<sup>3</sup>TS6**

1\1\GINC-SHI\_02\FTS\UBPW91\GenECP\C48H53N108Rh2(3)\YIN\13-Jun-2016\0\#\p opt=(calcfc,ts,noeigen) genecp bpw91\Title Card Required\0,3\Rh,-1.530511554,1.6219777572,-0.4745738525\Rh,-0.1030060486,-0.2096906348,0.1581425955\O,-0.1821737897,2.1398435278,-1.925511938\C,0.8933400633,1.4507549953,-2.0598103264\O,1.2166165951,0.4251168224,-1.3570596186\O,-2.5665495982,0.5456423058,-1.8590161421\C,-2.3035702217,-0.7044319178,-2.0802115574\O,-1.3897938862,-1.3543853319,-1.4942373564\O,-2.8437400595,1.0513866203,1.0129525129\C,-2.595321014,-0.010916159,1.6953109409\O,-1.5524217714,-0.7456563312,1.5736145864\O,-0.6574973006,2.9275976728,0.8002080896\C,0.3153978927,2.5633837344,1.5735100496\O,0.774763684,1.3851065175,1.6374120861\C,1.7922132871,-1.8845545131,2.0142826405\C,3.0936468785,-2.4993653454,1.9585558155\C,1.2586230632,-1.3867204981,3.2253038645\C,3.3206802216,-2.9082635083,0.5981656927\C,3.8767399124,-2.565826025,3.1369576696\C,2.0370537322,-1.5018857037,4.37198658\H,0.2701364892,-0.9277430296,3.2352852392\C,3.3371288874,-2.0784947903,4.3243509757\H,4.8821406497,-2.9931836549,3.1138892641\H,1.6509194437,-1.135046486,5.3268736743\H,3.9256840901,-2.1369962314,5.2446794798\N,1.2334683141,-1.8272110169,0.7512063402\C,4.4410262587,-3.689379928,0.0505574096\C,4.9992312101,-4.7695837585,0.7752912724\C,4.9795209882,-3.3937720008,-1.2247299421\C,6.0539169266,-5.5227458803,0.2446312993\H,4.5816988919,-5.0309985159,1.7513960237\C,6.0280843914,-4.1547184568,-1.7569608238\H,4.5868375672,-2.5386750867,-1.7824043343\C,6.5720339523,-5.2214495125,-1.024634355\H,6.4669239065,-6.355325928,0.8217182176\H,6.4322615415,-3.9035658135,-2.7420049048\H,7.3955454988,-5.8103645199,-1.4379070139\C,1.8768964954,1.8784482563,-3.1732505541\C,0.9319464971,3.6571370447,2.4792800896\C,1.3394010058,3.0991688001,-3.9435010207\H,2.0537198166,3.3764094206,-4.7377512261\H,0.370236312,2.8749216254,-4.4146625571\C,2.480723604,3.7064284997,2.2253196508\H,2.8961970963,4.4510663449,2.927817271\H,2.8960792568,2.7249637993,2.5077072221\C,0.7014956151,3.2297920534,3.9506554416\H,1.1445844031,2.2420389296,4.1490320629\H,1.1617822286,3.9652772674,4.6322493857\H,-0.3753935426,3.1823953097,4.1833255196\C,2.0468132972,0.6836901964,-4.1449644781\H,2.7547245874,0.9502547974,-4.9478777246\H,2.433308119,-0.2036282126,-3.6211583898\H,1.0863856572,0.4179195393,-4.6169802172\C,3.2777021004,2.1913239601,-2.5346198409\H,3.6520859491,1.2623814766,-2.0728788393\H,3.9585152415,2.436330982,-3.3695587928\C,-3.1784536482,-1.3898062671,-3.1613580455\C,-3.6327555894,-0.3984209872,2.775118293\C,-4.6976615294,-1.2180372119,-2.8038503188\H,-5.2719096198,-1.7340416754,-3.5944721157\C,-5.0768823587,-0.3959797699,2.1593988906\H,-5.7703545358,-0.6520138479,2.9805183002\H,-5.3098705785,0.6358076745,1.849400544\C,-5.2941417602,-1.3330221495,0.9858255796\C,-5.7830164297,-2.6444077386,1.150975368\C,-



4.9929887464,-0.8941077547,-0.3165121418\C,-5.9434579038,-3.4870258924  
,0.0408720183\H,-6.0522329355,-3.0024253937,2.1499535028\C,-5.11140148  
03,-1.7344581226,-1.4386581897\H,-4.6424605854,0.1299771252,-0.4591182  
084\C,-5.60222155,-3.0409348386,-1.2447722843\H,-6.3406180349,-4.49744  
05487,0.1783053134\H,-5.730842858,-3.7063558378,-2.1045715699\C,-2.917  
7541792,-0.6741111811,-4.5108041748\H,-1.863731234,-0.7802446202,-4.81  
73072772\H,-3.5452882439,-1.120449463,-5.3011359838\H,-3.150737795,0.3  
991184345,-4.4422384067\C,-2.8132735739,-2.8802766379,-3.2860210539\H,  
-3.4255236447,-3.348779209,-4.0756628883\H,-1.7534296643,-3.0058354145  
, -3.5559257323\H,-2.9901847521,-3.4214377938,-2.344849158\C,-3.5785865  
999,0.6918262108,3.8770659409\H,-4.3152438518,0.4644158213,4.666266983  
4\H,-2.581514185,0.7306150068,4.3461059166\H,-3.8049702477,1.686263117  
3,3.4629037597\C,-3.3035335413,-1.7732170364,3.3865567475\H,-2.3079551  
017,-1.7744827881,3.8546430553\H,-4.0484074669,-2.0185956326,4.1628005  
734\H,-3.3205386185,-2.568587628,2.6270092493\H,-4.9411845892,-0.14523  
48551,-2.8756530216\C,0.5725797325,-3.4881150735,-0.3810942668\C,1.552  
7953186,-2.9690069033,-1.3671726604\H,-0.4493567046,-3.1086282964,-0.3  
464593857\H,0.8086736516,-4.4029779743,0.1678133412\H,1.1526437422,-2.  
2099335161,-2.0478455985\H,2.1770694541,-3.7190190192,-1.8687264702\C,  
2.2009811679,-2.4540254461,-0.1141070334\H,1.1998152454,3.9665408049,-  
3.2830017987\C,0.2860253198,5.031930627,2.2282046599\H,0.7362599531,5.  
7816935644,2.9019368221\H,0.4315975272,5.365946155,1.1907886484\H,-0.7  
967450727,5.0006730118,2.4239474021\C,3.295300107,3.3093176785,-1.5091  
98949\C,2.9637092347,3.0348107389,-0.1693497946\C,3.6248209058,4.63335  
55861,-1.8598084772\C,2.9035512094,4.0459365147,0.8084158256\H,2.73919  
36025,2.0056193532,0.1213210754\C,3.6023092225,5.6496982969,-0.8937983  
759\H,3.9104286891,4.8669661453,-2.8905792867\C,3.2365547663,5.3612275  
123,0.4289515985\H,3.8733671684,6.6723886669,-1.173108705\H,3.21986135  
82,6.161000013,1.1763668063\\Version=EM64L-G09RevA.01\State=3-A\HF=-27  
38.7036001\S2=2.006275\S2-1=0.\S2A=2.000022\RMSD=2.401e-09\RMSF=1.934e  
-06\Dipole=0.8441242,-1.7906101,0.0138754\Quadrupole=-8.5676534,0.1241  
671,8.4434863,-2.9716358,-5.0224389,3.8676341\PG=C01 [X(C48H53N1O8Rh2)

### **<sup>3</sup>TS7**

1\1\GINC-A717\FTS\UBPW91\GenECP\C48H53N1O8Rh2(3)\SIOC001\07-Jun-2016\0  
\#p opt=(calcf,ts,noeigen) genecp bpw91\\Title Card Required\\0,3\Rh  
,1.9229644141,-1.2254420645,-0.3780378284\Rh,0.0153085158,0.140466466,  
0.1412490123\O,0.9267469724,-2.3592470356,-1.7294343478\C,-0.293773816  
5,-2.1042792616,-2.0756113941\O,-0.981478834,-1.1365552527,-1.63534435  
5\O,2.4305742543,0.1022306781,-1.8686625764\C,1.7288234469,1.168480922  
, -2.0313459405\O,0.6798726338,1.4752953992,-1.3634473263\O,3.143761390  
5,-0.2677014401,0.9412544029\C,2.7115785332,0.7166966266,1.6686336076\  
O,1.5268063016,1.1532976401,1.6501838848\O,1.3771810403,-2.5261030348,  
1.10057364\C,0.2924842033,-2.30932453,1.7553231967\O,-0.4836630647,-1.  
3004558564,1.5969529577\C,-2.1360306255,1.7476001657,1.8381856316\C,-3

.361462207,2.4875442493,1.7470987913\C,-1.4741543536,1.5987149251,3.0747873163\C,-3.7783969426,2.4117415225,0.3686105646\C,-3.9565593652,3.0316666457,2.9078244928\C,-2.0662169871,2.171867148,4.1996564324\H,-0.5249348722,1.0652383958,3.1257443336\C,-3.2990454518,2.8726278112,4.1252028941\H,-4.9119981192,3.5593648213,2.8506689026\H,-1.5699868829,2.0756591386,5.1698113651\H,-3.7342687462,3.2917860188,5.0362976014\N,-1.7470296464,1.2619446141,0.5947341249\C,-5.1485827133,2.66820406,-0.1325451368\C,-5.7775984351,3.913256457,0.094862053\C,-5.8597684087,1.6634013449,-0.8246976111\C,-7.0832638578,4.1443982601,-0.3563030807\H,-5.2301025762,4.7048319456,0.6145864243\C,-7.1658161002,1.8992302263,-1.2754765241\H,-5.3919529765,0.6879648097,-0.9833436034\C,-7.7810632166,3.1386031572,-1.0435543888\H,-7.5551606338,5.114079667,-0.1747171533\H,-7.7059051412,1.1084726397,-1.8034812662\H,-8.8002736381,3.3202345983,-1.3953179062\C,-0.9320584476,-3.0671082334,-3.1096002482\C,-0.1087789027,-3.33836107,2.8358402128\C,0.0417406233,-4.1845390688,-3.5251307793\H,-0.4406296697,-4.8410927643,-4.2703861736\H,0.9538291182,-3.7648823036,-3.976374657\C,-1.5533755926,-3.8710544868,2.5254926352\H,-1.8277720684,-4.5446868335,3.3572189001\H,-2.2426048603,-3.0111721121,2.5635910109\C,-0.1518372509,-2.6033717242,4.1996013741\H,-0.8695411325,-1.7693130581,4.1803122234\H,-0.4529112697,-3.3067258786,4.9944875438\H,0.8411020408,-2.2021992813,4.4624997892\C,-1.3280588317,-2.2299335586,-4.351065848\H,-1.8245243365,-2.8728115612,-5.0979910058\H,-2.0169656056,-1.4161109682,-4.0767774256\H,-0.4381877267,-1.7851390146,-4.8266988847\C,-2.2442027605,-3.6663967464,-2.4895400266\H,-2.9241352792,-2.8245058374,-2.2767876304\H,-2.7201933109,-4.2798052895,-3.275727518\C,2.190201056,2.1277911755,-3.1550170861\C,3.7579527495,1.3479327874,2.6235141657\C,3.725769316,2.4209837093,-3.0118299383\H,4.0005471051,3.0853017563,-3.851005321\C,5.0370938426,1.7672983004,1.8161886172\H,5.7391757194,2.2172225332,2.5412298334\H,5.5106622956,0.8477492458,1.4347345998\C,4.8010710824,2.722629936,0.6614834618\C,4.9054584133,4.120198407,0.8062588632\C,4.4554192982,2.2086210753,-0.6017027928\C,4.6514958768,4.9675712086,-0.282548343\H,5.1999748279,4.5461388804,1.7708122959\C,4.1595512914,3.0411698372,-1.6966101425\H,4.4003352938,1.1261516824,-0.7314429744\C,4.2724129645,4.435035713,-1.5239260347\H,4.7525302893,6.0507498171,-0.1636629448\H,4.0772248383,5.1054711199,-2.3673474135\C,1.964575053,1.4014920108,-4.5065286163\H,0.8955847478,1.1818531419,-4.6648025707\H,2.3051683072,2.0418127994,-5.337963377\H,2.5215812377,0.4528050111,-4.5439060565\C,1.3821834597,3.4383692253,-3.1283463076\H,1.7217659597,4.0984255938,-3.9449907001\H,0.3079310175,3.2463586755,-3.2713785549\H,1.5112799436,3.9722186483,-2.1754304817\C,4.1730656538,0.2675889955,3.6542513531\H,4.9363709333,0.6742886032,4.3395997781\H,3.309031327,-0.0496649534,4.2617090084\H,4.5878230315,-0.6206204138,3.1538666487\C,3.1525790429,2.5597193319,3.35545328\H,2.2683105143,2.2655015106,3.9405401919\H,3.8983860333,2.9864648944,4.0483417613\H,2.8412050903,3.344275006,2.6504212278\H,4.2643947309,1.4711960404,-3.1619657267\C,-2.5

68000806,3.2121850008,-1.1430457468\C,-2.5150359958,1.8366687713,-1.74  
11091726\H,-1.6419163207,3.6393132528,-0.7527657678\H,-3.3588564537,3.  
9063070126,-1.4359759527\H,-1.5407164923,1.4811011851,-2.0870581503\H,  
-3.3475658534,1.5847326724,-2.4061812484\C,-2.7306676754,1.6054912167,  
-0.2812077064\H,0.3431906305,-4.7988048835,-2.6648084821\C,0.904717405  
8,-4.495922496,2.8987764293\H,0.6004383327,-5.2097471901,3.6836358145\  
H,0.9641873274,-5.0348691566,1.9424993208\H,1.9126770538,-4.1263163215  
,3.1413085909\C,-2.0577241842,-4.4985618835,-1.2343670103\C,-1.9458182  
566,-3.8690707241,0.0202601851\C,-1.9824565536,-5.9043067927,-1.286154  
3962\C,-1.7196502384,-4.5974773255,1.2036135531\H,-2.0282538224,-2.780  
4489853,0.074443951\C,-1.7863354888,-6.6501622332,-0.1149853436\H,-2.0  
867429791,-6.4163771954,-2.2482209762\C,-1.64898777,-6.0022257626,1.12  
08690946\H,-1.7428688929,-7.7424131956,-0.1653828269\H,-1.4952291416,-  
6.5906673594,2.0311784537\\Version=ES64L-G09RevD.01\State=3-A\HF=-2738  
.7209985\S2=2.005547\S2-1=0.\S2A=2.000016\RMSD=3.244e-09\RMSF=3.248e-0  
6\Dipole=-2.465609,1.8185744,-0.2426636\Quadrupole=0.9014015,-2.810167  
9,1.9087664,-11.1716638,8.1734685,-2.8023277\PG=C01 [X(C48H53N1O8Rh2)]  
\\@

## P1

1\1\GINC-A760\SP\RBPW91\GenECP\C48H53N1O8Rh2\SIOC001\21-Jun-2016\0\#\#p  
genecp bpw91 geom=check scrf=(iefpcm,smd,solvent=chlorobenzene)\Titl  
e Card Required\0,1\Rh,0,-1.4515210151,1.910344895,-0.3765384573\Rh,0  
, -0.3359108275,-0.1825296879,0.0599507945\O,0,-0.0193123262,2.34019146  
55,-1.7720459505\C,0,0.9128584404,1.4864266622,-1.988631937\O,0,1.0405  
122416,0.3486325174,-1.3978300658\O,0,-2.5588507661,0.9797356596,-1.84  
08002115\C,0,-2.3689425828,-0.272085814,-2.052092746\O,0,-1.5281690266  
, -1.0158314459,-1.4242890641\O,0,-2.8434660211,1.4031054788,1.05694259  
09\C,0,-2.7334769381,0.2743228754,1.6593887608\O,0,-1.8022617551,-0.59  
09563852,1.4633757414\O,0,-0.3060887678,2.7837915969,1.0700233645\C,0,  
0.5558218268,2.0676234514,1.6950807064\O,0,0.7648129329,0.8110598612,1  
.5041414784\C,0,1.3403643635,-2.2632387619,1.8271618358\C,0,2.73862206  
75,-2.4343274844,1.5999730465\C,0,0.8043593645,-2.041134592,3.09566011  
39\C,0,2.9440152879,-2.7480659049,0.1760280081\C,0,3.6191754747,-2.321  
8722422,2.6933077943\C,0,1.6965528111,-2.0048666837,4.1792705507\H,0,-  
0.2685539684,-1.8940764873,3.2267519314\C,0,3.0862045292,-2.1258253781  
,3.9754512186\H,0,4.6997478679,-2.3967069367,2.5499421893\H,0,1.308161  
491,-1.8679194834,5.1922552337\H,0,3.7623786433,-2.0639241061,4.832962  
5818\N,0,0.6883614173,-2.2868667308,0.556785847\C,0,4.1666108478,-3.21  
89798834,-0.4908594651\C,0,5.119003908,-4.0209042485,0.1814677873\C,0,  
4.3944711898,-2.9137927744,-1.8536004452\C,0,6.2558469009,-4.494559855  
7,-0.4853773069\H,0,4.9476632156,-4.2997910491,1.2239930855\C,0,5.5280  
637171,-3.3946989126,-2.5194880324\H,0,3.678340702,-2.2749326599,-2.37  
78081395\C,0,6.4672993453,-4.18433255,-1.8377160749\H,0,6.9766311586,-  
5.1168887663,0.0531995442\H,0,5.6851271311,-3.141750948,-3.5722079032\

H,0,7.35769225,-4.5524857943,-2.3550493578\C,0,1.9648190042,1.83376825  
51,-3.0668581971\C,0,1.4009035264,2.758641445,2.789008959\C,0,1.712941  
6125,3.2397794699,-3.6441445593\H,0,2.4657158865,3.456536658,-4.421387  
7682\H,0,0.7147395896,3.3076981479,-4.1024918115\C,0,2.9268850621,2.51  
0333714,2.5120579633\H,0,3.4812752501,3.0032412478,3.3307650626\H,0,3.  
113558549,1.4275989754,2.598294257\C,0,1.0460479286,2.0998123476,4.146  
3573115\H,0,1.2419806969,1.0174091111,4.1251356637\H,0,1.6523934777,2.  
5521996186,4.9495224472\H,0,-0.0162049962,2.2600240507,4.3953582193\C,  
0,1.8510121542,0.7803473917,-4.1980201819\H,0,2.6094777952,0.980262856  
3,-4.9738097159\H,0,2.006407133,-0.2381575379,-3.8110561423\H,0,0.8591  
096957,0.8219927252,-4.6777567626\C,0,3.4054137406,1.7341438571,-2.448  
8769297\H,0,3.5802623579,0.6836322215,-2.1641680998\H,0,4.1154109833,1  
.9733087957,-3.2609208065\C,0,-3.2163828282,-0.9186470749,-3.172890604  
4\C,0,-3.8086012638,-0.0468484229,2.7241333048\C,0,-4.7402842723,-0.66  
60037074,-2.8852749651\H,0,-5.3021744407,-1.1383298602,-3.7108210839\C  
,0,-5.2355558126,0.0718130475,2.0774702316\H,0,-5.965235353,-0.1546367  
478,2.8755137133\H,0,-5.3871127552,1.1249138313,1.7891139697\C,0,-5.48  
3004704,-0.8194632611,0.8756791016\C,0,-6.0592699344,-2.0997161583,0.9  
937880427\C,0,-5.1116040535,-0.3713840775,-0.405054947\C,0,-6.23819866  
65,-2.9048343522,-0.1410974575\H,0,-6.3822424957,-2.4617943058,1.97513  
61622\C,0,-5.2435756081,-1.1788608933,-1.549643546\H,0,-4.694810509,0.  
6324395425,-0.5125159387\C,0,-5.8246350156,-2.4541230478,-1.4036989092  
\H,0,-6.7046464537,-3.8896383871,-0.0411221992\H,0,-5.9664502459,-3.09  
08099068,-2.2829754419\C,0,-2.8567653843,-0.2109421633,-4.5044953992\H  
,0,-1.7977147608,-0.3727801303,-4.7648678055\H,0,-3.4724492335,-0.6198  
160857,-5.3235300682\H,0,-3.0350154374,0.8729050385,-4.4383401498\C,0,  
-2.9293708173,-2.4261373914,-3.2940609246\H,0,-3.5383758087,-2.8529841  
237,-4.10917939\H,0,-1.870282285,-2.6112145691,-3.5299311997\H,0,-3.17  
24439246,-2.9622557567,-2.3651634882\C,0,-3.6984042084,1.0221309835,3.  
8416007177\H,0,-4.4766100136,0.8487625895,4.6041320699\H,0,-2.71740054  
78,0.9705982024,4.3422398121\H,0,-3.8254337916,2.0362552381,3.43392457  
58\C,0,-3.6006735831,-1.448498675,3.3262975599\H,0,-2.6231750665,-1.52  
47660106,3.826269258\H,0,-4.3822732396,-1.6441498011,4.080142416\H,0,-  
3.6538530886,-2.2351550612,2.5599333615\H,0,-4.9187047697,0.4198488051  
, -2.9508672521\C,0,-0.19520378,-3.3857154085,-0.0481100884\C,0,0.73761  
62108,-3.3927285798,-1.2991895116\H,0,-1.2370323672,-3.072325689,-0.17  
54773199\H,0,-0.1119854299,-4.3060277743,0.549198778\H,0,0.3295245756,  
-2.8088327317,-2.1362238438\H,0,1.0874098343,-4.3737968488,-1.65021800  
98\C,0,1.6976471014,-2.6486731057,-0.3956271647\H,0,1.7803674747,4.015  
5922775,-2.8682016122\C,0,1.0909967283,4.2664401263,2.8467301622\H,0,1  
.6919971564,4.7334136876,3.6458935605\H,0,1.3266687515,4.7664456875,1.  
8963406952\H,0,0.027595707,4.4446307763,3.0671978286\C,0,3.6623000759,  
2.6293905473,-1.252012369\C,0,3.2950074033,2.1899485043,0.0329786956\C  
,0,4.2404138478,3.9072881025,-1.3821424744\C,0,3.4307786244,3.00678832  
6,1.1704354605\H,0,2.8787935778,1.1869478953,0.1501218105\C,0,4.424919

4678, 4.7203075606, -0.2540314116\H, 0, 4.5569052588, 4.2625169466, -2.36815  
62201\C, 0, 4.013582348, 4.2796958406, 1.0125623611\H, 0, 4.8899370077, 5.704  
7994297, -0.3631478358\H, 0, 4.1542682205, 4.9244478749, 1.8860830262\Version=ES64L-G09RevD.01\State=1-A\HF=-2739.5101651\RMSD=4.793e-09\Dipole=  
0.0287065, -1.6886904, -0.0993367\Quadrupole=-9.4155792, -6.6891518, 16.10  
47309, 4.3089113, -4.4718553, 5.1563581\PG=C01 [X(C48H53N1O8Rh2)]\@

## P2

1\1\GINC-A743\FOpt\RBPW91\GenECP\C48H53N1O8Rh2\SIOC001\12-Apr-2016\0\  
#p opt genecp bpw91\Title Card Required\0, 1\Rh, 0.080753014, 0.0104158  
03, 0.0926255324\Rh, -0.1616147605, 0.0963788499, 2.4979494252\O, 2.1145085  
999, 0.0547483898, 0.3428949811\C, 2.5990651508, 0.0909513556, 1.5269771856  
\O, 1.9138283913, 0.1024036134, 2.6197279825\O, 0.1346597519, -2.0451028941  
, 0.2221642982\C, 0.0105234811, -2.5993720112, 1.3735525536\O, -0.126663738  
6, -1.9824157633, 2.4934280536\O, -1.9722405398, -0.010658506, -0.067014294  
8\C, -2.674940412, 0.0007675884, 1.0083754855\O, -2.2129164586, 0.047375349  
6, 2.20669028\O, 0.0484263086, 2.0588840224, 0.0512050585\C, -0.0822429964,  
2.6991571591, 1.1521894755\O, -0.208865681, 2.1681225268, 2.3204131239\C, -  
1.2026567796, 1.004222904, 5.4308287724\C, -1.0014058532, 0.7726823002, 6.8  
190489787\C, -2.2494870281, 1.8093932495, 4.9669239972\C, 0.266334668, -0.0  
351412461, 6.9482936136\C, -1.8280159581, 1.3915492306, 7.7603188388\C, -3.  
0952027733, 2.3926443797, 5.9236959566\H, -2.3888950719, 1.9641848749, 3.89  
76855864\C, -2.8906481773, 2.1890548854, 7.3013167761\H, -1.6564884421, 1.2  
545509119, 8.831582371\H, -3.9252258478, 3.0226362666, 5.5914150375\H, -3.5  
651801485, 2.657497239, 8.0234090457\N, -0.2425344425, 0.2925400114, 4.6449  
992648\C, 1.2825422073, 0.5222291411, 7.9325268712\C, 1.2873792427, 0.10081  
09819, 9.2764014203\C, 2.2029271328, 1.5090722755, 7.527751796\C, 2.1952616  
552, 0.6499372391, 10.1941652739\H, 0.5763994349, -0.6616016911, 9.61010537  
66\C, 3.1146918817, 2.0531318173, 8.4430688371\H, 2.202159571, 1.8500771561  
, 6.4883037607\C, 3.1138431327, 1.6255355927, 9.7794074169\H, 2.1854518016,  
0.3116685858, 11.2343401254\H, 3.8270471602, 2.8131818673, 8.1095365822\H,  
3.8252594038, 2.0497657188, 10.4934428675\C, 4.1393632723, 0.1018808822, 1.  
6696620423\C, -0.1158811964, 4.2438973192, 1.0853149766\C, 4.8141230196, 0.  
136778642, 0.2852086342\H, 5.9105812143, 0.1279746178, 0.4107492133\H, 4.52  
8894324, -0.7390118159, -0.3169198417\C, 0.9805055028, 4.838718905, 2.03929  
97029\H, 0.9029147079, 5.9382183266, 1.9648324944\H, 0.7122836591, 4.564818  
6095, 3.0732622558\C, -1.5011928802, 4.7140731275, 1.5973016797\H, -1.67846  
74796, 4.3783765923, 2.6302419582\H, -1.5542923599, 5.8158268815, 1.5748790  
69\H, -2.3111492285, 4.3248898131, 0.958517104\C, 4.558917229, -1.187455350  
6, 2.4196480202\H, 5.6536847576, -1.2033285553, 2.5552287966\H, 4.083381307  
9, -1.244867862, 3.4103956496\H, 4.2771289447, -2.0858117859, 1.8460261499\  
C, 4.5809352971, 1.3358046084, 2.5346322723\H, 4.1720467032, 1.2002941614, 3  
.5496896874\H, 5.681412243, 1.286999013, 2.6194219013\C, 0.0568327488, -4.1  
463974857, 1.4037274129\C, -4.2129950712, -0.0167958733, 0.8361511497\C, -1  
.0194876405, -4.7228207576, 0.4154703194\H, -0.9332885686, -5.8234020375, 0

.4593230246\C,-4.6277439692,-1.234780827,-0.0644063226\H,-5.72616263,-1.188801825,-0.1736372955\H,-4.1950048364,-1.0773143996,-1.0660519041\C,-4.2133534975,-2.5978779548,0.4554834021\C,-5.0705641381,-3.3977598574,1.236495458\C,-2.9235157126,-3.0825958692,0.1722432184\C,-4.6312538792,-4.634972037,1.7307783532\H,-6.0887196555,-3.0563316037,1.4491989376\C,-2.4496596854,-4.3010742732,0.6912922236\H,-2.2639353115,-2.4860822436,-0.4614969682\C,-3.3269634611,-5.0809792405,1.4703624912\H,-5.310241584,-5.2560611418,2.3230416156\H,-2.9926848866,-6.0461866831,1.8646555796\C,1.4548687117,-4.584580956,0.8967758817\H,2.2510800157,-4.2173845614,1.5653587116\H,1.5166613473,-5.6858833583,0.8713531739\H,1.6478380269,-4.19878441,-0.1155682131\C,-0.1712434878,-4.6863128189,2.8273512983\H,-0.1361329561,-5.7891836245,2.8131230043\H,0.6119002664,-4.3333821089,3.5158057697\H,-1.1454051234,-4.3744540385,3.2308375901\C,-4.6165283379,1.2851744838,0.0977185086\H,-5.7064279076,1.2968081939,-0.0732344999\H,-4.3601361299,2.1741764482,0.6975870693\H,-4.107491665,1.3650101413,-0.8747021872\C,-4.9256298026,-0.0830754856,2.1997773556\H,-4.6732492142,0.7864124013,2.8247438868\H,-6.0181359477,-0.0873929535,2.0432279133\H,-4.6505926786,-0.9886191857,2.7594568864\H,-0.737068186,-4.4158673075,-0.6049249068\C,0.3158435869,-1.6444951284,6.846108788\C,1.2461927483,-1.5678576945,5.5824265284\H,-0.6702751798,-2.0621078778,6.6037486625\H,0.7467432142,-2.1253539164,7.7362464648\H,1.0475152425,-2.2408353782,4.7414131952\H,2.310038643,-1.5717459473,5.8622039471\C,0.6401047964,-0.1965261509,5.4843881198\H,4.5350225334,1.037666988,-0.2797575741\C,0.093606657,4.7301540465,-0.3613712123\H,0.0459951107,5.8323590531,-0.3889781087\H,1.0677841253,4.4129070375,-0.7604180151\H,-0.686863,4.3345865692,-1.0288434228\C,4.1618231713,2.6912172279,1.9976856184\C,2.8765874699,3.1858705068,2.2861433854\C,5.0144345423,3.4743665528,1.1951656497\C,2.4037133942,4.3993857456,1.753913229\H,2.2183139356,2.6005969906,2.9323222101\C,4.5755589199,4.7051543523,0.685153818\H,6.028040614,3.1236046157,0.9759919929\C,3.2766692308,5.1617916553,0.9531301682\H,5.2499826574,5.3120904803,0.0734882601\H,2.9419199746,6.1211140498,0.5453877568\\Version=ES64L-G09RevD.01\State=1-A\HF=-2738.7800936\RMSD=2.406e-09\RMSF=8.994e-06\Dipole=0.1572322,-0.1492848,2.1936327\Quadrupole=1.8638266,-0.3392755,-1.5245511,-5.7374528,2.5640935,-5.4207868\PG=C01 [X(C48H53N1O8Rh2)]\@

## 2a

1\1\GINC-A721\SP\RBPW91\6-311++G(d,p)\C16H13N1\ROOT\22-Mar-2016\0\#\p  
bpw91/6-311++G(d,p) geom=check scrf=(iefpcm,smd,solvent=toluene)\Titl  
e Card Required\0,1\C,0,-0.0013058269,-0.0339638292,-0.0024136642\C,0  
,0.0033660694,-0.0383077592,1.4418157982\C,0,1.1750342127,-0.011014794  
4,-0.7659342292\C,0,-1.3789077296,-0.0458227458,1.9277519058\C,0,1.255  
0981662,-0.0763588161,2.0940278393\C,0,2.3921067947,0.0016020031,-0.07  
76276468\H,0,1.139297599,-0.0051036692,-1.8585560585\C,0,2.4289350899,  
-0.0436277936,1.3352038423\H,0,1.3074044324,-0.1351737707,3.1840716123

\H,0,3.3283796322,0.0336235982,-0.6416980879\H,0,3.3967127543,-0.06063  
85281,1.8444772502\N,0,-1.3352909801,-0.1364709253,-0.3581828679\C,0,-  
1.8712997693,0.0246626819,3.3099695054\C,0,-1.1991875158,0.7777734997,  
4.3015103859\C,0,-3.0642702657,-0.6402821038,3.681208462\C,0,-1.696954  
6118,0.8549461409,5.6083258318\H,0,-0.2965566666,1.3320697869,4.032579  
9257\C,0,-3.5662347201,-0.5527016882,4.9846507972\H,0,-3.5853406432,-1  
.2489590885,2.9362111265\C,0,-2.8828023616,0.1918719987,5.9585218264\H  
,0,-1.1594824354,1.447093701,6.3552567543\H,0,-4.4894217859,-1.0794546  
635,5.2449265054\H,0,-3.2699672172,0.2538138495,6.9795034761\C,0,-2.42  
52738257,0.2668851012,-1.2808479704\C,0,-3.3986700066,0.1595903626,-0.  
0451238226\H,0,-2.5912395781,-0.4372222207,-2.1112400188\H,0,-2.305054  
6342,1.2899439865,-1.6722367544\H,0,-4.1242835828,-0.666878204,-0.1044  
56094\H,0,-3.9317098722,1.0894301964,0.2052475128\C,0,-2.1356037524,-0  
.10721855,0.7654133606\\Version=ES64L-G09RevD.01\State=1-A\HF=-672.347  
7786\RMSD=4.918e-09\Dipole=-0.9553521,0.2714996,-1.0783375\Quadrupole=  
1.1698142,-8.2226733,7.0528591,2.1992474,4.3176177,0.0687901\PG=C01 [X  
(C16H13N1)]\@

## 2a'

1\1\GINC-A763\SP\RBPW91\6-311++G(d,p)\C16H13N1\SIOC001\24-Mar-2016\0\\  
#p bpw91/6-311++G(d,p) geom=check scrf=(iefpcm,smd,solvent=toluene)\T  
itle Card Required\\0,1\C,0,-0.0101358724,-0.0119013125,-0.0006286397\  
C,0,0.0098486572,-0.0232712752,1.4263836879\C,0,1.1823208527,0.0293358  
87,-0.7374942336\C,0,-1.4266039157,-0.1611527667,1.8673260875\C,0,1.22  
45858462,-0.0460755454,2.1152736046\C,0,2.3952416923,0.0425964006,-0.0  
322854203\H,0,1.1540730873,0.0501810426,-1.8296655621\C,0,2.4192747371  
,0.0056094639,1.3748666319\H,0,1.25097128,-0.093414331,3.2078909817\H,  
0,3.3386920107,0.0782522871,-0.5848641401\H,0,3.3790551303,0.019873773  
9,1.899043794\N,0,-1.3280097471,0.0250601901,-0.5279580639\C,0,-1.6850  
716887,-1.2435122866,2.8989916835\C,0,-1.6299169971,-0.9516000982,4.27  
61302895\C,0,-1.9394746231,-2.5703848783,2.5003246682\C,0,-1.826730454  
2,-1.9594442606,5.2311220029\H,0,-1.4285339482,0.0727558207,4.60554367  
13\C,0,-2.1431777747,-3.577290646,3.4539944725\H,0,-1.9779641441,-2.80  
98970652,1.4336871589\C,0,-2.0874120105,-3.2755892472,4.822769688\H,0,  
-1.778314231,-1.7140311992,6.2961022328\H,0,-2.3464585084,-4.600635648  
,3.1252695194\H,0,-2.2464462468,-4.0611446722,5.5668605459\C,0,-3.3754  
661582,0.5233395157,0.8990477979\C,0,-2.4322441345,1.0907160332,2.0191  
643552\H,0,-4.1563074591,-0.1285946052,1.3191852615\H,0,-3.7996325225,  
1.2267309174,0.1702354391\H,0,-2.8719344767,1.1754855682,3.0236310495\  
H,0,-1.9541222946,2.0310874058,1.7145067176\C,0,-2.1090922078,-0.18638  
92463,0.4933209677\\Version=ES64L-G09RevD.01\State=1-A\HF=-672.3291797  
\RMSD=4.195e-09\Dipole=-0.3368496,0.1118352,1.2576596\Quadrupole=2.285  
3192,0.4771962,-2.7625154,-0.0543251,-1.98253,1.2298625\PG=C01 [X(C16H  
13N1)]\@

**The total energies, enthalpies and free energies of the lowest conformers of all species shown in Scheme 5 and archive entries**

Table S3<sup>a</sup>

|              | $E_{\text{tot}} (E_h)$ | $H_{298,\text{toluene}}$ | $G_{298,\text{toluene}}$ | # of imaginary frequencies       |
|--------------|------------------------|--------------------------|--------------------------|----------------------------------|
| <b>IN3-1</b> | -672.3301891           | -672.0783376             | -672.1329126             | 0                                |
| <b>TS3-1</b> | -672.2781201           | -672.0279747             | -672.0811297             | 1<br>(-467.34 cm <sup>-1</sup> ) |
| <b>TS4-1</b> | -672.3090265           | -672.0587802             | -672.1116532             | 1<br>(-362.69 cm <sup>-1</sup> ) |

a. SMD/BPW91/6-311++G(d,p)//BPW91/6-31G(d)

**IN3-1**

```
1\1\GINC-SHI_02\SP\RBPW91\6-311++G(d,p)\C16H13N1\YIN\26-May-2016\0\#p
bpw91/6-311++g(d,p) geom=check scrf=(iefpcm,smd,solvent=toluene)\Title
Card Required\0,1\C,0,-0.016712397,0.070484693,0.0251448067\C,0,0.
0090916909,0.0204589317,1.4976192254\C,0,1.2232937214,0.0611048392,-0.
7030876564\C,0,-1.3215931617,0.0251224823,1.9129415606\C,0,1.261154054
7,-0.0519970952,2.190925319\C,0,2.4000265726,0.0004376735,0.0068350125
\H,0,1.205260348,0.099129616,-1.7950952423\C,0,2.4218618974,-0.0598730
046,1.4496926481\H,0,1.2875250926,-0.1097630499,3.2827714258\H,0,3.355
0976105,-0.0090917077,-0.5271537709\H,0,3.3900457747,-0.1188602281,1.9
552719873\N,0,-1.2433615805,0.1248563794,-0.4841452871\C,0,-1.82929928
02,0.0433766853,3.2946286339\C,0,-1.352490394,1.0120586522,4.211363685
4\C,0,-2.7801664744,-0.8969696846,3.7577102768\C,0,-1.8161684962,1.044
1546815,5.5322678358\H,0,-0.6277054332,1.7544297927,3.8663929548\C,0,-
3.2423723193,-0.8627392537,5.079392286\H,0,-3.1217100337,-1.6903956103
,3.0883711719\C,0,-2.7660157946,0.1094470624,5.9716577446\H,0,-1.43793
46544,1.8065942479,6.2195699121\H,0,-3.9695842274,-1.6071487966,5.4166
205336\H,0,-3.1289120742,0.1355168582,7.0029361299\C,0,-3.3523979791,1
.0442243285,0.551953119\C,0,-3.538671147,-0.4144129344,0.4170355311\H,
0,-3.3616621375,1.6699121449,-0.3414491405\H,0,-3.6427569742,1.5277480
057,1.4874230327\H,0,-3.6798130071,-0.8356528013,-0.5797035984\H,0,-4.
0070641687,-0.9612972287,1.2357864348\C,0,-2.098782453,0.109276529,0.6
519831786\Version=EM64L-G09RevA.01\State=1-A\HF=-672.3301891\RMSD=4.4
98e-09\Dipole=-0.5329801,0.0736814,1.1359568\Quadrupole=5.873895,-3.45
13747,-2.4225203,2.4980824,-1.3713793,0.7865474\PG=C01 [X(C16H13N1)]\
```

**TS3-1**

```
1\1\GINC-SHI_02\SP\RBPW91\6-311++G(d,p)\C16H13N1\YIN\10-Oct-2016\0\#p
bpw91/6-311++g(d,p) scrf=(iefpcm,smd,solvent=toluene)\Title Card Req
uired\0,1\C,0,2.2303212321,0.3532291551,-0.1205897452\C,0,1.103408939
8,-0.5582080467,-0.1232829964\C,0,3.5655341603,-0.1272659199,-0.087835
9258\C,0,-0.0809121799,0.245588571,-0.163242337\C,0,1.3491179562,-1.95
```



68113353,-0.1409703784\C,0,3.7694050774,-1.4991155307,-0.0745618459\H,  
0,4.3987369324,0.5806353471,-0.0859812758\C,0,2.6652484988,-2.40304599  
67,-0.106050816\H,0,0.5217048974,-2.6701855644,-0.1815896683\H,0,4.786  
2027101,-1.9008880082,-0.050740375\H,0,2.8654508361,-3.4789183078,-0.1  
08672694\N,0,1.8332377754,1.6541263631,-0.2281259296\C,0,-1.4887151665  
, -0.1742487866,-0.1174283605\C,0,-1.9090561984,-1.2322444007,0.7246349  
464\C,0,-2.4736778553,0.4746732461,-0.9014583502\C,0,-3.2525360866,-1.  
6228382867,0.7783878879\H,0,-1.1723078593,-1.7326185334,1.358937559\C,  
0,-3.8188989897,0.0910827707,-0.8365236958\H,0,-2.1672666397,1.2657401  
145,-1.592242722\C,0,-4.2166320145,-0.9613453202,0.0021450771\H,0,-3.5  
500399755,-2.4424600073,1.4395368289\H,0,-4.5580254138,0.6066617947,-1  
.4572439864\H,0,-5.2660773732,-1.2657302786,0.0470293722\C,0,0.7238229  
119,2.7264523467,1.1812772636\C,0,-0.2318237777,2.8944384082,0.0597579  
807\H,0,1.5977515385,3.3663309345,1.2944766127\H,0,0.4171632644,2.1377  
312938,2.0483111318\H,0,-0.0142561339,3.7181570318,-0.6300778067\H,0,-  
1.295776657,2.804397981,0.3052878922\C,0,0.4075005899,1.5716039648,-0.  
2584546432\\Version=EM64L-G09RevA.01\State=1-A\HF=-672.2781201\RMSD=6.  
787e-09\Dipole=-0.6428779,0.7930025,0.7892607\Quadrupole=-0.9739282,5.  
9562373,-4.9823091,-1.8894617,2.4332436,0.4213865\PG=C01 [X(C16H13N1)]

#### TS4-1

1\1\GINC-SHI\_02\SP\RBPW91\6-311++G(d,p)\C16H13N1\YIN\26-May-2016\0\#\#p  
bpw91/6-311++g(d,p) geom=check scrf=(iefpcm,smd,solvent=toluene)\Tit  
le Card Required\0,1\C,0,0.0072520743,-0.0908186616,0.0034163208\C,0,  
0.0215378696,0.0757566679,1.4393940515\C,0,1.2314784651,-0.1896661545,  
-0.7044221851\C,0,-1.3555535435,0.1897018197,1.8241169032\C,0,1.246154  
2804,0.1868423396,2.1414771749\C,0,2.4201453735,-0.1054207761,0.012605  
3583\H,0,1.2227804555,-0.326594278,-1.7887120448\C,0,2.4329736426,0.08  
89232717,1.423083408\H,0,1.260243841,0.3564253542,3.2219281959\H,0,3.3  
743071507,-0.1825271577,-0.5178562307\H,0,3.3916517349,0.1660822027,1.  
9435229648\N,0,-1.2603027874,-0.1468055274,-0.5251776131\C,0,-1.868651  
6909,0.7123843384,3.1075909563\C,0,-2.7847428121,1.7882589656,3.133392  
1435\C,0,-1.4460460317,0.1596202391,4.3386402705\C,0,-3.259498854,2.29  
53932482,4.3501790107\H,0,-3.0996983325,2.2435527682,2.1904033532\C,0,  
-1.920377679,0.6701887848,5.5533392155\H,0,-0.7528097109,-0.6862429957  
,4.3348198961\C,0,-2.829733617,1.7392651866,5.5642071541\H,0,-3.961953  
6303,3.1338687821,4.3489728012\H,0,-1.5827908877,0.2278429413,6.495090  
7601\H,0,-3.2000506733,2.1367523224,6.5132417506\C,0,-2.0785701318,0.0  
726215925,0.5295749516\C,0,-2.7212799573,-1.4075335898,1.3989708766\C,  
0,-3.4919227903,-0.4280822779,0.5716787953\H,0,-2.2416106452,-2.249981  
1673,0.8976579915\H,0,-2.9312215625,-1.5118336945,2.4656792135\H,0,-4.  
2300189189,0.1704856252,1.1167394639\H,0,-3.8387251241,-0.7699972202,-  
0.4087368785\\Version=EM64L-G09RevA.01\State=1-A\HF=-672.3090265\RMSD=  
3.098e-09\Dipole=-0.9650877,-0.3036361,1.5387959\Quadrupole=5.1432241,  
-1.4679571,-3.675267,-1.4337378,-0.3637758,0.721137\PG=C01 [X(C16H13N1]

The total energies, enthalpies and free energies of the lowest conformers of all species shown in Scheme 6 and archive entries

Table S4<sup>a</sup>

|                         | $E_{\text{tot}} (E_h)$ | $H_{298, \text{PhCl}}$ | $G_{298, \text{PhCl}}$ | # of imaginary frequencies       |
|-------------------------|------------------------|------------------------|------------------------|----------------------------------|
| <b>3a</b>               | -821.1269336           | -820.8348716           | -820.9001976           | 0                                |
| <b><sup>1</sup>IN5</b>  | -2778.759321           | -2777.7753860          | -2777.9280410          | 0                                |
| <b><sup>1</sup>TS8</b>  | -2778.754429           | -2777.7714006          | -2777.9193536          | 1<br>(-102.23 cm <sup>-1</sup> ) |
| <b><sup>1</sup>IN6</b>  | -2778.819204           | -2777.8329374          | -2777.9806464          | 0                                |
| <b><sup>1</sup>TS9</b>  | -2778.760408           | -2777.7781219          | -2777.9271939          | 1<br>(-434.70 cm <sup>-1</sup> ) |
| <b><sup>1</sup>TS10</b> | -2778.802188           | -2777.8172716          | -2777.9632846          | 1<br>(-488.86 cm <sup>-1</sup> ) |
| <b><sup>3</sup>IN5</b>  | -2778.761319           | -2777.7777903          | -2777.9313513          | 0                                |
| <b><sup>3</sup>TS8</b>  | -2778.743625           | -2777.7615381          | -2777.9116171          | 1<br>(-267.80 cm <sup>-1</sup> ) |
| <b><sup>3</sup>IN6</b>  | -2778.782514           | -2777.7980175          | -2777.9464875          | 0                                |
| <b><sup>3</sup>TS11</b> | -2778.755729           | -2777.7734593          | -2777.9221543          | 1<br>(-542.86 cm <sup>-1</sup> ) |
| <b><sup>3</sup>IN7</b>  | -2778.790159           | -2777.8072794          | -2777.9593574          | 0                                |
| <b><sup>3</sup>TS12</b> | -2778.74318            | -2777.7606770          | -2777.9105550          | 1<br>(-589.22 cm <sup>-1</sup> ) |
| <b><sup>3</sup>TS13</b> | -2778.769389           | -2777.7859744          | -2777.9384784          | 1<br>(-467.36 cm <sup>-1</sup> ) |
| <b>P3</b>               | -2778.74318            | -2777.7606770          | -2777.9105550          | 0                                |
| <b>P4</b>               | -2778.862125           | -2777.8749938          | -2778.0229598          | 0                                |
| <b>4a</b>               | -711.6841274           | -711.4016582           | -711.4576382           | 0                                |
| <b>4a'</b>              | -711.714235            | -711.4304371           | -711.4864601           | 0                                |

a. SMD/BPW91/BS2// BPW91/BS1

### 3a

```
1\1\GINC-A736\SP\RBPW91\6-311++G(d,p)\C17H15N3\SIOC001\14-Jun-2016\0\#\#p bpw91/6-311++G(d,p) scrf=(iefpcm,smd,solvent=chlorobenzene) geom=check\Title Card Required\0,1\C,0,1.8936963197,0.0455720195,-0.1503874782\C,0,1.9047862685,0.555573652,1.1536822385\C,0,1.2734812502,-0.1361307436,2.2142659749\C,0,0.6089876594,-1.3469179366,1.9064275596\C,0,0.6006420609,-1.857501222,0.6031841618\C,0,1.2457778936,-1.1661091653,-0.4332694081\H,0,2.3841184585,0.6056224835,-0.9523273833\H,0,2.3821083727,1.5180397468,1.3486291862\H,0,0.102385496,-1.8954910046,2.7044438979\H,0,0.0864348833,-2.800865985,0.3965108881\H,0,1.2357484903,-1.5624690318,-1.4525689567\C,0,1.2926121848,0.3771785168,3.6100423879\C,0,0.1096331697,0.0600767073,4.4782650484\C,0,-1.1344674528,0.6689472803,4.2193380222\C,0,0.1815522074,-0.8549098839,5.5592784918\C,0,-2.2620332546,0.4111699273,5.0085998557\H,0,-1.2033548171,1.3637903592,3.3778410886\C,0,-0.9498336832,-1.1190765939,6.3587052022\C,0,-2.1649382641,-0.485300831,6.0838374747\H,0,-3.2106523927,0.9070500381,4.7868543104\H,0,-0.8744240084,-1.8263805401,7.1897625454\H,0,-3.0362635197,-0.6976700581,6.7094813296\N,0,1.4390500026,-1.4870613821,5.7733093719\N,0,1.5556839414,-2.317656312,6.6882461354\N,0,1.8305602234,-3.1066624918,7.4897070145\C,0,2.3081957441,1.1197898776,4.1177084866\C,0,3.7005345122,1.5075039171,3.6289298019\C,0,2.5853405785,1.6829934955,5.5055545835\H,0,4.2521927924,0.7506546293,3.0465824121\H,0,3.7158111549,2.4535588552,3.0575702655\H,0,2.29457563,1.0711298418,6.3731256082\H,0,2.1592358149,2.6943553978,5.6396981363\C,0,4.0992949347,1.7275014481,5.1222252672\H,0,4.650950398,0.8679833347,5.5312052057\H,0,4.6475015371,2.6516803711,5.3600654335\Version=ES64L-G09RevD.01\State=1-A\HF=-821.1269336\RMSD=5.566e-09\Dipole=-0.3954818,0.8259818,-0.1578986\Quadrupole=3.2357617,-2.1923743,-1.0433873,5.2943544,-4.8840195,2.7098027\PG=C01 [X(C17H15N3)]\@
```

### 1IN5

```
1\1\GINC-A731\SP\RBPW91\GenECP\C49H55N108Rh2\SIOC001\13-Jun-2016\0\#\#p genecp bpw91 scrf=(iefpcm,smd,solvent=chlorobenzene) geom=check scf=(maxcyc=256)\Title Card Required\0,1\Rh,0,-0.0708320087,-0.0135462342,0.0560566041\Rh,0,-0.2321006958,0.0705993584,2.490877987\O,0,1.967530295,-0.0161944465,0.2074203577\C,0,2.4986004789,0.0148915491,1.3741607486\O,0,1.8625310057,0.0452352298,2.4921723387\O,0,-0.0515795128,-2.064900809,0.1704660968\C,0,-0.1324177588,-2.6193968013,1.3231203421\O,0,-0.2318259047,-1.9967311224,2.4458469224\O,0,-2.1392158323,0.0195573743,0.0028700229\C,0,-2.7962353323,0.0539588329,1.1024663606\O,0,-2.2847999103,0.0752759916,2.285182763\O,0,-0.0538256077,2.0246398443,-0.0009738674\C,0,-0.1392575533,2.6759788776,1.0978713619\O,0,-0.2434225741,2.1519262029,2.2707495688\C,0,-0.9036945614,-0.4416640911,5.3354817229\C,0,-0.6533390657,-0.1521288747,6.75096099\C,0,-1.83027159,-1.5053164133,5.0189127122\C,0,0.1349767227,1.0218439072,7.1725684985\C,0,-1.1870
```

654374,-1.0216357039,7.7209728262\C,0,-2.3659268744,-2.3106319746,6.01  
253874\H,0,-2.0546931052,-1.6901568459,3.970198066\C,0,-2.0308179654,-  
2.0806915542,7.3663094567\H,0,-0.9591240817,-0.838489441,8.7745617777\  
H,0,-3.0420778416,-3.1288434051,5.7482280036\H,0,-2.4498428993,-2.7211  
358102,8.1481433601\N,0,-0.146284383,0.201936513,4.4299861915\C,0,1.15  
85269731,0.8113036776,8.2431040913\C,0,2.1794521935,-0.1479789438,8.05  
70309054\C,0,1.1323882926,1.5366360012,9.4542100061\C,0,3.1579846893,-  
0.3531397276,9.038414602\H,0,2.2061576785,-0.7206302599,7.1256342269\C  
,0,2.1088566679,1.3273660492,10.4384090013\H,0,0.3266158038,2.25480253  
06,9.6299732354\C,0,3.1279876717,0.3852879315,10.2320139658\H,0,3.9474  
621412,-1.0916722127,8.8703979493\H,0,2.0685838976,1.8966943044,11.371  
8628007\H,0,3.8906522152,0.223150466,10.9991057833\C,0,4.0422865816,-0  
.0075032675,1.4647828014\C,0,-0.1445957106,4.2199132428,1.021116208\C,  
0,4.6710312295,0.0050211728,0.0586940654\H,0,5.7704833265,-0.029577692  
9,0.1478034765\H,0,4.3458013473,-0.8669288802,-0.5287681063\C,0,0.9963  
447613,4.7976082223,1.9325401452\H,0,0.9360711421,5.8979098766,1.85494  
03388\H,0,0.7604041279,4.532916405,2.9764091368\C,0,-1.5047004565,4.72  
05263067,1.5702710298\H,0,-1.6659233342,4.3883844093,2.6066306687\H,0,  
-1.5331310146,5.8230098889,1.5468176055\H,0,-2.3395878646,4.3493875549  
,0.9532624309\C,0,4.4532397135,-1.3020743619,2.2113035186\H,0,5.550216  
1631,-1.3368725766,2.3230334799\H,0,3.99598107,-1.3463255346,3.2112428  
445\H,0,4.1440178258,-2.1973365412,1.6467695006\C,0,4.5353796263,1.220  
4138678,2.3117377947\H,0,4.1542308003,1.0963757332,3.3386548913\H,0,5.  
6366574974,1.1489550818,2.3611817437\C,0,-0.0911269571,-4.163876902,1.  
3669116392\C,0,-4.3387417581,0.0880889815,1.0003907877\C,0,-1.27714599  
95,-4.7337070902,0.5066558652\H,0,-1.218262364,-5.8344834493,0.5767301  
332\C,0,-4.8298735783,-1.1703706392,0.1967697665\H,0,-5.9322631076,-1.  
1114999313,0.1598225509\H,0,-4.4647810233,-1.0714261857,-0.8387143352\  
C,0,-4.3961593568,-2.5126668622,0.7537894155\C,0,-5.1887883902,-3.2444  
326053,1.6602500984\C,0,-3.1538436768,-3.0509981517,0.3702755383\C,0,-  
4.7326396065,-4.4675123935,2.1746179997\H,0,-6.1726057589,-2.863703479  
2,1.9524853531\C,0,-2.660270157,-4.2555636637,0.9046219622\H,0,-2.5466  
200362,-2.5104509482,-0.3599117732\C,0,-3.4734473632,-4.9669107127,1.8  
091389159\H,0,-5.3651356558,-5.0379496778,2.8617040114\H,0,-3.12706844  
26,-5.9222170781,2.2165155321\C,0,1.2388791411,-4.6206186653,0.7154257  
005\H,0,2.1051600189,-4.2689052765,1.2996089513\H,0,1.278288248,-5.722  
5448931,0.6841344758\H,0,1.3334264592,-4.2360741735,-0.3111436394\C,0,  
-0.1649642391,-4.6843680519,2.8143236234\H,0,-0.089036344,-5.785187539  
9,2.8120454165\H,0,0.6591527922,-4.2833388352,3.4232790965\H,0,-1.1098  
220619,-4.4035512378,3.3006959581\C,0,-4.7328516115,1.3539660806,0.198  
1839683\H,0,-5.8271696704,1.3842080313,0.0621644077\H,0,-4.4347815581,  
2.2695819214,0.7351696025\H,0,-4.2550301571,1.3617813174,-0.7929284448  
\C,0,-4.9887966056,0.1349468827,2.3959066443\H,0,-4.6566509646,1.02080  
50238,2.9581291624\H,0,-6.0859482118,0.1860647619,2.2892296207\H,0,-4.  
7395592691,-0.7541185326,2.9925904906\H,0,-1.0879666552,-4.4646068517,

-0.5455552529\H,0,4.3951063346,0.9095075198,-0.5022114895\C,0,0.027767  
7335,4.6887855419,-0.4366127348\H,0,0.0021114383,5.7914506942,-0.47134  
11487\H,0,0.9819059294,4.3488202356,-0.8640885495\H,0,-0.7823532473,4.  
3054237437,-1.0751311916\C,0,4.1256109504,2.5811905627,1.7819284903\C,  
0,2.8679419371,3.1103001996,2.1268203204\C,0,4.9568273498,3.3344703952  
,0.929628555\C,0,2.3987332914,4.3268207766,1.5978183108\H,0,2.23101239  
74,2.5508803112,2.8165722363\C,0,4.5248069018,4.5706320584,0.427036318  
7\H,0,5.9498927461,2.9564000265,0.6663889854\C,0,3.2505128438,5.060364  
7467,0.7486807676\H,0,5.1845127727,5.1552245976,-0.221292493\H,0,2.919  
1609386,6.0228671601,0.3456975347\C,0,-0.0927567488,2.2549207414,6.638  
1968961\C,0,-1.1845953069,2.8414574522,5.750592578\C,0,0.4858058372,3.  
6363510676,6.9122831252\C,0,-0.8400173978,4.2415599757,6.3515206415\H,  
0,-2.2055289859,2.4506247551,5.8956313704\H,0,-0.9350573717,2.76767793  
32,4.6809042161\H,0,0.792117674,3.8932233583,7.9372502053\H,0,1.342978  
8014,3.83942007,6.2438799\H,0,-1.5321891827,4.5317574615,7.1570520439\  
H,0,-0.7442843567,5.0789713924,5.6440111715\\Version=ES64L-G09RevD.01\  
State=1-A\HF=-2778.7593211\RMSD=2.690e-09\Dipole=-0.871251,-0.1964812,  
1.5042485\Quadrupole=1.2918172,6.9264724,-8.2182896,-6.1877274,-3.2701  
277,-3.3882347\PG=C01 [X(C49H55N1O8Rh2)]\@

## **!TS8**

1\1\GINC-SHI\_02\SP\RBPW91\GenECP\C49H55N1O8Rh2\YIN\05-Jul-2016\0\#\#p g  
enecp bpw91 geom=check scrf=(iefpcm,smd,solvent=chlorobenzene)\Title  
Card Required\0,1\rh,0,-1.8635083595,-1.8267819932,0.2713382926\rh,0,  
-0.2176219036,-0.0516605001,-0.052995422\o,0,-0.6756386327,-2.60889784  
25,1.7447028123\C,0,0.424181394,-2.0197517144,2.0366412972\o,0,0.88618  
41309,-0.9562990918,1.4777083899\o,0,-2.8135853146,-0.6855944985,1.685  
9091601\C,0,-2.3237061585,0.4705289835,1.9477104011\o,0,-1.289555837,0  
.9885415267,1.386874879\o,0,-2.972873581,-0.9712215856,-1.2511734878\C  
,0,-2.5375325919,0.0906551611,-1.8210816421\o,0,-1.4435969176,0.706645  
533,-1.5356809991\o,0,-0.8815483018,-2.9556590605,-1.1124486374\C,0,0.  
156240466,-2.4801279398,-1.6875225022\o,0,0.6602984993,-1.3114900309,-  
1.469771953\C,0,0.9851301455,2.6908481057,-0.2672744944\C,0,2.20375707  
07,3.5162119531,-0.3172897643\C,0,-0.2890806263,3.3791830417,-0.260731  
1936\C,0,3.4353840728,2.7893609098,-0.4647689748\C,0,2.0998051732,4.92  
08366243,-0.1887658076\C,0,-0.3389585386,4.7570208383,-0.1605838954\H,  
0,-1.1994123932,2.7841321493,-0.2849895302\C,0,0.8524660823,5.53362622  
12,-0.1157501572\H,0,3.0118678787,5.5235569698,-0.1940663082\H,0,-1.31  
04387619,5.259033013,-0.1279426163\H,0,0.7856669702,6.623872305,-0.057  
950806\N,0,1.1446879596,1.379376626,-0.0775937323\C,0,4.6790509056,3.2  
842913507,0.1819245066\C,0,4.6608690876,3.7377308813,1.5223393873\C,0,  
5.9047074695,3.3356333412,-0.5223897518\C,0,5.8284540218,4.2050253871,  
2.139136168\H,0,3.7225640312,3.7005501307,2.0822034688\C,0,7.071017331  
3,3.8062647804,0.0939974269\H,0,5.9315646653,3.0278758327,-1.571502242  
7\C,0,7.0385535787,4.2397683713,1.4288260113\H,0,5.7941522574,4.538313

4891,3.1804995913\H,0,8.0061785532,3.8434231059,-0.4724677399\H,0,7.94  
98366319,4.6053523039,1.9105522401\C,0,1.2764770613,-2.6210701339,3.17  
96807847\C,0,0.8564852455,-3.3618478775,-2.7461643083\C,0,0.6075165676  
, -3.88561175,3.7508835023\H,0,1.2211741394,-4.2848048319,4.5767287827\  
H,0,-0.3950413475,-3.6596139659,4.1445067548\C,0,2.3599597052,-3.57503  
77407,-2.3469084387\H,0,2.8093019174,-4.2070366467,-3.1336411719\H,0,2  
.8639180254,-2.595293381,-2.3946060837\C,0,0.8162273939,-2.6119178296,  
-4.1014728534\H,0,1.3131524599,-1.6326557593,-4.0332259388\H,0,1.32663  
99264,-3.2106462288,-4.8746662385\H,0,-0.2228311419,-2.4502095171,-4.4  
321645763\C,0,1.4079855048,-1.5482537145,4.2899422229\H,0,2.0394513136  
, -1.93221228,5.1091493431\H,0,1.8609751177,-0.6248133083,3.8988588076\  
H,0,0.4215891621,-1.2980322643,4.714458707\C,0,2.7171525525,-2.9450142  
084,2.6438421483\H,0,3.1986937998,-1.9897286858,2.3772312564\H,0,3.283  
7354528,-3.3694833285,3.4918757179\C,0,-3.0317419454,1.306971541,3.037  
9121928\C,0,-3.3998275755,0.678930694,-2.9627643287\C,0,-4.5198506754,  
1.5627424098,2.6009907758\H,0,-4.9778786913,2.1861892014,3.3894294575\  
C,0,-4.8267818091,1.0257811285,-2.4017625234\H,0,-5.3971066127,1.46817  
15112,-3.2380175641\H,0,-5.3225242045,0.0772827194,-2.1371818323\C,0,-  
4.8528430401,1.9527296338,-1.2018347835\C,0,-4.9667735116,3.3512917258  
, -1.3301874301\C,0,-4.7487956139,1.4089160616,0.0919048066\C,0,-4.9578  
357708,4.1710751501,-0.19146185\H,0,-5.0786076618,3.7989516862,-2.3228  
205718\C,0,-4.7027051669,2.2150312181,1.2442880415\H,0,-4.6920110429,0  
.3234572154,0.2050243989\C,0,-4.8180514668,3.610505579,1.0872286324\H,  
0,-5.0683151691,5.254327673,-0.3010048485\H,0,-4.8153013391,4.25890564  
55,1.9692537771\C,0,-3.0514374031,0.4720539646,4.3429404754\H,0,-2.027  
748834,0.2886552225,4.7086814852\H,0,-3.5967847812,1.0220240113,5.1285  
115518\H,0,-3.5431408853,-0.4997660436,4.1876794325\C,0,-2.2955016852,  
2.6371761245,3.2851096082\H,0,-2.8074894255,3.195429825,4.0875827242\H  
,0,-1.2550393052,2.4613394329,3.5976058053\H,0,-2.2700521361,3.2666438  
3,2.3844183922\C,0,-3.5649705428,-0.4143379968,-4.0481085624\H,0,-4.21  
94733369,-0.0442775867,-4.85544971\H,0,-2.5921123877,-0.6753786914,-4.  
4965670899\H,0,-4.0088362303,-1.32887117,-3.6271245382\C,0,-2.73549578  
1,1.925008974,-3.5778025359\H,0,-1.7387815694,1.6854001825,-3.97839656  
95\H,0,-3.3588547358,2.3019284974,-4.406705021\H,0,-2.6141804124,2.730  
7669167,-2.8399231223\H,0,-5.0436053377,0.5924671759,2.6099361909\H,0,  
0.4987936495,-4.6686913183,2.9867933068\C,0,0.1327578311,-4.7155119051  
, -2.883022522\H,0,0.6358034543,-5.3225258762,-3.6551522959\H,0,0.13810  
43317,-5.2779718895,-1.938479269\H,0,-0.9164131102,-4.5759841987,-3.18  
45011049\C,0,2.7738554765,-3.8859163805,1.4559504426\C,0,2.6246206949,  
-3.3680106256,0.1563714148\C,0,2.9528519312,-5.2754567178,1.6027100015  
\C,0,2.5964162458,-4.1933960385,-0.9821779114\H,0,2.5097430159,-2.2885  
51885,0.0318735441\C,0,2.9626913031,-6.112768002,0.4772257674\H,0,3.09  
43903123,-5.7023141309,2.6007523834\C,0,2.7772758659,-5.5793821786,-0.  
8068285767\H,0,3.1161320606,-7.1889749313,0.6016283922\H,0,2.783334891  
9,-6.2416157789,-1.6784894846\C,0,3.3615151828,1.5567488701,-1.1192292

048\C,0,2.7133714132,1.1960089264,-2.4671013556\C,0,4.4211300146,0.487  
9086201,-1.3091142909\C,0,4.0716309044,0.5155310361,-2.8313561032\H,0,  
2.3661952414,2.044253501,-3.0777090507\H,0,1.9091377186,0.4542168798,-  
2.3791071883\H,0,5.449101232,0.6951424144,-0.9772479708\H,0,4.08957279  
45,-0.4600351295,-0.8513315377\H,0,4.7377734894,1.1919848008,-3.389510  
5816\H,0,4.0213518263,-0.4535907507,-3.3510334636\\Version=EM64L-G09Re  
vA.01\State=1-A\HF=-2778.7544289\RMSD=2.209e-09\Dipole=1.1740233,1.265  
8066,-0.6742155\Quadrupole=-4.5437661,-3.5848222,8.1285883,-2.5826575,  
-1.4666921,5.3954146\PG=C01 [X(C49H55N1O8Rh2)]\@

## **IN6**

1\1\GINC-SHI\_02\SP\RBPW91\GenECP\C49H55N1O8Rh2\YIN\22-Sep-2016\0\#\#p g  
enecp bpw91 geom=check scrf=(iefpcm,smd,solvent=chlorobenzene)\Title  
Card Required\0,1Rh,0,-0.0591769151,-0.0338954772,-0.0139718179Rh,0  
,0.0020954538,-0.1077742692,2.4130132225\O,0,1.9834052869,0.0587111322  
, -0.0449760189\C,0,2.620106358,0.0444525872,1.0648714464\O,0,2.0836276  
679,-0.0283795458,2.2351170345\O,0,0.0504464465,-2.0859567298,-0.04697  
22057\C,0,0.0870482615,-2.7216344911,1.0667987688\O,0,0.0848470022,-2.  
1846868494,2.2351637473\O,0,-2.1134185064,-0.1067251599,0.0838798846\C  
,0,-2.6751667336,-0.1924553918,1.2351967318\O,0,-2.064540608,-0.208684  
8743,2.3660777612\O,0,-0.1306644768,2.0071770982,0.0786017625\C,0,-0.1  
117285132,2.5784275188,1.2240695669\O,0,-0.0789013185,1.9735070588,2.3  
621121906\C,0,-0.8138487559,0.7434002567,5.3284265985\C,0,-0.585974756  
6,0.5833834071,6.7716895649\C,0,-1.7946193459,1.6936678112,4.880544644  
2\C,0,0.3853676478,-0.3910351289,6.9307196015\C,0,-1.3018671016,1.3975  
324448,7.7142566534\C,0,-2.4677719446,2.4370537442,5.823928511\H,0,-1.  
9861936724,1.8038836981,3.8162221854\C,0,-2.219454765,2.3036081518,7.2  
394880874\H,0,-1.1022170158,1.2956459304,8.7838872693\H,0,-3.218199995  
7,3.1627913986,5.4958597212\H,0,-2.7741569869,2.9397422832,7.934753455  
7\N,0,-0.0436955541,-0.0706302726,4.6001533687\C,0,0.8501010661,-0.935  
7227826,8.219049429\C,0,-0.103078533,-1.3789655048,9.1701592258\C,0,2.  
2200918478,-1.0119604943,8.5679929922\C,0,0.2981313114,-1.8855744325,1  
0.4128120522\H,0,-1.164695983,-1.3445077285,8.9112484878\C,0,2.6175765  
978,-1.511893471,9.8143478877\H,0,2.9765018141,-0.6465127453,7.8705746  
215\C,0,1.6605097448,-1.9542507826,10.7407993274\H,0,-0.4567629754,-2.  
2319144761,11.1246055834\H,0,3.681598586,-1.5500582782,10.0649028173\H  
,0,1.9747951022,-2.3481255489,11.7113039552\C,0,4.1654426865,0.0917467  
128,1.0028076275\C,0,-0.1638119062,4.1248162168,1.255485666\C,0,4.6442  
672124,0.2759391626,-0.4502621994\H,0,5.7475056803,0.2900673326,-0.474  
1613464\H,0,4.2959388906,-0.5489458755,-1.0896764225\C,0,1.0102910572,  
4.6811695998,2.1370653476\H,0,0.8969822883,5.7798653139,2.1591384479\H  
,0,0.8595966801,4.3182777629,3.1670674586\C,0,-1.5003480558,4.54205694  
83,1.9205925397\H,0,-1.5699696565,4.1604159004,2.9505568545\H,0,-1.572  
3199298,5.6424422102,1.9528922009\H,0,-2.3627340367,4.1650298966,1.346  
1343222\C,0,4.7055781034,-1.2512611233,1.5574364436\H,0,5.8084297448,-

1.249152981,1.5311947397\H,0,4.3846504676,-1.4159563189,2.5972990108\H  
,0,4.3553734307,-2.099553515,0.94667746\C,0,4.7015862501,1.2501042299,  
1.91695941\H,0,4.4234669493,1.0162102279,2.9578774905\H,0,5.8043397901  
,1.2149419496,1.860490097\C,0,0.168416231,-4.264517372,0.9708744596\C,  
0,-4.2210353351,-0.2488825938,1.2571585257\C,0,-0.9988566579,-4.793749  
6475,0.0624411013\H,0,-0.8809155636,-5.8904918725,0.0020002761\C,0,-4.  
7189967266,-1.3992686688,0.310742934\H,0,-5.8231405981,-1.3782600007,0  
.3400266009\H,0,-4.4163892994,-1.1436457644,-0.7180016087\C,0,-4.21496  
92913,-2.7873163001,0.6553058411\C,0,-4.9551344692,-3.6790128903,1.456  
5322541\C,0,-2.9568865135,-3.2033605804,0.1828980408\C,0,-4.4336945174  
, -4.9397556377,1.783018888\H,0,-5.9480859055,-3.390416788,1.8161107407  
\C,0,-2.3977790352,-4.4457945097,0.5331198107\H,0,-2.3895692237,-2.534  
0613626,-0.4670859747\C,0,-3.1596888066,-5.3188362121,1.3346005122\H,0  
, -5.0245926182,-5.6316232564,2.3909514112\H,0,-2.7593462133,-6.3031280  
548,1.5982035996\C,0,1.511366103,-4.6179001197,0.2807154821\H,0,2.3680  
326823,-4.2829921223,0.8888745426\H,0,1.5922219089,-5.7111934873,0.156  
6806785\H,0,1.5843090927,-4.1460594159,-0.7108548543\C,0,0.1133359879,  
-4.9206638038,2.3616348376\H,0,0.1858946211,-6.0165472203,2.2544553306  
\H,0,0.9507658772,-4.5856855181,2.9917933342\H,0,-0.8253077787,-4.6870  
838448,2.884752965\C,0,-4.7440506937,1.097138047,0.6918333236\H,0,-5.8  
466712914,1.0852941175,0.6573473535\H,0,-4.4362578248,1.940823781,1.33  
16645922\H,0,-4.3632699573,1.2767509102,-0.3251114861\C,0,-4.750102260  
7,-0.4530685435,2.6891168921\H,0,-4.4287294784,0.3621543203,3.35419138  
46\H,0,-5.8534861859,-0.470536161,2.674035071\H,0,-4.3934754154,-1.398  
5632064,3.1225273011\H,0,-0.8419291237,-4.3933412965,-0.9523375886\H,0  
,4.2749218457,1.2164937881,-0.883364956\C,0,-0.0985663111,4.6977942608  
, -0.1732456005\H,0,-0.1526182466,5.7992352443,-0.1301786013\H,0,0.8341  
243134,4.4151165895,-0.6819007477\H,0,-0.939114848,4.3349822622,-0.783  
6730323\C,0,4.2066072236,2.6385716587,1.5606713228\C,0,2.9544922177,3.  
0713953184,2.0339769201\C,0,4.9505187223,3.5123809083,0.7435974311\C,0  
,2.4046061914,4.313366655,1.6681194555\H,0,2.3834618657,2.4163463338,2  
.6952499976\C,0,4.4382404203,4.7726498578,0.4015574961\H,0,5.938059884  
3,3.2088569714,0.3813822615\C,0,3.1695136531,5.1681164923,0.8503007753  
\H,0,5.0308185458,5.4498308763,-0.221015114\H,0,2.7735626474,6.1498293  
56,0.5712180801\C,0,0.7204463222,-0.8940435728,5.5429276505\C,0,2.2127  
878026,-1.2296775254,5.1932963028\C,0,0.4583425063,-2.4682162323,5.444  
2925066\C,0,1.9825711677,-2.7165639231,5.5632991911\H,0,2.9826572764,-  
0.6559075923,5.7303561691\H,0,2.3529974863,-1.0868677518,4.1151001231\  
H,0,-0.2036701374,-2.8892945621,6.2149880548\H,0,0.074771284,-2.691541  
1701,4.442559365\H,0,2.2914983036,-2.9549165862,6.5915786254\H,0,2.411  
4532252,-3.4662654982,4.8810393332\\Version=EM64L-G09RevA.01\State=1-A  
\HF=-2778.8192036\RMSD=2.084e-09\Dipole=0.1729578,-0.3760128,2.3584891  
\Quadrupole=4.1706641,-1.5922363,-2.5784278,-14.2222974,-2.5122178,-6.  
7922116\PG=C01 [X(C49H55N1O8Rh2)]\@



'TS9

1\1\GINC-SHI\_02\SP\RBPW91\GenECP\C49H55N1O8Rh2\YIN\07-Jul-2016\0\#\#p g  
enecp bpw91 geom=check scrf=(iefpcm,smd,solvent=chlorobenzene)\Title  
Card Required\0,1\Rh,0,1.3901940129,-1.9396128758,-1.0136472641\Rh,0,  
0.1882121906,-0.1310145566,0.0638673247\O,0,0.0040989768,-1.9310301511  
, -2.5158032903\C,0,-0.9583699701,-1.0866452801,-2.4673096025\O,0,-1.14  
20031339,-0.2090335793,-1.5418358007\O,0,2.4741071446,-0.5311393591,-2  
.0315878325\C,0,2.2657959166,0.7171709949,-1.816221516\O,0,1.392311411  
7,1.1950242216,-1.0009825868\O,0,2.7361975394,-1.8983701708,0.54725609  
77\C,0,2.5880856305,-1.0200727256,1.4721852759\O,0,1.6326995519,-0.163  
4715862,1.5439020448\O,0,0.2510135806,-3.291898638,0.0066440949\C,0,-0  
.6479082922,-2.851049323,0.8070407001\O,0,-0.8923487615,-1.6089570936,  
1.0411913547\C,0,-1.3920861408,1.2554030084,2.392823468\C,0,-2.4604130  
269,2.1714488983,2.6550433367\C,0,-0.9111494263,0.4124172407,3.4023790  
623\C,0,-2.6975369617,2.8707765442,1.4149011532\C,0,-3.0727851114,2.20  
20646436,3.9241755359\C,0,-1.5108766119,0.4830052915,4.6729905298\H,0,  
-0.0870929892,-0.2705990883,3.2031275012\C,0,-2.5850612802,1.358473487  
7,4.9314544503\H,0,-3.9202814866,2.8654486813,4.1182912849\H,0,-1.1363  
687669,-0.1597923313,5.4752445412\H,0,-3.0417791965,1.3791914379,5.924  
9055\N,0,-0.9751697374,1.3726873202,1.0523052502\C,0,-3.6382779143,3.9  
70098698,1.1919245642\C,0,-3.7985866285,4.9911742752,2.16650275\C,0,-4  
.4217826061,4.0576886118,0.0118746742\C,0,-4.6923977777,6.048057288,1.  
9652003836\H,0,-3.1878837573,4.9583605096,3.0723152053\C,0,-5.31611505  
52,5.116876579,-0.185797338\H,0,-4.3633555248,3.2539501799,-0.72625890  
73\C,0,-5.4562019221,6.1175619841,0.7880817509\H,0,-4.7890253775,6.826  
5936058,2.7276427539\H,0,-5.917752836,5.1523650827,-1.0987389074\H,0,-  
6.1568941247,6.9428487494,0.6337709157\C,0,-1.9778518515,-1.0931768892  
, -3.6307624973\C,0,-1.4948001763,-3.8860940459,1.5829559343\C,0,-1.672  
0168982,-2.238505036,-4.6148025931\H,0,-2.402622854,-2.2176793033,-5.4  
416072672\H,0,-0.6636715133,-2.1342488013,-5.0429813867\C,0,-3.0228303  
808,-3.589337608,1.3727532002\H,0,-3.5741839792,-4.3375440124,1.969817  
1259\H,0,-3.2380652869,-2.6012082048,1.8112412177\C,0,-1.1788111294,-3  
.7195808669,3.0916890004\H,0,-1.421359017,-2.7043874739,3.4400758977\H  
,0,-1.7729277744,-4.4412543735,3.677547615\H,0,-0.1133214634,-3.916491  
2445,3.2962345718\C,0,-1.8665676725,0.2671864565,-4.3652701647\H,0,-2.  
5934504382,0.3054093352,-5.1942551765\H,0,-2.0714821507,1.1065824497,-  
3.6834516497\H,0,-0.8598996397,0.4036182445,-4.7937575581\C,0,-3.43540  
62559,-1.2202512235,-3.0592003846\H,0,-3.6390461657,-0.3230222084,-2.4  
517485498\H,0,-4.119607797,-1.1886323592,-3.9260453274\C,0,3.130663206  
9,1.6994629003,-2.6417419142\C,0,3.6356012425,-1.0213984892,2.61064406  
74\C,0,4.649253594,1.3356054931,-2.4662837705\H,0,5.2185364677,2.04178  
51732,-3.0968469734\C,0,5.0816425665,-0.9618369281,1.9996343559\H,0,5.  
7861059125,-1.0049005266,2.8494297244\H,0,5.2344781457,-1.8771420571,1  
.4044948051\C,0,5.3744354331,0.254178471,1.1420393991\C,0,5.9880565862  
,1.4112343164,1.661348788\C,0,5.0032619596,0.2491590788,-0.2148686056\

C,0,6.2001310206,2.5304301116,0.8425089668\H,0,6.3098766757,1.4325297152,2.7074926493\C,0,5.1641291877,1.3764602508,-1.040492267\H,0,4.5617496733,-0.6557974516,-0.6370490254\C,0,5.7812845362,2.5201913022,-0.4963659222\H,0,6.6942406023,3.4171886317,1.2510623639\H,0,5.9450847655,3.4010203358,-1.1257509922\C,0,2.7598289049,1.5030579485,-4.1349203371\H,0,1.7032085919,1.7598306421,-4.3177770479\H,0,3.3811843286,2.1631675893,-4.7636462192\H,0,2.9234254425,0.4617778842,-4.4511323817\C,0,2.87496803341\H,0,1.8210872735,3.4347694279,-2.3900991503\H,0,3.1211636331,3.3300119869,-1.175787122\C,0,3.4912644919,-2.365674533,3.3701349286\H,0,4.2374063687,-2.4194303878,4.1809424695\H,0,2.4915072757,-2.4567340895,3.8261140926\H,0,3.6439326661,-3.2221618485,2.6957929636\C,0,3.4046693654,0.153415295,3.5794998061\H,0,2.4086517133,0.1002294092,4.0433125958\H,0,4.1603059609,0.120443561,4.3830202155\H,0,3.4847211127,1.123142383,3.0673184625\H,0,4.8046078205,0.3280750382,-2.885302513\C,0,0.4110407909,4.2429931583,0.3819277431\C,0,-1.3995526691,2.9463375562,-0.8320533675\H,0,1.4006672305,4.6652067921,0.198790135\H,0,0.2482857846,3.7375033392,1.3351805853\H,0,-0.7240733919,2.2807464803,-1.3818503114\H,0,-2.2801777241,3.1534452111,-1.4589670289\C,0,-1.765237989,2.3326559025,0.4795893824\H,0,-1.7295572623,-3.2208054709,-4.1245289129\C,0,-1.1448756725,-5.3179610443,1.1349668308\H,0,-1.7472585519,-6.0396055109,1.7129987167\H,0,-1.3495375292,-5.4716571544,0.065652373\H,0,-0.0812611617,-5.5397446841,1.3099114533\C,0,-3.7005233618,-2.4623222527,-2.2308137527\C,0,-3.362941495,-2.469197993,-0.8650986471\C,0,-4.2520317869,-3.6319911614,-2.7893248205\C,0,-3.4975470421,-3.619762132,-0.0669778107\H,0,-2.9711713254,-1.555793726,-0.4119416476\C,0,-4.4370797551,-4.7760142444,-1.9989852229\H,0,-4.5455559619,-3.6444747029,-3.8439538652\C,0,-4.0520628622,-4.7760963873,-0.6502092781\H,0,-4.8813669682,-5.6744386424,-2.4380095807\H,0,-4.1917916386,-5.6765291381,-0.043451649\C,0,-0.6608472167,4.3333775948,-0.6090973577\H,0,-0.2978147525,4.7285210791,-1.5726904502\H,0,-1.4575105585,5.0305586094,-0.2589191786\\Version=EM64L-G09RevA.01\\State=1-A\\HF=-2778.7604075\\RMSD=4.316e-09\\Dipole=-0.1037145,2.3544871,-0.7125886\\Quadrupole=-14.3022821,10.8388759,3.4634062,-1.0444533,9.3747078,-13.6500447\\PG=C01 [X(C49H55N1O8Rh2)]\\@

## 'TS10

1\1\GINC-A724\FTS\RBPW91\GenECP\C49H55N1O8Rh2\SIOC001\05-Jul-2016\0\#\#  
p opt=(calcf,ts,noeigen) genecp bpw91\\Title Card Required\\0,1\\Rh,0.9928038316,-2.4041445734,0.0430871535\\Rh,0.1186888608,-0.1440245901,-0.075347203\O,-0.3301417539,-2.9561354681,-1.4092911371\C,-1.118581415,-2.082696141,-1.9123681945\O,-1.1761427998,-0.8375175383,-1.5801617804\O,2.3446932268,-1.9096537082,-1.4310280261\C,2.3261488924,-0.7166473299,-1.9054725436\O,1.5299798346,0.224830849,-1.5425218362\O,2.2881447747,-1.7880899634,1.5197824319\C,2.2470118573,-0.5597697197,1.8904338359\O,1.4629651165,0.3412483461,1.4175692922\O,-0.3811927157,-2.8171310812,1.4947421785\C,-1.1985460194,-1.9041774718,1.8679213419\O,-1.251778

7597,-0.702326113,1.4044832976\C,0.3263326214,3.0440046869,-0.03723418  
1\C,-0.4068365483,4.2852254679,0.0405510587\C,1.7434249234,3.067393253  
4,-0.0585100438\C,-1.788001254,3.9380665507,0.034080313\C,0.2739755321  
,5.5243295805,0.1666536097\C,2.3827478107,4.2976962069,0.0434583688\H,  
2.3063284595,2.1408059184,-0.1468931686\C,1.6613225296,5.5197935001,0.  
1697355\H,-0.2860199429,6.4569177896,0.2740344892\H,3.4761123908,4.325  
4020599,0.0367720436\H,2.2104121622,6.4601226114,0.269458598\N,-0.5213  
304181,1.9594527754,-0.1040492765\C,-2.913334055,4.8408973835,0.342051  
4667\C,-3.0381174312,6.0861343007,-0.3189619244\C,-3.8595334452,4.5112  
972614,1.3401196707\C,-4.0758744236,6.9687170453,0.0052355433\H,-2.321  
3072523,6.352502019,-1.1007258903\C,-4.894273675,5.3980372723,1.664805  
6011\H,-3.7607727719,3.5678591124,1.8823413302\C,-5.0076726225,6.62791  
87552,0.9981748632\H,-4.1585931046,7.9243496854,-0.5201625903\H,-5.610  
7817047,5.1293727789,2.4461345829\H,-5.8169022096,7.3179394021,1.25251  
86085\C,-2.0788784982,-2.5631062695,-3.0277828695\C,-2.2023091215,-2.2  
758942228,2.9869312806\C,-1.8245200015,-4.0456901011,-3.3610525128\H,-  
2.5038619618,-4.3616209534,-4.1716435375\H,-0.788848523,-4.2038242004,  
-3.6982155328\C,-3.6724330961,-2.1171512997,2.456445336\H,-4.341822648  
2,-2.4166891074,3.2826986647\H,-3.84930129,-1.0439439917,2.2730680792\  
C,-2.0053638675,-1.2858509511,4.1616718625\H,-2.1350306793,-0.24436816  
6,3.830939985\H,-2.7375919445,-1.4974822448,4.9595035839\H,-0.99653219  
72,-1.3859126394,4.5946893355\C,-1.835240521,-1.6969214843,-4.28839419  
02\H,-2.5326473579,-1.9941604643,-5.0900697536\H,-1.982788988,-0.62782  
37091,-4.0739136067\H,-0.8088790995,-1.8331648145,-4.6667773536\C,-3.5  
675225205,-2.3530425926,-2.5720760819\H,-3.7471586663,-1.2669882195,-2  
.4997401381\H,-4.2057422179,-2.7291194792,-3.3916519014\C,3.3528181718  
, -0.398015576,-3.0177987395\C,3.2264472103,-0.1437662157,3.0125481394\  
C,4.8006508689,-0.6900860698,-2.4791007075\H,5.5005274594,-0.436806562  
6,-3.2954987718\C,4.6958834733,-0.4722792262,2.5611784379\H,5.35974415  
85,-0.1447435469,3.3811429703\H,4.7864505078,-1.5686192974,2.488938691  
\C,5.1398293449,0.1515143295,1.2516561545\C,5.8219330226,1.3833845309,  
1.1979497798\C,4.8626853821,-0.5097135483,0.0404075034\C,6.1931039713,  
1.9354857033,-0.0375755506\H,6.0769768344,1.9036699764,2.1267098681\C,  
5.1913811978,0.0446707311,-1.2109189879\H,4.3651744012,-1.481756753,0.  
0732101548\C,5.8719967044,1.2782605568,-1.2350808501\H,6.7427230776,2.  
8814441299,-0.0674633946\H,6.1660896972,1.7178885881,-2.1935863644\C,3  
.0825202978,-1.3559121763,-4.205585444\H,2.0869532796,-1.1711858878,-4  
.6421850312\H,3.8337656953,-1.1928625322,-4.9970022471\H,3.130522967,-  
2.4077881918,-3.8862515965\C,3.2283918658,1.0618212519,-3.4915930692\H  
,3.9533115096,1.2484608211,-4.3027123201\H,2.2189859512,1.2675976062,-  
3.8792691501\H,3.4254501696,1.7749820025,-2.6786341499\C,2.9087923039,  
-1.0019444522,4.263585625\H,3.6227708962,-0.7658709082,5.0709920109\H,  
1.8938013143,-0.79007216,4.6384213353\H,2.9771560473,-2.0764835091,4.0  
365351251\C,3.07887276,1.3492155701,3.3584012291\H,2.0546690417,1.5792  
311815,3.6891378963\H,3.7722140191,1.6067100474,4.1777044936\H,3.30261

63597,1.9942452818,2.4970443976\H,4.879977213,-1.7762171999,-2.3080017  
536\H,-1.9946445986,-4.6926154454,-2.4887439575\C,-1.9619129544,-3.717  
6551325,3.4745254463\H,-2.667280602,-3.951670256,4.2906183494\H,-2.106  
4739484,-4.4487966879,2.6662899418\H,-0.937935882,-3.8408867747,3.8582  
770057\C,-3.9606758452,-3.0110847279,-1.2628243924\C,-3.7153401335,-2.  
3379623039,-0.0537270705\C,-4.5642115223,-4.2824054535,-1.2023649123\C  
, -4.0122502911,-2.8977989832,1.200863458\H,-3.2674833213,-1.344020289,  
-0.086252959\C,-4.8923372679,-4.8520581384,0.037369308\H,-4.7892204238  
, -4.8228736031,-2.1273330361\C,-4.6149822879,-4.1704556104,1.232317709  
4\H,-5.3727969264,-5.8344920625,0.0725155747\H,-4.8796788842,-4.624442  
6791,2.1925786916\C,-2.4029447777,3.0174217553,-1.8590104956\C,-1.7997  
450987,2.4674731012,-0.1381203787\C,-3.0451443823,1.5929314681,-0.2139  
844521\C,-3.6846601048,2.3045151812,-1.4300119465\H,-3.6458994816,1.54  
89279491,0.7065646493\H,-2.7179395136,0.5794130095,-0.4715446966\H,-2.  
4652241422,4.0459167944,-2.2328738263\H,-1.6826730978,2.4171099519,-2.  
4268688483\H,-4.4605037833,3.0255892615,-1.1351367265\H,-4.1048202054,  
1.6376861765,-2.2001791521\\Version=ES64L-G09RevD.01\State=1-A\HF=-277  
8.0553418\RMSD=6.867e-09\RMSF=4.675e-06\Dipole=-1.5622601,2.177562,-0.  
3607812\Quadrupole=0.7631815,-0.4295425,-0.333639,-4.6355988,-1.035738  
7,-1.6318722\PG=C01 [X(C49H55N1O8Rh2)]\@

### **3IN5**

1\1\GINC-SHI\_02\SP\UBPW91\GenECP\C49H55N1O8Rh2(3)\YIN\17-Jun-2016\0\#\#  
p genecp bpw91 geom=check scrf=(iefpcm,smd,solvent=chlorobenzene)\Tit  
le Card Required\0,3Rh,0,0.0485604001,-0.0149318919,0.0665225911\Rh,  
0,-0.1638926739,0.1478174571,2.4705248283\O,0,2.0799296769,0.038257861  
7,0.2738818478\C,0,2.5835729097,0.1268364076,1.4485891514\O,0,1.912102  
676,0.17849145,2.5473123518\O,0,0.1248523721,-2.0634044365,0.232285470  
8\C,0,0.0414622225,-2.5770552326,1.4061451568\O,0,-0.0890518955,-1.920  
0347925,2.5035468138\O,0,-2.0024592704,-0.0354868903,-0.092540655\C,0,  
-2.6942815653,0.0129654007,0.9877095993\O,0,-2.217331344,0.0852922419,  
2.1793080194\O,0,-0.0101271683,2.0245209116,-0.0381047928\C,0,-0.14775  
22236,2.7049280257,1.038506916\O,0,-0.2427503793,2.2122357444,2.226478  
1658\C,0,-0.8030448182,-0.5176766222,5.4508163508\C,0,-0.2100282838,-0  
.3589715536,6.7726802344\C,0,-1.8651985349,-1.4796020833,5.2788195805\  
C,0,0.8339871763,0.6624978562,7.0510127172\C,0,-0.6399513177,-1.221240  
2131,7.7962146613\C,0,-2.2771813102,-2.2787465868,6.3361836947\H,0,-2.  
3125193003,-1.5667518834,4.2884671503\C,0,-1.6594287938,-2.163742913,7  
.6001995546\H,0,-0.1687158906,-1.1310419562,8.779189815\H,0,-3.0777401  
032,-3.0082508906,6.181058651\H,0,-1.9794990749,-2.7997139988,8.429966  
295\N,0,-0.3491648122,0.189893059,4.4154484763\C,0,2.0510752167,0.2015  
756596,7.7888671251\C,0,2.7870102038,-0.9104032649,7.3191271399\C,0,2.  
4898516341,0.8387053549,8.9702625691\C,0,3.9382374685,-1.3460762691,7.  
9879294973\H,0,2.4504012199,-1.426205115,6.4153567094\C,0,3.6397995094  
,0.4006437615,9.6424377018\H,0,1.9072785835,1.6705227182,9.3750606016\

C,0,4.3725278153,-0.6899547374,9.1507602963\H,0,4.4987604104,-2.202154  
0596,7.6002066232\H,0,3.9579322024,0.9072923975,10.5586402868\H,0,5.26  
99229694,-1.0321398648,9.6743217228\C,0,4.1222268027,0.1598166035,1.57  
68615093\C,0,-0.2261946943,4.2423840802,0.9175819412\C,0,4.7826097418,  
0.111974797,0.1858165164\H,0,5.8799139503,0.1198283667,0.3010418678\H,  
0,4.5007862722,-0.8034841275,-0.3562698844\C,0,0.9031471819,4.89179107  
56,1.7957319632\H,0,0.8108868959,5.9851936291,1.6694317877\H,0,0.67892  
47025,4.6679693024,2.8515794557\C,0,-1.5978162174,4.6979062971,1.47743  
96936\H,0,-1.7319764689,4.3751934865,2.5206747426\H,0,-1.6696767768,5.  
7978466982,1.4371337428\H,0,-2.4251184326,4.2847206674,0.8772622728\C,  
0,4.558645947,-1.0726943984,2.408742998\H,0,5.6534121724,-1.0623561462  
,2.5427982893\H,0,4.0840651947,-1.0726860113,3.4012628079\H,0,4.291340  
3233,-2.0103126949,1.8939231271\C,0,4.5528265056,1.4535371808,2.358820  
8974\H,0,4.1625700802,1.3715416612,3.3865022903\H,0,5.6549738959,1.427  
686416,2.4267770078\C,0,0.120815537,-4.1169649389,1.5052688407\C,0,-4.  
2325950685,-0.004789548,0.8388837912\C,0,-1.0175419655,-4.7471730206,0  
.6234527652\H,0,-0.9320079527,-5.8426328811,0.7357769964\C,0,-4.657881  
1942,-1.302491806,0.0595231987\H,0,-5.759503914,-1.2767448329,-0.01708  
79593\H,0,-4.2594427889,-1.2249818756,-0.9655150603\C,0,-4.2069317704,  
-2.6132968784,0.6751847415\C,0,-5.0129679489,-3.33885723,1.5747812096\  
C,0,-2.9351064428,-3.1253407078,0.3581618005\C,0,-4.5407583412,-4.5284  
641186,2.1493625405\H,0,-6.0182740138,-2.9788257944,1.8155390899\C,0,-  
2.4274274738,-4.2952915184,0.9529029056\H,0,-2.3161596726,-2.591129808  
6,-0.3666009572\C,0,-3.2535236488,-4.9996406977,1.8508808205\H,0,-5.18  
16266292,-5.0938853009,2.8327061893\H,0,-2.8937692437,-5.9275961282,2.  
3066213817\C,0,1.4855226316,-4.5589044427,0.9181223515\H,0,2.319868290  
6,-4.1618013315,1.5193699638\H,0,1.5562732425,-5.6596288807,0.92922149  
62\H,0,1.6063815735,-4.20893775,-0.1179733211\C,0,0.0085481279,-4.5867  
897534,2.9676343865\H,0,0.0952266927,-5.6861197992,3.0066829677\H,0,0.  
811633,-4.1565738881,3.5847260261\H,0,-0.9500326465,-4.296587484,3.420  
3184113\C,0,-4.6409853984,1.2238818955,-0.0125741094\H,0,-5.7316590903  
,1.216161733,-0.1770300955\H,0,-4.3852168887,2.1636975998,0.5038615773  
\H,0,-4.1381301543,1.216990345,-0.9912090551\C,0,-4.9254799677,0.06252  
86115,2.2128507794\H,0,-4.6342388325,0.9711669483,2.7611418401\H,0,-6.  
0194362711,0.0814761629,2.0707104194\H,0,-4.6730116609,-0.8037809153,2  
.8408419916\H,0,-0.7962469579,-4.5110134631,-0.4304672118\H,0,4.490765  
403,0.9723644427,-0.4332989046\C,0,-0.095886227,4.6773237721,-0.554658  
1172\H,0,-0.1789652731,5.7756361943,-0.620346472\H,0,0.8686728928,4.37  
41854443,-0.9864730313\H,0,-0.8936842689,4.2350362916,-1.170357771\C,0  
,4.0989375103,2.7666215933,1.7499789103\C,0,2.824748897,3.2733923754,2  
.0656018436\C,0,4.9054405005,3.4986197301,0.8563322167\C,0,2.316709557  
1,4.445136033,1.4747441028\H,0,2.2049501177,2.7320414112,2.7843693116\  
C,0,4.4324952748,4.6896031325,0.2858974797\H,0,5.9112767468,3.14070684  
96,0.6146824053\C,0,3.1435054647,5.156190297,0.5831173414\H,0,5.072797  
8048,5.2582092244,-0.3951753823\H,0,2.7818127979,6.08441613,0.12932010

05\C,0,0.6721538854,1.9625540772,6.6856934351\C,0,-0.5001624158,2.7615  
116306,6.1282452549\C,0,1.5106722965,3.2269031864,6.8505797288\C,0,0.2  
00294664,4.0535863754,6.6553561412\H,0,-1.5002087879,2.5166774483,6.52  
41227991\H,0,-0.5492164065,2.7224569155,5.0275707962\H,0,2.0838868034,  
3.3724274013,7.778284754\H,0,2.2074162496,3.3551862096,6.0016827342\H,  
0,-0.2190907167,4.3925033145,7.6153642998\H,0,0.2512605564,4.911024608  
6,5.9670021099\\Version=EM64L-G09RevA.01\State=3-A\HF=-2778.7613191\S2  
=2.025598\S2-1=0.\S2A=2.000355\RMSD=4.640e-09\Dipole=-0.2008374,-0.024  
3497,0.1275063\Quadrupole=6.5843551,7.2082594,-13.7926145,-5.8471132,1  
.4543124,-4.2007527\PG=C01 [X(C49H55N1O8Rh2)]\@

### **<sup>3</sup>TS8**

1\1\GINC-A730\FTS\UBPW91\GenECP\C49H55N1O8Rh2(3)\SIOC001\11-Jul-2016\0  
\#p genecp bpw91 opt=(calcfc,ts,noeigen)\rh2esp2\_4m\_ts2\_triplet\_3\0  
,3\rh,-0.9421534994,-2.1959537618,0.8636942336\rh,-0.1639385786,-0.153  
330716,-0.199096068\O,0.6226083468,-2.0690099719,2.1669624291\C,1.4498  
477654,-1.0961277868,2.0628049095\O,1.3896097784,-0.1537445065,1.18479  
0692\O,-2.0640102735,-1.0560453438,2.1604252086\C,-2.0236196122,0.2201  
983602,2.0383466979\O,-1.3391462423,0.869031134,1.1647808805\O,-2.4944  
842412,-2.2861426634,-0.4816981031\C,-2.5900878861,-1.3548080855,-1.35  
89578417\O,-1.7907240153,-0.3552729927,-1.4774697752\O,0.2141574556,-3  
.2674322588,-0.4366127014\C,0.9058321035,-2.6523549316,-1.3210700675\O  
,0.9549238368,-1.3740216294,-1.482535018\C,-0.3087630958,2.7391624702,  
-1.1696988713\C,0.5081541377,3.9297394346,-1.3064864841\C,-1.731086000  
6,2.8828056679,-1.1677880313\C,1.9407763253,3.6221758879,-1.293746409\  
C,-0.0946284556,5.1929930214,-1.3874168002\C,-2.2985705292,4.152662615  
,-1.2797044054\H,-2.3515814404,1.9922275984,-1.0783103902\C,-1.4945024  
505,5.3079657071,-1.3829323592\H,0.5329243966,6.0849367084,-1.47019969  
77\H,-3.3882447559,4.2500715186,-1.2779073187\H,-1.9606011586,6.293389  
0249,-1.4680167951\N,0.3621156956,1.5693812959,-1.0493406754\C,2.89146  
4429,4.4542645211,-0.5405846028\C,2.4937844411,5.1188979142,0.64926438  
78\C,4.2199070134,4.6589845692,-0.9964862168\C,3.3896247452,5.92441282  
46,1.3603045148\H,1.4760190823,4.9750302648,1.0204135507\C,5.112456325  
7,5.4676480009,-0.2849364137\H,4.5361433845,4.2073086925,-1.9400627979  
\C,4.7047186631,6.1018108088,0.9000543667\H,3.0615476378,6.4130873378,  
2.2825657468\H,6.1279254472,5.6157106217,-0.6641626906\H,5.4031029116,  
6.7344908328,1.4550410608\C,2.6082862353,-1.0252133789,3.0834595959\C,  
1.743266856,-3.5129660737,-2.2959037204\C,2.5455371747,-2.217338614,4.  
0573555939\H,3.3633828854,-2.1318630762,4.7932918491\H,1.5909498583,-2  
.2345922685,4.6045758531\C,3.2539826884,-3.0946380905,-2.2046615658\H,  
3.8035900656,-3.7368006447,-2.9158435966\H,3.3401475813,-2.0591388991,  
-2.573585917\C,1.2465254588,-3.2259013916,-3.7354084489\H,1.3267574641  
, -2.1562197512,-3.9812165062\H,1.8486427992,-3.7994426149,-4.460263600  
2\H,0.1939285468,-3.5308576876,-3.8567041319\C,2.4701068582,0.30405938  
,3.8685800268\H,3.3039744556,0.4032941336,4.5838944527\H,2.4836847197,

1.1706879246,3.1906145889\H,1.5292801327,0.3259851678,4.4428867787\C,3  
.9828038419,-1.0030991779,2.3241853525\H,4.0379815405,-0.0604604558,1.  
7549718189\H,4.7698884168,-0.9595232635,3.0979271218\C,-2.8628228593,1  
.0426874716,3.0429684548\C,-3.7594651212,-1.4582032741,-2.364666316\C,  
-4.3626988364,0.5797452397,2.9579591891\H,-4.9254743485,1.1981210501,3  
.6798388657\C,-5.1159843802,-1.5097696899,-1.5719871007\H,-5.920577044  
3,-1.5683174786,-2.3265550965\H,-5.1364106228,-2.453389892,-1.00234774  
3\C,-5.3673725944,-0.3483856466,-0.6291155535\C,-6.0832363016,0.799647  
8554,-1.0227354427\C,-4.8628158375,-0.4012280741,0.6836761824\C,-6.265  
2261461,1.8640255933,-0.1268972269\H,-6.5134383038,0.8539501925,-2.027  
872893\C,-4.9988470562,0.6716624781,1.5842225684\H,-4.338848926,-1.302  
0117516,1.011565088\C,-5.718688915,1.8075297825,1.1640096373\H,-6.8410  
715108,2.7418510775,-0.4356530248\H,-5.8645373146,2.6442433858,1.85461  
14433\C,-2.3405473239,0.7224664824,4.4669552583\H,-1.2963558829,1.0554  
54233,4.5873999616\H,-2.9516881159,1.2533014446,5.2164422822\H,-2.3869  
692303,-0.3569636938,4.6758319268\C,-2.7368342775,2.5528547405,2.77152  
14687\H,-3.326332527,3.1099752836,3.5198559399\H,-1.6892474658,2.88168  
84904,2.8433780889\H,-3.1014960228,2.820152743,1.7699173001\C,-3.60119  
031467\H,-2.674183347,-2.794188997,-3.7342139281\H,-3.5728699086,-3.65  
05052726,-2.4491323405\C,-3.7493942289,-0.280928879,-3.3575149554\H,-2  
.8008316277,-0.2374988663,-3.913762199\H,-4.5697012824,-0.40748306,-4.  
0846728461\H,-3.8850039856,0.6846596691,-2.8496508329\H,-4.4132424204,  
-0.4622665243,3.3140958692\H,2.6492373895,-3.1773245801,3.5313428594\C  
,1.577233263,-5.0110276333,-1.9767723277\H,2.1627773689,-5.6061594796,  
-2.6984594617\H,1.9272142292,-5.2497890235,-0.9623322303\H,0.523400865  
1,-5.3187688572,-2.0509220832\C,4.2368231582,-2.1706001019,1.389468072  
1\C,3.7254841897,-2.1274862427,0.0802366758\C,4.9661979623,-3.31026866  
49,1.7809347176\C,3.8802297275,-3.1912229232,-0.8261990583\H,3.1797151  
788,-1.237265438,-0.238458168\C,5.1574139954,-4.3719781705,0.883796379  
3\H,5.3971263549,-3.3618516605,2.7859140103\C,4.613741893,-4.318875954  
3,-0.4085561128\H,5.7374637953,-5.2466065329,1.193219513\H,4.770791215  
, -5.1524563232,-1.1005744252\C,2.230318683,2.371974461,-1.8732643879\C  
,1.9158845474,1.9075454011,-3.3138939303\C,3.5214352107,1.5695296471,-  
1.8804557795\C,3.431691662,1.5583915392,-3.4389330875\H,1.4942253179,2  
.6687399627,-3.9882444184\H,1.2891517979,1.0045442304,-3.3396043686\H,  
4.4115841888,1.9785303542,-1.3815634809\H,3.3255930796,0.561193284,-1.  
4828917792\H,4.0094139408,2.3798374182,-3.8911897049\H,3.6860414735,0.  
6154358088,-3.9471945077\\Version=ES64L-G09RevD.01\State=3-A\HF=-2777.  
9996538\S2=2.020247\S2-1=0.\S2A=2.000242\RMSD=3.054e-09\RMSF=2.517e-06  
\Dipole=0.391936,0.9113331,-0.355881\Quadrupole=2.0526868,-3.6999542,1  
.6472674,-3.2898685,3.0090912,9.212573\PG=C01 [X(C49H55N1O8Rh2)]\@

### <sup>3</sup>IN6

1\1\GINC-SHI\_02\FOpt\UBPW91\GenECP\C49H55N1O8Rh2(3)\YIN\10-Oct-2016\0\  
\#p opt genecp bpw91\\Title Card Required\0,3\rh,0.0536712161,0.00939

11538,0.0595996566\Rh,0.0088239783,0.0381944019,2.4841988216\O,2.08831  
91232,-0.0209311416,0.1077879926\C,2.6813170704,-0.0354999006,1.243037  
0922\O,2.0942815393,-0.0135646324,2.3902836894\O,0.0693705206,-2.04190  
29519,0.1114737962\C,0.0604708614,-2.6253176652,1.2546076748\O,0.03668  
70484,-2.0295747163,2.3925061721\O,-1.9977255684,0.0473275196,0.049314  
6639\C,-2.6169243183,0.069113573,1.1731249528\O,-2.05606778,0.07917558  
71,2.3295996219\O,0.0452250492,2.0431682938,0.0510359259\C,0.022812191  
7,2.6763308762,1.163961517\O,0.020542996,2.1335340715,2.333388936\C,-0  
.9145376949,-1.0439751133,5.2237476827\C,-0.6230372847,-1.0844399904,6  
.6365306298\C,-1.8708882656,-1.9217426035,4.6756258803\C,0.3343274475,  
-0.0499840361,6.9088038199\C,-1.3079824625,-1.9891285256,7.4680862309\  
C,-2.5337401699,-2.8270734615,5.5278591241\H,-2.1067638977,-1.88756475  
19,3.615706917\C,-2.2609182068,-2.8617862764,6.9043996615\H,-1.1288545  
624,-1.9971306265,8.5455097719\H,-3.2796513588,-3.5028146537,5.1014427  
126\H,-2.7980833581,-3.5620522261,7.5503136592\N,-0.1735003432,-0.0658  
992918,4.5880797307\C,1.0686711876,0.1244622874,8.1452873797\C,1.38259  
73255,-1.0058600821,8.9595703622\C,1.517794159,1.3948711379,8.61030685  
5\C,2.0801999692,-0.8694958972,10.1610474512\H,1.1133506975,-2.0030711  
017,8.605004191\C,2.2111185963,1.5252153795,9.816392787\H,1.2825728987  
,2.2919607179,8.0368625233\C,2.4963551644,0.3978166141,10.6049627513\H  
,2.3147878279,-1.7606936104,10.7509997231\H,2.5254841503,2.5189857672,  
10.149300263\H,3.0395021837,0.5044459108,11.5478920358\C,4.2254400989,  
-0.0958407224,1.2429868779\C,-0.0184561029,4.2214840883,1.085800991\C,  
4.7565031421,-0.2675948218,-0.1932825984\H,5.8580594223,-0.3259554414,  
-0.170705225\H,4.3727370607,-1.1925899627,-0.6502235022\C,1.2888019032  
,4.8241412011,1.716835025\H,1.2373778962,5.9163618702,1.5603851624\H,1  
.2463451681,4.657658732,2.8056013633\C,-1.2285848539,4.7247580288,1.90  
98386811\H,-1.1699748087,4.386756314,2.9550340373\H,-1.2551138591,5.82  
74164431,1.8990165904\H,-2.1775749703,4.3612338839,1.4823171569\C,4.67  
10867705,-1.2955821038,2.1152398425\H,5.7724975158,-1.3340957848,2.161  
9584022\H,4.2791527722,-1.2140988725,3.1399216705\H,4.3188175125,-2.24  
79961859,1.6860807077\C,4.7984879578,1.2178569962,1.8900425831\H,4.538  
114777,1.2076775949,2.9616036982\H,5.8988400673,1.1449525626,1.8262110  
612\C,0.0929225161,-4.169586727,1.2479325893\C,-4.1605232037,0.1009239  
938,1.1208220398\C,-1.1087649332,-4.7012043155,0.3848901766\H,-1.05414  
81586,-5.8039718463,0.4136811952\C,-4.6711254561,-1.123907056,0.277557  
8883\H,-5.77393484,-1.0635546536,0.270563819\H,-4.3321411895,-0.980359  
9879,-0.7616123928\C,-4.2274145426,-2.4908529171,0.7650994521\C,-5.015  
2224849,-3.2705450916,1.6351195965\C,-2.9855206706,-3.0068435463,0.348  
8806448\C,-4.5553280156,-4.518796477,2.0819132684\H,-5.9983338728,-2.9  
07168476,1.9508188225\C,-2.4874042399,-4.2374391073,0.8171860758\H,-2.  
3853488997,-2.4292952589,-0.3576696691\C,-3.296219297,-4.9958288113,1.  
6866436865\H,-5.1851614368,-5.126499647,2.7387461086\H,-2.9461514226,-  
5.9696331508,2.0435169613\C,1.4106938901,-4.6101100996,0.5600269793\H,  
2.2867801927,-4.2779109413,1.1409043452\H,1.4469824566,-5.7106879123,0



.4952056026\H,1.4896492349,-4.1956898558,-0.4563266643\C,0.0410470589,  
-4.7372649994,2.6779408498\H,0.0916812753,-5.8387597596,2.6364393065\H  
,0.8900290083,-4.3767599823,3.2782192742\H,-0.8812601608,-4.4497277052  
,3.2016758916\C,-4.5791442918,1.3994957727,0.3843930429\H,-5.677136991  
4,1.4346229788,0.2843071651\H,-4.2639764403,2.2916807864,0.9502035027\  
H,-4.1336577029,1.4500705407,-0.6205574678\C,-4.7678223573,0.087543463  
7,2.5356527155\H,-4.4135163522,0.9447993974,3.1276620188\H,-5.86703490  
71,0.1494358991,2.4632013523\H,-4.5083157989,-0.8284017851,3.085359644  
6\H,-0.9327324335,-4.3951322235,-0.6594675118\H,4.4628399242,0.5721063  
486,-0.8389225606\C,-0.158633462,4.6790834644,-0.3797881286\H,-0.22409  
34733,5.7800779476,-0.4130451268\H,0.7002745798,4.3607956669,-0.987542  
1129\H,-1.0681520805,4.266052447,-0.8417191268\C,4.3208289838,2.517452  
201,1.2720276079\C,3.1362721165,3.1080171796,1.7463341775\C,5.01245211  
75,3.1603120581,0.2267685227\C,2.5987935212,4.2789182392,1.1825115001\  
H,2.6125924803,2.6369068653,2.5812296087\C,4.5102420546,4.3456555591,-  
0.3306996043\H,5.9533824929,2.7404965731,-0.1425075584\C,3.3084995087,  
4.8993124795,0.1361330539\H,5.062414928,4.8450672819,-1.1324033483\H,2  
.9286525131,5.8264366202,-0.3047628471\C,0.4580610561,0.7771141938,5.6  
36395355\C,-0.1580180799,2.2510618873,5.6810499293\C,1.8431417534,1.42  
37528599,5.2995333838\C,1.254217747,2.8533701121,5.4527948446\H,-0.664  
8577204,2.4992720604,6.6264912983\H,-0.8529317424,2.4123608366,4.84551  
41\H,2.6375938695,1.1534846243,6.0119538205\H,2.1742846841,1.168969013  
2,4.2859781576\H,1.6583741579,3.4256086294,6.3022459607\H,1.3341422491  
,3.4813225949,4.5554080285\\Version=EM64L-G09RevA.01\State=3-A\HF=-277  
8.0413395\S2=2.010024\S2-1=0.\S2A=2.000063\RMSD=3.550e-09\RMSF=7.373e-  
06\Dipole=-0.0306454,0.0022423,0.4288524\Quadrupole=3.5714482,7.056147  
8,-10.627596,-0.4165416,0.8102237,-3.2521501\PG=C01 [X(C49H55N1O8Rh2)]

### **<sup>3</sup>TS11**

1\1\GINC-A712\SP\UBPW91\GenECP\C49H55N1O8Rh2(3)\SIOC001\08-Jul-2016\0\  
\#p genecp bpw91 geom=check scrf=(iefpcm,smd,solvent=chlorobenzene)\T  
itle Card Required\\0,3\rh,0,-0.509999753,-2.4848648436,-0.0260477214\  
Rh,0,-0.0871131591,-0.1052921514,0.0926461803\O,0,0.9051978059,-2.7900  
300831,1.4023245803\C,0,1.513633325,-1.7837006528,1.9098405809\O,0,1.3  
26901076,-0.5518151581,1.5763199278\O,0,-1.9059414681,-2.2795511801,1.  
4687640683\C,0,-2.1176750871,-1.1083055678,1.9502053965\O,0,-1.5244996  
314,-0.0311648138,1.57567232\O,0,-1.9200076712,-2.1408212783,-1.476523  
061\C,0,-2.1274818906,-0.9282958631,-1.8462206082\O,0,-1.5251079811,0.  
1052806782,-1.3778607559\O,0,0.8857580319,-2.637765161,-1.4958546593\  
C,0,1.5003798333,-1.5845745682,-1.8904520237\O,0,1.3272981855,-0.397765  
6573,-1.4189309051\C,0,-0.8955471341,2.8941815382,-0.0151612254\C,0,-0  
.3912451093,4.2105611664,-0.2782150106\C,0,-2.2725751705,2.6556821439,  
0.058669863\C,0,1.0474250009,4.1162361323,-0.2530328108\C,0,-1.2862673  
952,5.2620679732,-0.5405443911\C,0,-3.1564280742,3.7338286864,-0.17062  
06499\H,0,-2.6541747745,1.6629558438,0.286744182\C,0,-2.6726868671,5.0

134630368,-0.4796557242\H,0,-0.9159706356,6.2567583803,-0.8013884694\H,0,-4.2333367344,3.5554203639,-0.1147453887\H,0,-3.3742992706,5.8292972126,-0.6757102991\N,0,0.1681681107,1.9930964735,0.1375889175\C,0,1.9817830203,5.221943011,-0.4702108545\C,0,1.7180934959,6.5024736994,0.0875073361\C,0,3.1609692931,5.0787392405,-1.2478321326\C,0,2.5918454971,7.5764504227,-0.115722113\H,0,0.8347828012,6.634365209,0.7171879055\C,0,4.0300866096,6.1558702066,-1.4519262631\H,0,3.3731407782,4.121105165,-1.7274009019\C,0,3.7533812363,7.4115169366,-0.8868383374\H,0,2.3686469872,8.5465100395,0.3384966863\H,0,4.9248747628,6.0167202864,-2.0659641234\H,0,4.4344746828,8.2518445368,-1.0474409716\C,0,2.550513759,-2.0767117965,3.0188546851\C,0,2.5273082382,-1.7546224567,-3.03390195\C,0,2.5145825866,-3.5686208063,3.4045812794\H,0,3.2441410463,-3.7544602328,4.2113179584\H,0,1.5178722426,-3.8612833472,3.7689321971\C,0,3.9680664433,-1.4127757314,-2.5044007358\H,0,4.663275408,-1.6067785724,-3.3405145341\H,0,4.0041100659,-0.3292148029,-2.3016394678\C,0,2.1779720351,-0.7527040721,-4.1617062189\H,0,2.1597039809,0.2814551025,-3.7872004677\H,0,2.9272508026,-0.8233223779,-4.9680359779\H,0,1.1911576907,-0.978475081,-4.5981540347\C,0,2.213956392,-1.2086705363,4.2557858032\H,0,2.9636268051,-1.3798654862,5.0465436872\H,0,2.2083421239,-0.1375020796,4.0060844207\H,0,1.225474895,-1.4727336236,4.6661646915\C,0,3.9858162771,-1.6770382839,2.5161523447\H,0,4.019230963,-0.5780437589,2.430525355\H,0,4.688881738,-1.9571393281,3.3207119789\C,0,-3.1663345731,-0.994880192,3.0789495656\C,0,-3.1813717121,-0.706453089,-2.9538926703\C,0,-4.5421523204,-1.5507100888,2.5578566557\H,0,-5.262942924,-1.4332781445,3.386452282\C,0,-4.5568739284,-1.3039596027,-2.4805849541\H,0,-5.2811424378,-1.1035884788,-3.290051919\H,0,-4.4422064808,-2.3983496897,-2.4121166931\C,0,-5.0871664763,-0.7741753892,-1.1619949542\C,0,-5.9754455859,0.3172880725,-1.09113121\C,0,-4.6802620172,-1.381180429,0.040883812\C,0,-6.4197869946,0.790254208,0.1529713129\H,0,-6.3316886209,0.7884611387,-2.0126089462\C,0,-5.0804528967,-0.896293455,1.3000921361\H,0,-4.0233451308,-2.2529485743,-0.0053783328\C,0,-5.9679464153,0.1972066283,1.3417072217\H,0,-7.1268780054,1.6242241105,0.1966493095\H,0,-6.3192604953,0.5757729126,2.3068081357\C,0,-2.7000745924,-1.8927055731,4.2533047371\H,0,-1.7488247388,-1.5284366927,4.6751425367\H,0,-3.4547561218,-1.8733340132,5.0574012914\H,0,-2.5596415439,-2.9343954354,3.9279608135\C,0,-3.3095900068,0.4596212797,3.5647872414\H,0,-4.0418750944,0.4987935866,4.3893345852\H,0,-2.3509542211,0.8503856437,3.938267868\H,0,-3.6537153246,1.1292704407,2.7639286785\C,0,-2.7240745596,-1.4939509323,-4.2084641772\H,0,-3.4817181433,-1.3970413358,-5.0042967394\H,0,-1.7730291797,-1.0961694608,-4.5993495627\H,0,-2.5873416143,-2.5621123449,-3.9820715445\C,0,-3.3211798352,0.7871645823,-3.3008559472\H,0,-2.3617898077,1.2090155918,-3.6363646744\H,0,-4.0543251508,0.9053873777,-4.117073112\H,0,-3.6600326005,1.3793437758,-2.4394003659\H,0,-4.4224424467,-2.6325679764,2.3825222877\H,0,2.7625738836,-4.2153230541,2.551075538\C,0,2.4861818764,-3.194528481,-3.5820609601\H,0,3.1984396124,-3.2864925168,-

4.4198399444\H,0,2.7547670388,-3.930812812,-2.811206252\H,0,1.48250942  
65,-3.4494087744,-3.9551819781\C,0,4.4219212645,-2.2909673958,1.199626  
3725\C,0,4.0908054762,-1.6391023509,-0.000406109\C,0,5.1452285774,-3.4  
970547126,1.12022288\C,0,4.4137213569,-2.1630298725,-1.2637683003\H,0,  
3.5600562931,-0.6871505898,0.0479555531\C,0,5.5041941753,-4.0257269044  
, -0.1292632766\H,0,5.4407364129,-4.0170718557,2.0368936782\C,0,5.13785  
40336,-3.3701507004,-1.3148818148\H,0,6.0792868213,-4.9551557029,-0.17  
94380709\H,0,5.4287115169,-3.7913711022,-2.282401125\C,0,1.3500428144,  
2.7466418502,0.159523768\C,0,2.7278113418,2.0787269524,0.118974287\C,0  
,2.0344114358,2.9283853085,2.1185437979\C,0,3.3439618507,2.6996564432,  
1.3884476861\H,0,3.2831664067,2.211145127,-0.8245454271\H,0,2.57028159  
83,1.0046636412,0.2679503506\H,0,1.7923650807,3.9011744651,2.557631155  
8\H,0,1.5629201846,2.0641462092,2.5950621923\H,0,3.8456638225,3.654223  
8812,1.1669162227\H,0,4.0684364758,2.048321363,1.9099185504\\Version=E  
S64L-G09RevD.01\State=3-A\HF=-2778.7657294\S2=2.014943\S2-1=0.\S2A=2.0  
0011\RMSD=8.056e-09\Dipole=0.4083344,-0.0827443,0.0739118\Quadrupole=1  
.9083851,-10.0551513,8.1467662,-2.8918747,-2.9279791,-1.1304801\PG=C01  
[X(C49H55N1O8Rh2)]\@

### **3IN7**

1\1\GINC-A727\FOpt\UBPW91\GenECP\C49H55N1O8Rh2(3)\SIOC001\16-Jun-2016\  
0\#p opt genecp bpw91\\Title Card Required\\0,3\rh,-0.054597605,0.114  
4566914,0.0240074417\rh,0.0820453592,-0.0687138198,2.4308217581\O,1.97  
61310838,0.1545447735,-0.0684515948\C,2.6547760211,0.0586084383,1.0146  
795502\O,2.1558350935,-0.0472171793,2.1983617421\O,0.0274224595,-1.935  
8023802,-0.1000415712\C,0.1047606692,-2.6136729537,0.9879754639\O,0.13  
60195314,-2.1178825148,2.1735918796\O,-2.1016559926,0.0855327561,0.155  
1010194\C,-2.6334667576,-0.0005047453,1.3217331367\O,-1.9874298193,-0.  
0752289379,2.4290329485\O,-0.1208010999,2.1395894361,0.2077344389\C,-0  
.0761999899,2.6667579861,1.3755329717\O,0.0201986656,2.0187144489,2.48  
51986818\C,-0.869365902,-1.0598557402,5.2359552173\C,-0.8407705083,-0.  
7566809677,6.6313424569\C,-1.7195554315,-2.0488619515,4.735952135\C,0.  
1445741406,0.2873044584,6.7961098607\C,-1.7112289723,-1.4173023677,7.5  
167349078\C,-2.5613117018,-2.7282247745,5.6429444271\H,-1.7316405648,-  
2.294480164,3.6762224133\C,-2.5666428109,-2.4121490262,7.0117704306\H,  
-1.7275426048,-1.1588693424,8.5790020375\H,-3.2257536255,-3.5082752166  
,5.2619787248\H,-3.2404388803,-2.9419110449,7.6909908331\N,0.058530766  
3,-0.2397852001,4.5527439943\C,0.5071067805,0.9352425992,8.0613075216\  
C,0.7028199032,0.1650589492,9.2363346653\C,0.6382194387,2.3432412718,8  
.1628050325\C,1.0260806043,0.7766456136,10.4532853591\H,0.6330344906,-  
0.9238569132,9.1745596673\C,0.9556190467,2.9518436154,9.3822292103\H,0  
.4526276457,2.9611162843,7.2808336838\C,1.1533528422,2.1724238754,10.5  
335972824\H,1.1857393564,0.1596828891,11.3424662157\H,1.0402708926,4.0  
411674043,9.4367213771\H,1.4033045729,2.6493092951,11.4854715588\C,4.1  
945883715,0.058000415,0.8880460458\C,-0.1592454096,4.2085951836,1.4585

334744\C, 4.6117101391, 0.057691571, -0.5953738393\H, 5.7128072936, 0.03622  
25158, -0.663978973\H, 4.2180245484, -0.8270295239, -1.1189669259\C, 1.1624  
358666, 4.7756517759, 2.092892326\H, 1.0668944491, 5.8760529018, 2.08610088  
4\H, 1.190193398, 4.4619644829, 3.149905305\C, -1.3400504559, 4.5831554416,  
2.3883947252\H, -1.2237001426, 4.130908172, 3.3845230494\H, -1.3919986025,  
5.6790909435, 2.5018299552\H, -2.2991292202, 4.2425056587, 1.9648251646\C,  
4.7431445533, -1.2085858558, 1.5907327152\H, 5.8447377584, -1.217329695, 1.  
5331376623\H, 4.4469099977, -1.2358114977, 2.6499355576\H, 4.3732043823, -2  
.1238946909, 1.0999180405\C, 4.7832888748, 1.3152674318, 1.6258892848\H, 4.  
6085072199, 1.1802258553, 2.7062751074\H, 5.8764904573, 1.2854929856, 1.470  
4714962\C, 0.1756000613, -4.1504802087, 0.8485023856\C, -4.1768795724, -0.0  
015757324, 1.3870902152\C, -1.0879718422, -4.6518534318, 0.0577848216\H, -1  
.0054992742, -5.7515838954, -0.0027028698\C, -4.7275730188, -1.1879858123,  
0.5142620321\H, -5.8278862116, -1.1611341313, 0.6066597831\H, -4.485761594  
, -0.970741566, -0.5392319032\C, -4.2071537915, -2.5670647581, 0.8722386122  
\C, -4.8866381073, -3.4200714242, 1.7643804442\C, -3.001215319, -3.02024429  
13, 0.3053205033\C, -4.3545779901, -4.6777237031, 2.0871126266\H, -5.841888  
6448, -3.1049842317, 2.1959552142\C, -2.429069622, -4.2597691853, 0.6476937  
139\H, -2.4871234967, -2.3829233077, -0.417886499\C, -3.1291215956, -5.0920  
55668, 1.5434609991\H, -4.9009869808, -5.3418973483, 2.763653665\H, -2.7220  
686886, -6.0742220809, 1.8038287143\C, 1.4338628327, -4.4939682825, 0.01077  
9258\H, 2.3533179262, -4.1869698853, 0.5359051235\H, 1.4856735337, -5.58377  
58666, -0.1509708423\H, 1.4098122199, -3.9938644477, -0.9690230752\C, 0.269  
3362718, -4.832817116, 2.2259643419\H, 0.352411912, -5.9244769642, 2.087953  
2238\H, 1.1552313551, -4.4882685158, 2.7805799928\H, -0.6141037328, -4.6287  
449806, 2.8473663657\C, -4.6790192379, 1.3254890048, 0.7624890057\H, -5.781  
9814243, 1.3362466101, 0.7495690522\H, -4.3409787513, 2.1925491845, 1.35362  
92514\H, -4.3148195198, 1.4447443131, -0.2690858912\C, -4.6731767117, -0.11  
1898695, 2.8405734669\H, -4.2973909345, 0.7213906362, 3.453251622\H, -5.776  
1053168, -0.0792925549, 2.8532518684\H, -4.3464020087, -1.0470380839, 3.316  
4921521\H, -1.0156592897, -4.263639433, -0.9715403903\H, 4.2449453019, 0.95  
04097669, -1.1217785375\C, -0.3841234137, 4.8122316756, 0.0585984051\H, -0.  
4765304531, 5.9084719242, 0.1445176315\H, 0.4492009846, 4.5834760678, -0.62  
10435147\H, -1.3072906592, 4.4243899692, -0.3982099706\C, 4.2292051156, 2.6  
583360109, 1.1902680867\C, 3.0575106199, 3.144363914, 1.795479395\C, 4.8362  
526236, 3.4483864489, 0.1942871049\C, 2.4539774261, 4.355935977, 1.41713982  
14\H, 2.5939571824, 2.5579101368, 2.5898197881\C, 4.2673332704, 4.675088302  
4, -0.1812103484\H, 5.763320855, 3.1102253855, -0.2793281823\C, 3.081462536  
3, 5.126169355, 0.4187464469\H, 4.7551890677, 5.287689934, -0.9453215948\H,  
2.6507175194, 6.0870488158, 0.1197212154\C, 0.6730684251, 0.5409316001, 5.4  
915686687\C, 1.8497096529, 1.4151644339, 5.1511023592\C, 3.646025195, -0.36  
19295577, 5.5578653305\C, 3.1586584814, 1.0112080485, 5.8818408586\H, 1.630  
2327229, 2.4719057934, 5.3810070983\H, 2.013570456, 1.3485385247, 4.0692004  
464\H, 4.6403739981, -0.6817096121, 5.8794315393\H, 2.9741899321, -1.116537  
1276, 5.1450615398\H, 3.0064845831, 1.1180973259, 6.9771033412\H, 3.9380098

361,1.7609097517,5.63586143\\Version=ES64L-G09RevD.01\State=3-A\HF=-27  
78.0452047\S2=2.008405\S2-1=0.\S2A=2.000044\RMSD=3.547e-09\RMSF=2.823e  
-06\Dipole=0.0615771,0.1631777,0.703462\Quadrupole=0.5174345,5.9376986  
,-6.4551331,0.4795661,-1.221704,2.1437227\PG=C01 [X(C49H55N1O8Rh2)]\@

### **<sup>3</sup>TS12**

1\1\GINC-A761\SP\UBPW91\GenECP\C49H55N1O8Rh2(3)\SIOC001\23-Aug-2016\0\  
\#p genecp bpw91 geom=check scrf=(iefpcm,smd,solvent=chlorobenzene)\T  
itle Card Required\\0,3\rh,0,0.7732549174,-2.1641441844,0.9054917918\r  
h,0,0.1066000849,-0.1531678844,-0.3133886462\o,0,-0.3552650762,-3.3036  
490411,-0.3453405851\C,0,-1.0093619082,-2.7492410671,-1.2971088729\o,0  
,-1.0173932951,-1.4854692087,-1.5410915662\o,0,2.35445943,-2.352906304  
5,-0.4059987678\C,0,2.5245150349,-1.4650651697,-1.3166297278\o,0,1.768  
8347986,-0.4429852596,-1.5127288793\o,0,1.8956626374,-1.0402930254,2.1  
9015735\C,0,1.9140105271,0.2365196294,2.025501345\o,0,1.2941401029,0.8  
657671583,1.0995858641\o,0,-0.8318682596,-1.9110562046,2.1439635078\C,  
0,-1.611014266,-0.9108684583,1.9559602138\o,0,-1.4918009798,-0.0300592  
54,1.024326189\C,0,0.5208249512,2.9062725309,-1.0101988657\C,0,-0.1986  
601171,4.1219926273,-0.7816266162\C,0,1.9152555584,2.8868205058,-1.098  
0354605\C,0,-1.6104247986,3.7798476575,-0.8229260952\C,0,0.5146252585,  
5.3162682748,-0.5684576152\C,0,2.6059022989,4.1033935921,-0.9402678809  
\H,0,2.4460887091,1.9511353275,-1.2762154189\C,0,1.9160121879,5.299492  
368,-0.6636986471\H,0,-0.0109676439,6.2456028466,-0.332700607\H,0,3.69  
64007896,4.1105050382,-1.0186350962\H,0,2.47640362,6.2279377089,-0.520  
8451469\N,0,-0.3941152403,1.8397008004,-1.1441213705\C,0,-2.7560518531  
,4.6832876392,-0.7115653204\C,0,-2.7199579012,5.9862194308,-1.27280743  
35\C,0,-3.9468052734,4.282647747,-0.0522839886\C,0,-3.8239371518,6.841  
3019851,-1.1829924425\H,0,-1.8273970047,6.3067285339,-1.8155679646\C,0  
, -5.0495661752,5.1397120875,0.0337298961\H,0,-3.9833253788,3.298079550  
5,0.4217811777\C,0,-4.9957709479,6.4245562716,-0.5306815861\H,0,-3.773  
2928728,7.8367035767,-1.6344802207\H,0,-5.9526618155,4.8076251583,0.55  
46726665\H,0,-5.8571952587,7.0947265607,-0.4612156916\C,0,-1.829028539  
1,-3.6746566374,-2.2255302791\C,0,-2.7899130784,-0.7352124818,2.941213  
92\C,0,-3.3479225263,-3.2787621988,-2.1619025735\H,0,-3.4558430385,-2.  
2768265252,-2.6102078548\H,0,-3.8844015214,-3.9842790646,-2.8210506048  
\C,0,-4.1473605673,-0.8105252533,2.1537783135\H,0,-4.9525233945,-0.700  
8651585,2.9018380834\H,0,-4.2015414738,0.0693435748,1.491158913\C,0,-2  
.6795145458,0.6719987829,3.5797108816\H,0,-3.5315675278,0.8408720379,4  
.2596583208\H,0,-1.7538184652,0.7648114097,4.1710730342\H,0,-2.6778425  
555,1.4609382889,2.8130516076\C,0,-2.7431313301,-1.8132330278,4.041309  
6451\H,0,-1.7989803354,-1.7654216743,4.6047875319\H,0,-3.5746150851,-1  
.6492051268,4.7478555419\H,0,-2.8340618235,-2.82598896,3.6233388541\C,  
0,-1.6399390368,-5.1504773261,-1.8223509598\H,0,-2.2110453604,-5.79387  
62168,-2.5134207616\H,0,-0.5807704464,-5.4448060714,-1.8748479815\H,0,  
-1.9905439467,-5.3412691031,-0.7979664895\C,0,-1.3343943281,-3.4644101

308,-3.6781841632\H,0,-0.2745322653,-3.7506002918,-3.7799924042\H,0,-1  
.9207225281,-4.0951527351,-4.3672132319\H,0,-1.4413456135,-2.414971292  
2,-3.991230613\C,0,3.7309876038,-1.660213671,-2.2631535203\C,0,2.74136  
49106,1.0535088824,3.0429221032\C,0,5.0495464561,-1.7296154895,-1.4093  
872615\H,0,5.8820310126,-1.8536006131,-2.1249360408\C,0,4.2319447181,0  
.5533740862,3.0120555095\H,0,4.7899304606,1.1855897597,3.7255382641\H,  
0,4.250872072,-0.4757318666,3.4077993578\C,0,4.9059922288,0.5776466339  
,1.653799088\C,0,5.6658512015,1.6776513601,1.2098833531\C,0,4.76648951  
36,-0.5264351309,0.7925018515\C,0,6.2483411854,1.6687621576,-0.0664022  
8\H,0,5.8133794188,2.5376268831,1.8705696547\C,0,5.3074541968,-0.53872  
54156,-0.5063832621\H,0,4.2119460027,-1.4005418363,1.1418454087\C,0,6.  
0634254649,0.5744117435,-0.9246574974\H,0,6.8549336977,2.5188750729,-0  
.3930922372\H,0,6.5229627285,0.5778848568,-1.918228125\C,0,3.551240768  
6,-3.0207680784,-2.9838268462\H,0,2.6506593172,-3.0145739321,-3.620040  
8288\H,0,4.4212048204,-3.2159529078,-3.6331510382\H,0,3.4600343277,-3.  
8454853633,-2.2612528547\C,0,3.8133018983,-0.5297713292,-3.3053999248\  
H,0,4.6609311122,-0.7207833665,-3.9852423796\H,0,2.8950731297,-0.47726  
33268,-3.9096868882\H,0,3.9644083859,0.45182118,-2.83411839\C,0,2.1705  
331727,0.7698285532,4.4557206222\H,0,2.7710208987,1.3021123231,5.21264  
09605\H,0,1.1310854856,1.1275847234,4.5392118982\H,0,2.187377784,-0.30  
60262399,4.6855637968\C,0,2.6596170131,2.5607301384,2.7424857737\H,0,1  
.6190901707,2.916999867,2.7769264616\H,0,3.2395611204,3.1157580427,3.4  
998227292\H,0,3.0561908755,2.8056007565,1.7475855349\H,0,5.0072144717,  
-2.6473158523,-0.7999445575\C,0,-2.2269813851,1.2949496287,-3.16672135  
12\C,0,-2.7330728364,1.5629889544,-1.6964455422\H,0,-2.7676568638,0.42  
25779521,-3.5744005111\H,0,-2.4857144728,2.1734709253,-3.7809817356\H,  
0,-2.8540438358,0.6017661116,-1.1758083282\H,0,-3.7056702301,2.0760882  
132,-1.7098962164\C,0,-1.6588573341,2.3883656147,-1.0666160269\C,0,-0.  
7468400309,1.0635135138,-3.1909028701\H,0,-0.0827939876,1.8162282371,-  
3.6212011503\H,0,-0.3545369361,0.0493067462,-3.1395791169\C,0,-3.97184  
44415,-3.2767018416,-0.7794574291\C,0,-3.8553449348,-2.1293879128,0.02  
41516694\C,0,-4.6660429341,-4.3856330474,-0.2578192929\C,0,-4.36445107  
07,-2.0672279381,1.3330555917\H,0,-3.3428759195,-1.2551008398,-0.38214  
71057\C,0,-5.2086592679,-4.3362512001,1.0353065399\H,0,-4.7945601594,-  
5.2843735943,-0.8692674893\C,0,-5.0552509923,-3.1898735165,1.829674605  
5\H,0,-5.7592419095,-5.1972852012,1.4258258633\H,0,-5.4859964384,-3.16  
25587705,2.835588242\\Version=ES64L-G09RevD.01\State=3-A\HF=-2778.7431  
797\S2=2.013285\S2-1=0.\S2A=2.000068\RMSD=6.462e-09\Dipole=-0.5252704,  
-0.7662351,-0.7699549\Quadrupole=2.432244,-8.8122739,6.3800299,3.44592  
76,-5.3949062,10.7645096\PG=C01 [X(C49H55N1O8Rh2)]\@

### **<sup>3</sup>TS13**

1\1\GINC-SHI\_02\SP\UBPW91\GenECP\C49H55N1O8Rh2(3)\YIN\09-Jul-2016\0\#\n  
p genecp bpw91 geom=check scrf=(iefpcm,smd,solvent=chlorobenzene)\Tit  
le Card Required\0,3\rh,0,0.8045921239,-2.2623109796,0.2180577676\rh,

0,0.0786509878,0.019826457,-0.0574610224\O,0,-0.4688705675,-2.83253091  
72,-1.2749332958\C,0,-1.2173279301,-1.9589102251,-1.844323703\O,0,-1.2  
431149579,-0.7044077067,-1.5704573556\O,0,2.3080332018,-2.1072397055,-  
1.1517821588\C,0,2.5242295568,-0.9946721589,-1.7832118664\O,0,1.843565  
9985,0.0583405243,-1.6323147474\O,0,2.0538027975,-1.652636607,1.739324  
7409\C,0,2.1173521488,-0.3972976075,2.021751249\O,0,1.4421732381,0.527  
2811686,1.4519631369\O,0,-0.6113550957,-2.7133813329,1.5911423544\C,0,  
-1.4627129429,-1.8353504998,2.0137205891\O,0,-1.4985344393,-0.62676818  
37,1.6399048717\C,0,0.4520579073,3.1338095112,-0.370447286\C,0,-0.2299  
4017,4.4011688868,-0.4094575564\C,0,1.8622614168,3.0797907971,-0.45698  
78221\C,0,-1.6253557763,4.1119149966,-0.3055308912\C,0,0.5033551136,5.  
6131740796,-0.4673965698\C,0,2.555231054,4.2846292497,-0.5305919954\H,  
0,2.3723257674,2.117816528,-0.4709980472\C,0,1.8896690908,5.5430053044  
, -0.5236526965\H,0,-0.0114470243,6.5772384692,-0.4545807736\H,0,3.6473  
216763,4.2641850409,-0.5879490803\H,0,2.4801088993,6.4622356218,-0.565  
6261136\N,0,-0.4425363937,2.0856372763,-0.2746914856\C,0,-2.6967312919  
,5.0876037205,-0.0241611101\C,0,-2.8437337479,6.2522565062,-0.81370409  
87\C,0,-3.5612928782,4.9054044523,1.0794991932\C,0,-3.8310022737,7.199  
0352724,-0.512683458\H,0,-2.1867746245,6.4043732445,-1.6746998683\C,0,  
-4.5428443441,5.8578353743,1.3816177187\H,0,-3.4397439761,4.0283992722  
,1.7196695253\C,0,-4.6836737269,7.0047431304,0.5853110197\H,0,-3.93517  
41017,8.0902919764,-1.1377395281\H,0,-5.1964169907,5.7053415468,2.2449  
198351\H,0,-5.452687436,7.7455993064,0.8204526784\C,0,-2.1552939881,-2  
.4669209183,-2.9655750303\C,0,-2.4962718137,-2.335852328,3.0564366336\  
C,0,-1.9305822504,-3.9674540604,-3.232684076\H,0,-2.5912177513,-4.2980  
903318,-4.0528418088\H,0,-0.8890589677,-4.1642174923,-3.5287314671\C,0  
, -3.9406193268,-2.103181588,2.4878823751\H,0,-4.6504068976,-2.42366232  
2,3.2715689429\H,0,-4.0735999088,-1.0161752531,2.3557259005\C,0,-2.337  
4179099,-1.4694071102,4.3301294628\H,0,-2.4593329291,-0.4002495248,4.0  
985060106\H,0,-3.0926255962,-1.7572345134,5.0815159633\H,0,-1.34135951  
43,-1.6126830048,4.7804938522\C,0,-1.8515674822,-1.6580337214,-4.25100  
93598\H,0,-2.524010331,-1.9786117462,-5.0649148208\H,0,-1.9889217087,-  
0.57856399,-4.0869912188\H,0,-0.8140250659,-1.8239763716,-4.5846713587  
\C,0,-3.6480801668,-2.1974389632,-2.5594882763\H,0,-3.7809456512,-1.10  
506278,-2.4802811386\H,0,-4.272335945,-2.5352599378,-3.4062786346\C,0,  
3.7013997501,-1.0203328352,-2.7921883705\C,0,3.0760906435,0.0016067222  
,3.1673879901\C,0,5.0201478566,-1.4484610615,-2.0550445994\H,0,5.83117  
30459,-1.4146139518,-2.8050442487\C,0,4.5030189263,-0.5935571278,2.892  
2640918\H,0,5.1459031415,-0.2771070209,3.7333427757\H,0,4.4232072755,-  
1.691825607,2.9418575583\C,0,5.142239873,-0.1994003072,1.5736020769\C,  
0,5.997175294,0.9147102578,1.456270177\C,0,4.8798904697,-0.9612063441,  
0.41963744\C,0,6.5513992617,1.2561048547,0.2133847007\H,0,6.2426710579  
,1.5068312852,2.3437817812\C,0,5.3974820134,-0.6169034812,-0.842964212  
2\H,0,4.2418552483,-1.8434266654,0.5049699853\C,0,6.2488217372,0.50269  
20311,-0.9310026362\H,0,7.2301399313,2.1113395214,0.1373782152\H,0,6.6

895857934,0.7756074852,-1.8952775519\C,0,3.3862525565,-2.0846592689,-3  
.8725580016\H,0,2.4762269825,-1.816525306,-4.4348741067\H,0,4.22018061  
43,-2.1508624978,-4.5924252342\H,0,3.2328994703,-3.0761026598,-3.42034  
99193\C,0,3.8690684386,0.3586051516,-3.4563026491\H,0,4.6838906857,0.3  
172383873,-4.1998311444\H,0,2.9453617095,0.6621349907,-3.9719992496\H,  
0,4.1110513912,1.1373423591,-2.7185941341\C,0,2.5334329796,-0.63408157  
24,4.4733760047\H,0,3.2096608445,-0.4003847541,5.313358473\H,0,1.53602  
54727,-0.2341645113,4.7201526168\H,0,2.4553000909,-1.7280367759,4.3802  
735458\C,0,3.1386073037,1.532214273,3.3242409719\H,0,2.1420692722,1.94  
94133781,3.5327273302\H,0,3.8049442214,1.789334489,4.1656633602\H,0,3.  
5219729561,2.0185479501,2.4157470381\H,0,4.9070224533,-2.5013782341,-1  
.7483560973\H,0,-2.1482931847,-4.5753787129,-2.3432322692\C,0,-2.27975  
69236,-3.8201569082,3.4034733559\H,0,-3.0178069,-4.1367549419,4.161288  
4157\H,0,-2.3903565514,-4.4638319093,2.5189849724\H,0,-1.2726005864,-3  
.9858612391,3.8154741365\C,0,-4.1219621739,-2.8562267243,-1.2768112758  
\C,0,-3.8762578932,-2.2349063414,-0.0390888516\C,0,-4.8130326304,-4.08  
38061486,-1.2791790095\C,0,-4.2633778833,-2.8106351969,1.1849231287\H,  
0,-3.3595697782,-1.2732113853,-0.0229915739\C,0,-5.226867776,-4.666948  
821,-0.0725085022\H,0,-5.0370179468,-4.5790924249,-2.2294753761\C,0,-4  
.9512702646,-4.0392559463,1.1513834589\H,0,-5.7726604264,-5.6152313387  
, -0.0862827413\H,0,-5.2833203807,-4.5005627036,2.087025496\C,0,-2.3879  
760035,3.0173874044,-2.0390955227\C,0,-1.7047774611,2.6392313808,-0.30  
24980087\C,0,-2.9839066141,1.8174058329,-0.2022070173\C,0,-3.663897305  
,2.4049531261,-1.4621227494\H,0,-3.5288252684,1.9195519084,0.747571653  
\H,0,-2.7167340409,0.7628275845,-0.3372920563\H,0,-2.4373675439,3.9995  
929422,-2.5232184181\H,0,-1.71855743,2.3303254005,-2.5697350726\H,0,-4  
.4044767232,3.1807301612,-1.2204576777\H,0,-4.1388431571,1.6653910145,  
-2.1262965734\\Version=EM64L-G09RevA.01\State=3-A\HF=-2778.7693889\S2=  
2.005802\S2-1=0.\S2A=2.000017\RMSD=2.120e-09\Dipole=-2.3607786,3.32802  
15,-0.8611266\Quadrupole=-3.7622586,4.7157417,-0.9534831,-10.9342337,0  
.776568,-3.0491552\PG=C01 [X(C49H55N1O8Rh2)]\@

### P3

1\1\GINC-SHI\_02\SP\RBPW91\GenECP\C49H55N1O8Rh2\YIN\21-Jun-2016\0\#\#p g  
enecp bpw91 geom=check scrf=(iefpcm,smd,solvent=chlorobenzene)\Title  
Card Required\0,1\Rh,0,0.0269375683,0.0061428829,0.0549250855\Rh,0,-0  
.0021365262,-0.0479253903,2.4574364268\O,0,2.0685200307,0.0031140116,0  
.1068459267\C,0,2.66019496,-0.0430516799,1.2450804236\O,0,2.0749022833  
, -0.0848197066,2.3921114981\O,0,0.0471051274,-2.0502858553,0.044153482  
5\C,0,0.0206155535,-2.6755538377,1.1655744406\O,0,-0.0065222566,-2.123  
089167,2.3264129483\O,0,-2.0333097371,0.0274890345,0.0797029952\C,0,-2  
.6408764768,-0.01125874,1.2103520791\O,0,-2.0697622107,-0.0460888561,2  
.3629361499\O,0,0.0293856031,2.0437232136,0.1215009558\C,0,0.033276238  
7,2.6214646352,1.2681720165\O,0,0.0106779383,2.0200268671,2.4060925669  
\C,0,-0.6498180114,1.168176025,5.3784374358\C,0,0.4696298007,1.7700895



462,6.0206755294\C,0,-1.8673186474,1.8290007236,5.2094751783\C,0,1.522  
5969612,0.753910623,6.1196670324\C,0,0.3692800824,3.1111728858,6.43751  
11153\C,0,-1.9620340795,3.1462627706,5.6864370817\H,0,-2.7051831932,1.  
3394518799,4.7105975007\C,0,-0.8511182618,3.7833129219,6.2758200646\H,  
0,1.2235851268,3.6208902004,6.8896391667\H,0,-2.9076588334,3.686649383  
8,5.5881205077\H,0,-0.942556202,4.8187902783,6.616059821\N,0,-0.279779  
5745,-0.1444809972,4.9828216164\C,0,2.8171561343,0.8612638403,6.811056  
3651\C,0,2.9475882966,1.6066438192,8.007222573\C,0,3.9592438707,0.1831  
67205,6.3241488033\C,0,4.1717370817,1.6727138759,8.6839745147\H,0,2.07  
12510664,2.1087784232,8.424095631\C,0,5.1808754942,0.2445209666,7.0067  
911303\H,0,3.8821764873,-0.3765524129,5.3884245931\C,0,5.2950763979,0.  
9924876405,8.1885815967\H,0,4.2454450271,2.2512721127,9.6096687743\H,0  
,6.0506231059,-0.2856314883,6.6073488175\H,0,6.2505970432,1.0463418053  
,8.7178164608\C,0,4.2057426886,-0.0801027473,1.2449994565\C,0,0.038973  
3255,4.1663655603,1.2876265774\C,0,4.7547719331,0.0174403091,-0.191055  
0427\H,0,5.8567251457,-0.0361710806,-0.1659729424\H,0,4.3838560973,-0.  
809546577,-0.8152703872\C,0,1.2210715595,4.6788705453,2.1857044402\H,0  
,1.1596893116,5.7818931245,2.1877107887\H,0,1.0325838553,4.340135403,3  
.21721289\C,0,-1.2926067541,4.6343643912,1.9282088265\H,0,-1.409815538  
5,4.2289795137,2.9440654584\H,0,-1.3113634131,5.7361953961,1.982906996  
7\H,0,-2.154447458,4.313276312,1.3195230161\C,0,4.6482569804,-1.423857  
5079,1.8782324533\H,0,5.7493770685,-1.4712586633,1.9244604162\H,0,4.25  
08010898,-1.5345074281,2.8985030694\H,0,4.2992730698,-2.2787192771,1.2  
755895249\C,0,4.7634729279,1.0884299077,2.13434925\H,0,4.4527123331,0.  
9038134224,3.175475026\H,0,5.8650187467,1.0081913497,2.1061681808\C,0,  
0.0449434659,-4.2201928062,1.0883186284\C,0,-4.1860329256,0.013151792,  
1.1586660095\C,0,-1.131663579,-4.7154835248,0.1722275205\H,0,-1.065858  
5989,-5.8177035034,0.1404511152\C,0,-4.6967736821,-1.1492656963,0.2327  
794921\H,0,-5.7993979402,-1.0835646688,0.2211140203\H,0,-4.3487717845,  
-0.9396847503,-0.7918755159\C,0,-4.2620818127,-2.5448707252,0.63692737  
37\C,0,-5.0579200165,-3.3743479129,1.4517274595\C,0,-3.0156145726,-3.0  
339411612,0.2045682305\C,0,-4.6004477157,-4.6450035121,1.8318407396\H,  
0,-6.044587015,-3.0301348886,1.7782073426\C,0,-2.5204042951,-4.2876330  
812,0.607552319\H,0,-2.4064043199,-2.414837217,-0.4574386142\C,0,-3.33  
64812403,-5.0965639665,1.4231239346\H,0,-5.2343710713,-5.2888569058,2.  
4490504059\H,0,-2.987900974,-6.0888572218,1.7271374414\C,0,1.381755440  
2,-4.6369265324,0.4227879735\H,0,2.2418344616,-4.3355272439,1.04351274  
44\H,0,1.4166979558,-5.7335147807,0.3076765833\H,0,1.4923704184,-4.175  
8676558,-0.5701452375\C,0,-0.0543833472,-4.8550350673,2.486922211\H,0,  
.9388041669,-4.3493049408,-0.8493305599\C,0,-1.1317300833,-1.360644034  
6,5.1948718852\C,0,1.2859359017,-1.8509548422,5.5182578128\H,0,-1.6122  
042296,-1.6500319832,4.2529472178\H,0,-1.9147876055,-1.1151179376,5.93  
02180888\H,0,1.7013613283,-2.1787705526,4.5500697072\H,0,1.9913358636,  
-2.1427943247,6.3104967412\C,0,1.0151157987,-0.3799969574,5.5214567224  
\H,0,4.4636462573,0.9610654269,-0.6741081728\C,0,0.1523915534,4.729156

3617,-0.1422977371\H,0,0.1368777637,5.8319112424,-0.1028970277\H,0,1.0  
837077834,4.4121481601,-0.6332785626\H,0,-0.6889742302,4.3955492964,-0  
.7682450506\C,0,4.3328779587,2.482393938,1.7211252896\C,0,3.095827382,  
2.9853944982,2.164265811\C,0,5.1240707002,3.2934270635,0.8842744352\C,  
0,2.6043985846,4.2362871903,1.7484356361\H,0,2.4919375368,2.3815984344  
,2.8450410471\C,0,4.6716759683,4.562398424,0.4934741956\H,0,6.10179713  
98,2.9347599181,0.5464836117\C,0,3.4163608821,5.0277772493,0.912083962  
7\H,0,5.3007246969,5.1918497948,-0.1432825749\H,0,3.0683936449,6.01615  
60824,0.5950255234\C,0,-0.1430981681,-2.43656666,5.7296729369\H,0,-0.2  
773324664,-3.398234701,5.2154497509\H,0,-0.3176692324,-2.6009050076,6.  
8050663092\\Version=EM64L-G09RevA.01\State=1-A\HF=-2778.8602791\RMSD=7  
.479e-10\Dipole=-0.4055816,-1.1114482,0.9276803\Quadrupole=9.2626017,7  
.1957437,-16.4583455,-9.7301567,-2.6959473,-4.8493894\PG=C01 [X(C49H55  
N1O8Rh2)]\@

#### P4

1\1\GINC-A751\SP\RBPW91\GenECP\C49H55N1O8Rh2\SIOC001\17-Jun-2016\0\#\#p  
genecp bpw91 scrf=(iefpcm,smd,solvent=chlorobenzene) geom=check scf=(  
maxcyc=256)\Title Card Required\0,1\Rh,0,-0.001719269,0.0436226927,0  
.0609636659\Rh,0,0.1242194139,-0.1093420729,2.4738197342\O,0,2.0389112  
665,0.003573004,-0.0190249549\C,0,2.7064088955,-0.1013617783,1.0685762  
247\O,0,2.2066087799,-0.1740905925,2.2546631284\O,0,-0.0130520669,-2.0  
155192843,-0.0296920554\C,0,0.0407231103,-2.6749995742,1.0706427095\O,  
0,0.0978116326,-2.1655689492,2.2494293745\O,0,-2.0543528953,0.10189918  
4,0.2135810094\C,0,-2.5844064016,0.0475371692,1.3806420572\O,0,-1.9439  
212664,-0.0433014995,2.4913762637\O,0,0.0253574249,2.0796846642,0.2339  
09849\C,0,0.1104860717,2.6156110217,1.3936968292\O,0,0.1704819331,1.98  
03127929,2.5148149114\C,0,-0.7624223108,-1.0829923635,5.4183092525\C,0  
, -0.5542154944,-0.8858288131,6.8055256763\C,0,-1.6574462762,-2.0452616  
668,4.9424053503\C,0,0.4296682899,0.2589408216,6.9562139463\C,0,-1.269  
074866,-1.6369266809,7.738582646\C,0,-2.3552101212,-2.8123481011,5.892  
0629761\H,0,-1.8029849016,-2.1911028434,3.8736149107\C,0,-2.1664457088  
, -2.615073103,7.2701705144\H,0,-1.1368083468,-1.4732954142,8.811850691  
\H,0,-3.0605118453,-3.5719822825,5.5446152615\H,0,-2.7222397794,-3.225  
5776993,7.9874496467\N,0,0.0909967157,-0.2191673819,4.6427187663\C,0,-  
0.2233464642,1.4628040144,7.6641106418\C,0,-0.119369939,1.6316349864,9  
.0584891026\C,0,-0.9995229662,2.3859519978,6.933999162\C,0,-0.76359748  
55,2.6984074488,9.7034337316\H,0,0.4638852614,0.926079239,9.656691685\  
C,0,-1.6407356211,3.4537297567,7.5771323957\H,0,-1.1075481618,2.265361  
9797,5.8519670103\C,0,-1.5237317727,3.6165725346,8.965347825\H,0,-0.66  
82697516,2.8095135171,10.7875495526\H,0,-2.2344126579,4.1595310944,6.9  
889141207\H,0,-2.0223082967,4.4501125435,9.4678644661\C,0,4.2483244657  
, -0.1656166384,0.951822664\C,0,0.1233866178,4.1622192804,1.4564225522\  
C,0,4.6834371739,-0.1127089884,-0.5251326193\H,0,5.7830604675,-0.18337  
53058,-0.5868259192\H,0,4.2520862454,-0.9497932343,-1.0946079527\C,0,1

.4253144281,4.6535355864,2.1836612539\H,0,1.384915796,5.7574994306,2.1  
956429489\H,0,1.3710485385,4.3195299203,3.233439003\C,0,-1.0981499527,  
4.6203422348,2.2922338136\H,0,-1.0756545647,4.1860313332,3.3030716786\  
H,0,-1.1002129215,5.7199308548,2.3818970936\H,0,-2.0417631945,4.320108  
0317,1.8075467825\C,0,4.7251556462,-1.4943965122,1.5899812168\H,0,5.82  
64043832,-1.5524409148,1.5573778082\H,0,4.3998786698,-1.5740344561,2.6  
383097217\H,0,4.3254817258,-2.3608009081,1.0379421725\C,0,4.8919392448  
,1.0196480461,1.7569772091\H,0,4.68160081,0.8540165464,2.827201211\H,0  
,5.9857873479,0.9329132057,1.6288131423\C,0,0.048703538,-4.2179711002,  
0.9597947448\C,0,-4.1284123908,0.1096464182,1.4450702976\C,0,-1.236504  
4561,-4.6845195093,0.184205952\H,0,-1.2001076555,-5.7879000496,0.14408  
4871\C,0,-4.7280126863,-1.0660404972,0.591161091\H,0,-5.8267846705,-0.  
9937938648,0.680164647\H,0,-4.4744846625,-0.8757643803,-0.4647846339\C  
,0,-4.2644410564,-2.4594445235,0.9710585521\C,0,-4.9757858257,-3.26896  
49416,1.8787084106\C,0,-3.0783404077,-2.9701934515,0.4110908601\C,0,-4  
.4953367321,-4.5420636947,2.2213389798\H,0,-5.9166180065,-2.9077582376  
,2.3060880008\C,0,-2.5582715823,-4.2274641737,0.7711202455\H,0,-2.5375  
971093,-2.3658773484,-0.320886125\C,0,-3.2903741598,-5.0161682166,1.68  
06200499\H,0,-5.0674709055,-5.1718413211,2.909634257\H,0,-2.9242260354  
, -6.0110245268,1.9538334908\C,0,1.2880756184,-4.6299818815,0.125455164  
5\H,0,2.2213029769,-4.3544771482,0.6440560359\H,0,1.2943539564,-5.7234  
87219,-0.0209010109\H,0,1.2833125694,-4.1431009461,-0.8613027564\C,0,0  
.1194218379,-4.8751130389,2.3503867235\H,0,0.1496203668,-5.9725693297,  
2.2378716498\H,0,1.024164752,-4.5596342218,2.8917616973\H,0,-0.7490096  
876,-4.6137095103,2.9714543041\C,0,-4.5778109431,1.4454108245,0.800269  
6356\H,0,-5.679573494,1.4995014857,0.7805288362\H,0,-4.2083457348,2.30  
61858665,1.3818339731\H,0,-4.202354884,1.536356609,-0.230034803\C,0,-4  
.6296016766,0.0428016955,2.8993215579\H,0,-4.2286810162,0.8772251084,3  
.4946196869\H,0,-5.7311524479,0.1093218758,2.911670248\H,0,-4.33168691  
62,-0.8924748365,3.3938482067\H,0,-1.1529942493,-4.3186640482,-0.85236  
20204\H,0,4.3647731249,0.8215955412,-1.0090831307\C,0,0.0371772276,4.7  
637738104,0.0405530104\H,0,0.0243147878,5.865140469,0.1106231421\H,0,0  
.8927788298,4.4630551862,-0.5808430593\H,0,-0.8806499407,4.4401666376,  
-0.4729267464\C,0,4.4307195,2.4110570231,1.3666976391\C,0,3.2505631573  
,2.9286614703,1.9293505202\C,0,5.137253034,3.2127439465,0.449221978\C,  
0,2.7351031609,4.1881958128,1.5760437786\H,0,2.7078619374,2.3262489492  
,2.6594384143\C,0,4.6573600163,4.4852974213,0.1041595702\H,0,6.0714247  
45,2.8449215507,0.012986117\C,0,3.4619399394,4.9694962788,0.6567108089  
\H,0,5.2212060228,5.1059523777,-0.5987211049\H,0,3.0976295532,5.964334  
4741,0.3811137177\C,0,0.7514888053,0.5254520064,5.4891596342\C,0,2.029  
8173445,1.2918856411,5.3228870184\C,0,1.8900656979,-0.0153135036,7.431  
2348755\C,0,2.717372857,1.0910525424,6.7144751145\H,0,1.8506703269,2.3  
564127182,5.09990355\H,0,2.6039659408,0.8726590568,4.4844465678\H,0,2.  
0099218927,0.0006926032,8.5249650613\H,0,2.1926980329,-1.0162063397,7.  
0787884782\H,0,2.6739213569,2.0242836065,7.2981692222\H,0,3.7780253469

,0.8128157323,6.6168131748\\Version=ES64L-G09RevD.01\State=1-A\HF=-277  
8.8621247\RMSD=2.749e-09\Dipole=0.5092698,0.3046792,2.4216844\Quadrupo  
le=0.1469129,1.9761988,-2.1231116,-6.7964798,0.3245347,1.4136773\PG=C0  
1 [X(C49H55N1O8Rh2)]\@

#### 4a

1\1\GINC-SHI\_02\SP\RBPW91\6-311++G(d,p)\C17H15N1\YIN\21-Sep-2016\0\#\p  
bpw91/6-311++G(d,p) scrf=(iefpcm,smd,solvent=chlorobenzene)\Title Ca  
rd Required\\0,1\C\C,1,1.4364019\C,2,1.41158657,1,118.18056459\C,3,1.3  
9778598,2,119.31413689,1,-1.76280584,0\C,4,1.41468014,3,121.32760942,2  
,0.58468311,0\C,5,1.39834096,4,121.01260958,3,0.68193254,0\C,2,2.26666  
55,1,71.59446489,6,179.49373343,0\C,7,1.39170628,2,38.24900099,1,179.4  
7612013,0\H,3,1.09315819,2,120.34572289,1,177.84225405,0\H,4,1.0937639  
5,3,119.40923885,2,-179.66054808,0\H,5,1.09357528,4,119.59092528,3,-17  
9.70397533,0\H,6,1.09351892,5,121.17884549,4,179.18866748,0\C,8,1.4734  
1499,7,127.13588256,2,-179.03972315,0\C,13,1.41492672,8,120.87179036,7  
,138.03034769,0\C,13,1.41425473,8,121.36701716,7,-41.54836489,0\C,14,1  
.40059911,13,121.05847391,8,-179.62282387,0\H,14,1.0931595,13,119.1111  
6666,8,-1.25785379,0\C,15,1.40026065,13,121.15694284,8,179.06905283,0\  
H,15,1.09371256,13,119.13286756,8,-2.68017546,0\C,16,1.40298022,14,120  
.40593304,13,0.42996557,0\H,16,1.09429674,14,119.54322934,13,179.77776  
965,0\H,18,1.09435444,15,119.60333634,13,179.80018351,0\H,20,1.0937271  
7,16,120.36988764,14,179.8666485,0\N,1,1.38166328,6,130.80774948,5,177  
.88301082,0\C,24,1.45853465,1,135.25988543,6,10.22547922,0\C,7,1.50622  
734,2,174.98681364,1,98.38467393,0\H,26,1.10629884,7,110.44256922,2,5.  
84656068,0\H,26,1.10018648,7,113.91238339,2,125.90216479,0\H,25,1.1064  
5427,24,110.58286813,1,68.40843746,0\H,25,1.10202379,24,111.32353124,1  
, -51.7730293,0\C,25,1.55166345,24,101.71178203,1,-172.30665804,0\H,31,  
1.10185186,25,109.2340842,24,91.16132857,0\H,31,1.10004778,25,112.0940  
057,24,-149.42362921,0\\Version=EM64L-G09RevA.01\State=1-A\HF=-711.714  
235\RMSD=5.843e-09\Dipole=-1.232575,-0.0426347,-1.3621363\Quadrupole=-  
0.5005682,-7.9347552,8.4353235,-3.0752705,3.908041,-0.9305575\PG=C01 [X  
(C17H15N1)]\@

#### 4a'

1\1\GINC-A719\SP\RBPW91\6-311++G(d,p)\C17H15N1\SIOC001\21-Sep-2016\0\#\p  
bpw91/6-311++G(d,p) scrf=(iefpcm,smd,solvent=chlorobenzene)\Title  
Card Required\\0,1\C\C,1,1.42143838\C,2,1.39382204,1,120.33373499\C,3,  
1.40925283,2,118.59213651,1,-1.6402718,0\C,4,1.40516172,3,120.83217473  
,2,1.0696479,0\C,1,1.39881142,2,121.22957124,3,1.37239241,0\C,1,2.1720  
6951,6,161.25163271,5,178.90749335,0\C,2,1.52023308,1,106.56691798,6,1  
77.77556729,0\H,3,1.09405758,2,121.11217407,1,178.41448136,0\H,4,1.093  
70884,3,119.52816504,2,-178.94401013,0\H,5,1.09385311,4,119.53981245,3  
,179.65767418,0\H,6,1.09280103,1,120.33026956,2,179.58415352,0\N,7,1.2  
9785648,1,39.28408637,6,4.89904156,0\C,8,1.53662925,2,111.61594247,1,-

118.11681609,0\C,14,1.40990275,8,120.28102076,2,81.50264743,0\C,14,1.4  
0831057,8,121.45217767,2,-95.29165463,0\C,15,1.40109755,14,120.9916169  
6,8,-177.54446906,0\H,15,1.09415311,14,119.35112457,8,2.10318893,0\C,1  
6,1.40293177,14,120.91394891,8,177.39608627,0\H,16,1.09360838,14,120.1  
3330913,8,-2.24363009,0\C,19,1.40160463,16,120.30151363,14,-0.04752768  
,0\H,17,1.09395036,15,119.59256508,14,-179.76021419,0\H,19,1.09405309,  
16,119.54489456,14,179.99680288,0\H,21,1.0936349,19,120.30635868,16,17  
9.78820521,0\C,7,1.50576138,1,162.50902894,6,61.28674838,0\C,25,1.5660  
8182,7,101.94624571,1,96.1549141,0\C,26,1.55877037,25,105.62611108,7,-  
9.21683405,0\H,25,1.10081007,7,110.37959919,1,-24.73525362,0\H,25,1.10  
371641,7,112.25480201,1,-144.3710529,0\H,26,1.10108202,25,112.2762456,  
7,-131.25109714,0\H,26,1.10158116,25,110.17395991,7,109.2255306,0\H,27  
,1.10327253,26,110.47055176,25,-81.69454977,0\H,27,1.10065617,26,112.7  
0803224,25,158.20962979,0\\Version=ES64L-G09RevD.01\State=1-A\HF=-711.  
6841274\RMSD=2.747e-09\Dipole=-0.4914603,-0.1036477,1.2960995\Quadrupo  
le=2.356139,0.1228257,-2.4789647,0.187547,-0.6520463,-1.6810788\PG=C01  
[X(C17H15N1)]\@

**The total energies, enthalpies and free energies of the lowest conformers of all species shown in Scheme 7 and archive entries**

Table S5<sup>a</sup>

|              | $E_{\text{tot}} (E_h)$ | $H_{298, \text{PhCl}}$ | $G_{298, \text{PhCl}}$ | # of imaginary frequencies       |
|--------------|------------------------|------------------------|------------------------|----------------------------------|
| <b>IN6-1</b> | -711.6417315           | -711.3602042           | -711.4166402           | 0                                |
| <b>TS8-1</b> | -711.5831475           | -711.3054956           | -711.3649336           | 1<br>(-407.98-cm <sup>-1</sup> ) |
| <b>TS9-1</b> | -711.6240879           | -711.3443268           | -711.3994988           | 1<br>(-493.00 cm <sup>-1</sup> ) |

**IN6-1**

```
1\1\GINC-SHI_02\SP\RBPW91\6-311++G(d,p)\C17H15N1\YIN\31-May-2016\0\#\#p
bpw91/6-311++g(d,p) geom=check scrf=(iefpcm,smd,solvent=ChloroBenzene)
)\TitleCard Required\0,1\C,0,-0.027367827,0.0362724751,0.0327316552
\C,0,0.0109962128,0.0390684129,1.510982545\C,0,1.2133908847,0.00464190
25,-0.7054155649\C,0,-1.3080667829,0.057110907,1.9374156562\C,0,1.2742
420086,-0.0121303971,2.1948910548\C,0,2.3920324028,-0.0285147358,-0.00
33193112\H,0,1.1858897029,0.0045965991,-1.797755002\C,0,2.4258489428,-
0.0439803789,1.4452117178\H,0,1.3114953143,-0.0414817743,3.28731888\H,
0,3.3442326904,-0.0543181017,-0.5420716658\H,0,3.398862736,-0.09208021
28,1.9424912381\N,0,-1.2456105685,0.0676376966,-0.4702994037\C,0,-1.76
68167565,0.1715009088,3.3310315009\C,0,-1.169421694,1.1315808768,4.187
1287556\C,0,-2.7846197681,-0.6505199021,3.8738286754\C,0,-1.5713696596
,1.2626150444,5.5216234688\H,0,-0.4029976088,1.7966349437,3.780743921\
C,0,-3.1812045084,-0.5208830054,5.2103158557\H,0,-3.2447407903,-1.4211
138684,3.2523847711\C,0,-2.5792394643,0.4363126302,6.0409359296\H,0,-1
.0999674141,2.0188736462,6.156123275\H,0,-3.9616842425,-1.1771017717,5
.6064338086\H,0,-2.8942418961,0.5380606234,7.0831807051\C,0,-3.2219637
875,1.2633102774,0.6309590222\C,0,-3.3813547906,-0.890534131,0.5230463
933\H,0,-3.2597087188,1.6660867575,-0.3905653088\H,0,-3.0637201676,2.0
811414211,1.3488794613\H,0,-3.466048899,-1.1588365099,-0.5396740613\H,
0,-3.3575371057,-1.8129865583,1.1219193255\C,0,-2.147827559,0.08895244
99,0.666906918\C,0,-4.3552203978,0.2466701962,0.9185917605\H,0,-5.2760
70406,0.3440589538,0.3232788785\H,0,-4.6259807142,0.2198185822,1.98460
99433\Version=EM64L-G09RevA.01\State=1-A\HF=-711.6417315\RMSD=4.140e-
09\Dipole=-0.1349024,0.0696731,1.3716397\Quadrupole=7.0728851,-4.16235
66,-2.9105284,2.7773479,-2.0945827,1.0662865\PG=C01 [X(C17H15N1)]\@
```

**TS8-1**

```
1\1\GINC-SHI_02\SP\RBPW91\6-311++G(d,p)\C17H15N1\YIN\31-May-2016\0\#\#p
bpw91/6-311++g(d,p) geom=check scrf=(iefpcm,smd,solvent=ChloroBenzene
```

)\\Title Card Required\\0,1\C,0,2.1760464129,-0.455587325,-0.497570120  
6\C,0,0.8918723775,-1.1019348963,-0.2407870025\C,0,3.3614961203,-1.227  
1231603,-0.4922702239\C,0,-0.0651611386,-0.0617719882,-0.2809349757\C,  
0,0.8237844571,-2.5103541526,-0.0484258991\C,0,3.2621340207,-2.5970457  
392,-0.2647867076\H,0,4.3259760465,-0.7464709327,-0.6759263772\C,0,2.0  
036758045,-3.239693722,-0.0508014845\H,0,-0.1413922167,-3.0083003263,0  
.0836862414\H,0,4.1706415685,-3.2074566553,-0.2622225936\H,0,1.9776173  
756,-4.3225630015,0.0990957879\N,0,2.0531773958,0.8916575046,-0.710348  
0455\C,0,-1.5120538737,-0.1548940177,-0.0993896468\C,0,-2.0586490407,-  
0.9547534118,0.9387727328\C,0,-2.41865908,0.5417615007,-0.9409786278\C  
,0,-3.4406631807,-1.0366120789,1.134466462\H,0,-1.3788500308,-1.480616  
5909,1.6139808013\C,0,-3.8017262185,0.4576205809,-0.7398064854\H,0,-2.  
0267365049,1.1060221253,-1.7911592972\C,0,-4.3210070714,-0.3285816994,  
0.2993720012\H,0,-3.8347068207,-1.6500358357,1.9502465469\H,0,-4.47808  
91232,0.9960767961,-1.410327078\H,0,-5.4015207557,-0.396104547,0.45352  
79849\C,0,0.6640640232,3.3169851798,1.0945895913\C,0,0.2413387105,2.48  
39315804,-0.6019544778\H,0,0.1341705434,4.256363236,0.8945543772\H,0,0  
.123849358,2.6364662472,1.7598770848\H,0,0.7743833623,3.1827430112,-1.  
2525418567\H,0,-0.8438482885,2.632212338,-0.5779631882\C,0,0.722715696  
4,1.1408725522,-0.5947802295\C,0,2.0519287681,3.3737879589,1.202492888  
8\H,0,2.623828942,4.1793650162,0.7340144491\H,0,2.6270323608,2.5526024  
534,1.6327693682\\Version=EM64L-G09RevA.01\State=1-A\HF=-711.5831475\R  
MSD=5.349e-09\Dipole=-1.2350662,1.528339,0.8780036\Quadrupole=-1.67961  
74,9.1653768,-7.4857593,-0.0794152,2.8703105,-1.8123814\PG=C01 [X(C17H  
15N1)]\\@

### TS9-1

1\1\GINC-LOCALHOST\SP\RBPW91\6-311++G(d,p)\C17H15N1\YIN\16-Jan-2017\0\  
\#p bpw91/6-311++g(d,p) geom=check scrf=(iefpcm,smd,solvent=ChloroBenz  
ene)\\Title Card Required\\0,1\C\C,1,1.4510074\C,1,1.42146203,2,119.56  
823975\C,2,1.42423414,1,105.57015881,3,-178.78700519,0\C,2,1.41998727,  
1,120.56889886,3,-2.12490193,0\C,3,1.38782801,1,118.51074858,2,1.55806  
72,0\H,3,1.09296693,1,119.70551366,2,-179.21974614,0\C,5,1.38799431,2,  
118.4750837,1,1.22163924,0\H,5,1.09376853,2,120.87503481,1,-177.594702  
49,0\H,6,1.09448808,3,119.45434462,1,179.28162467,0\H,8,1.09359315,5,1  
19.84088792,2,-179.56792845,0\N,1,1.36264958,3,127.12121077,6,-179.106  
99961,0\C,4,1.47422675,2,126.59035423,1,169.21492813,0\C,13,1.41540799  
,4,120.78384063,2,50.65940247,0\C,13,1.41442845,4,120.971719,2,-127.47  
604504,0\C,14,1.40031458,13,120.86766683,4,-178.28161689,0\H,14,1.0935  
6473,13,119.21785751,4,2.56304246,0\C,15,1.40049015,13,120.81056793,4,  
178.15307103,0\H,15,1.09271175,13,119.34592449,4,0.09696949,0\C,18,1.4  
0315693,15,120.27726875,13,0.1854534,0\H,16,1.09382749,14,119.70023061  
,13,-179.72951886,0\H,18,1.09378675,15,119.64185135,13,-179.42079054,0  
\H,20,1.09356356,18,120.1876765,15,179.90266177,0\C,4,2.21301258,2,112  
.39518106,1,-64.30632354,0\C,24,2.27535316,4,73.80044662,2,124.9890028  
,0\H,24,1.0957752,4,118.9209218,2,27.92810596,0\H,24,1.09610392,4,85.1

0103493,2,-84.46088569,0\H,25,1.09977224,24,110.77541371,4,-129.796427  
75,0\H,25,1.10136221,24,140.60710962,4,57.71063971,0\C,12,1.36652132,1  
,105.07293136,3,-178.38764996,0\C,24,1.53020799,4,102.00863446,2,157.2  
5674518,0\H,31,1.1026369,24,114.04215928,4,-170.54800825,0\H,31,1.0999  
9859,24,111.03781891,4,67.0210167,0\\Version=EM64L-G09RevA.01\State=1-  
A\HF=-711.6240879\RMSD=5.809e-09\Dipole=-1.1102584,0.6371305,1.7822361  
\Quadrupole=5.3680727,-1.5706457,-3.7974269,1.660918,0.0723124,-1.3508  
184\PG=C01 [X(C17H15N1)]\@



The total energies, enthalpies and free energies of the lowest conformers of all species shown in Scheme 8 and archive entries

Table S6<sup>a</sup>

|                         | $E_{\text{tot}} (E_h)$ | $H_{298, \text{PhCl}}$ | $G_{298, \text{PhCl}}$ | # of imaginary frequencies       |
|-------------------------|------------------------|------------------------|------------------------|----------------------------------|
| <b>3b</b>               | -860.4702738           | -860.1480818           | -860.2161568           | 0                                |
| <b><sup>1</sup>IN8</b>  | -2818.10336            | -2817.0892263          | -2817.2443343          | 0                                |
| <b><sup>1</sup>TS14</b> | -2818.09616            | -2817.0829407          | -2817.2331677          | 1<br>(-185.83 cm <sup>-1</sup> ) |
| <b><sup>1</sup>IN9</b>  | -2818.156256           | -2817.1394976          | -2817.2895336          | 0                                |
| <b><sup>1</sup>TS15</b> | -2818.095662           | -2817.0817222          | -2817.2313272          | 1<br>(-483.17 cm <sup>-1</sup> ) |
| <b><sup>1</sup>TS16</b> | -2818.131083           | -2817.1166784          | -2817.2664484          | 1<br>(-456.86 cm <sup>-1</sup> ) |
| <b><sup>3</sup>IN8</b>  | -2818.105215           | -2817.0914428          | -2817.2475168          | 0                                |
| <b><sup>3</sup>TS14</b> | -2818.085176           | -2817.0727153          | -2817.2248943          | 1<br>(-245.46 cm <sup>-1</sup> ) |
| <b><sup>3</sup>IN9</b>  | -2818.118506           | -2817.1033855          | -2817.2537195          | 0                                |
| <b><sup>3</sup>TS17</b> | -2818.089377           | -2817.0776443          | -2817.2296983          | 1<br>(-373.52 cm <sup>-1</sup> ) |
| <b><sup>3</sup>IN10</b> | -2818.103077           | -2817.0904301          | -2817.2447311          | 0                                |
| <b><sup>3</sup>TS18</b> | -2818.080875           | -2817.0690973          | -2817.2211233          | 1<br>(-334.91 cm <sup>-1</sup> ) |
| <b><sup>3</sup>TS19</b> | -2818.098449           | -2817.0849928          | -2817.2391958          | 1<br>(-432.18 cm <sup>-1</sup> ) |
| <b>P5</b>               | -2818.181063           | -2817.1631598          | -2817.3149548          | 0                                |
| <b>P6</b>               | -2818.189514           | -2817.1723194          | -2817.3212114          | 0                                |
| <b>5a</b>               | -751.0133886           | -750.7010041           | -750.7585011           | 0                                |
| <b>5a'</b>              | -751.0364487           | -750.7229104           | -750.7808714           | 0                                |

a. SMD/BPW91/BS2// BPW91/BS1

### 3b

```
1\1\GINC-A737\SP\RBPW91\6-311++G(d,p)\C18H17N3\SIOC001\20-Jun-2016\0\
#p bpw91/6-311++G(d,p) scrf=(iefpcm,smd,solvent=chlorobenzene) geom=ch
eck\Title Card Required\0,1\C,0,1.4324066894,0.3539919987,-0.0927680
864\C,0,1.5156604745,0.7490208752,1.2497426007\C,0,1.3153728382,-0.179
2903762,2.2944771\C,0,1.0057319317,-1.5132683126,1.949597575\C,0,0.927
1596555,-1.9102966818,0.6085280078\C,0,1.1416869786,-0.9787907524,-0.4
189058954\H,0,1.5868287423,1.0922387118,-0.8854909171\H,0,1.7201933726
,1.794598056,1.4983859615\H,0,0.8361154105,-2.2438386225,2.7453322094\
H,0,0.6961566766,-2.9516046739,0.3647662031\H,0,1.0757584149,-1.288100
0257,-1.4659694249\C,0,1.3754470776,0.2389796028,3.7323304726\C,0,0.11
13315494,0.0225891949,4.5125123215\C,0,-1.0443567099,0.7667880884,4.20
08611389\C,0,0.0057515937,-0.947472255,5.5429049775\C,0,-2.2477173066,
0.5923081987,4.8951437106\H,0,-0.9824121641,1.5002854271,3.3922510554\
C,0,-1.2019624275,-1.1289050444,6.2466522368\C,0,-2.3226624382,-0.3579
913063,5.9248345986\H,0,-3.1225612931,1.1934357917,4.6337339264\H,0,-1
.2613351298,-1.8812184721,7.0386346493\H,0,-3.2554420785,-0.5074048917
,6.4755546937\N,0,1.1709854673,-1.7241959052,5.8051407227\N,0,1.137054
6625,-2.5950157963,6.6891210194\N,0,1.2711155548,-3.4385927342,7.47078
59509\C,0,2.4755696182,0.8027627687,4.2954847966\C,0,3.8396572611,0.98
3352239,3.6307944563\C,0,2.5657138996,1.3379833157,5.7229851214\H,0,4.
3415467637,-0.0032283924,3.5881510852\H,0,3.7893479637,1.3462353114,2.
5943669973\H,0,2.1009768851,0.6726567078,6.465647834\H,0,2.024060874,2
.302408444,5.7815316313\C,0,4.0740991294,1.5623861464,5.9699567275\H,0
,4.539311776,0.6223315101,6.3166653836\H,0,4.275124747,2.3311541414,6.
7332053829\C,0,4.6175888629,1.9265450134,4.5744619441\H,0,5.7102442555
,1.8146712572,4.4871025426\H,0,4.373576179,2.9787304733,4.3403984156\
Version=ES64L-G09RevD.01\State=1-A\HF=-860.4702738\RMSD=6.839e-09\Dipo
le=-0.2638177,0.8660847,-0.2176847\Quadrupole=3.0307045,-2.1727962,-0.
8579083,2.5315652,-2.9432855,2.6432261\PG=C01 [X(C18H17N3)]\@
```

### <sup>1</sup>IN8

```
1\1\GINC-A749\FOpt\RBPW91\GenECP\C50H57N1O8Rh2\SIOC001\21-Jun-2016\0\
#p opt genecp bpw91\Title Card Required\0,1\Rh,0.0485998223,-0.04467
01555,0.1599631946\Rh,-0.2775560599,0.057513434,2.5794026138\O,2.07066
3447,0.0025934242,0.4541473468\C,2.5224357827,0.0497230044,1.652397968
1\O,1.811648289,0.0707315947,2.7251927308\O,0.099484326,-2.0981496168,
0.3046714934\C,-0.0433256552,-2.6398079891,1.4574842063\O,-0.228210339
,-2.0058142868,2.5628241422\O,-2.0065944605,-0.0502895898,-0.046930425
6\C,-2.7398171956,-0.0138407206,1.0027581361\O,-2.311698401,0.01987803
36,2.2168981464\O,0.0238341047,1.9929900173,0.0923883231\C,-0.15023029
8,2.6494982978,1.1786772616\O,-0.3196645685,2.1341788884,2.3470798926\
C,-1.1731607973,-0.4325548635,5.3527092402\C,-1.0258210317,-0.14029996
92,6.7778547884\C,-2.1039614351,-1.4663981123,4.9664014495\C,-0.158049
3274,0.9708877606,7.2635338528\C,-1.6969038894,-0.9511981866,7.7071923
```

991\C,-2.778447197,-2.2174668963,5.9190940732\H,-2.2423432069,-1.66277  
86098,3.9048101137\C,-2.5672081231,-1.9697045441,7.2926801563\H,-1.550  
7799702,-0.7628022711,8.7746784284\H,-3.4666790254,-3.0073412381,5.604  
9044164\H,-3.0950936274,-2.5668657793,8.0422752162\N,-0.3512866414,0.2  
248946015,4.5098604047\C,1.0348459651,0.5319734635,8.0556144281\C,1.99  
44050313,-0.3171843483,7.4601521131\C,1.2144495016,0.9074151497,9.4051  
897207\C,3.1136648129,-0.7500564899,8.1840513945\H,1.8600764397,-0.616  
585534,6.4169790625\C,2.3316248678,0.4692167554,10.1300554568\H,0.4624  
402308,1.5376028852,9.8894414017\C,3.287212329,-0.3585962829,9.5208389  
695\H,3.8528498152,-1.3975028113,7.7027595654\H,2.452095799,0.76953869  
12,11.1753212394\H,4.1586066543,-0.7009530041,10.0865470609\C,4.056711  
1701,0.0605590094,1.8439150676\C,-0.1869669623,4.1918837438,1.08860546  
41\C,4.7751215289,0.0730166968,0.4813996775\H,5.8667433547,0.063339038  
9,0.6428074496\H,4.507482118,-0.8112303884,-0.1166271884\C,0.883373043  
6,4.8002100582,2.0635907981\H,0.8062771552,5.8984263065,1.9720146752\H  
,0.5886545652,4.5389456991,3.0934092234\C,-1.5884243755,4.6620241762,1  
.5540752879\H,-1.8015390018,4.3257637445,2.5796735714\H,-1.6402923199,  
5.7635794004,1.5269055323\H,-2.376388925,4.2712604419,0.8893223736\C,4  
.444727326,-1.2183215384,2.6288334528\H,5.5336996138,-1.2327347716,2.8  
047600506\H,3.9312224938,-1.259408852,3.6011460657\H,4.1835933327,-2.1  
252526013,2.0587062209\C,4.4688395553,1.3073073568,2.7063548456\H,4.02  
75319562,1.1853377757,3.709114699\H,5.5661845014,1.2608246409,2.824958  
5891\C,0.0244209133,-4.1820588585,1.530435665\C,-4.2716227942,0.003121  
3376,0.7942090162\C,-1.1164416494,-4.788352075,0.6350227799\H,-1.05093  
2,-5.8859078646,0.740501685\C,-4.6965203521,-1.2949441664,0.0158891506  
\H,-5.7958250102,-1.2576358668,-0.0854695697\H,-4.2749523767,-1.230100  
7397,-1.0007485411\C,-4.2718877947,-2.6056648346,0.6492576802\C,-5.097  
6309781,-3.3141264223,1.5446410564\C,-3.0037826804,-3.1371924976,0.349  
8349571\C,-4.6492433789,-4.5079983407,2.1297052519\H,-6.1005476614,-2.  
9390977065,1.7721123781\C,-2.5211635373,-4.313500705,0.9525317506\H,-2  
.3677376094,-2.61406903,-0.368690472\C,-3.3672675804,-5.0017967648,1.8  
445301098\H,-5.3066778781,-5.0615592937,2.8071597537\H,-3.028358371,-5  
.9357743112,2.304047112\C,1.3862249085,-4.6284063712,0.9413209191\H,2.  
2225864479,-4.2527845801,1.5535301355\H,1.4438495683,-5.7299370511,0.9  
312041126\H,1.5166352014,-4.2597909583,-0.0870083935\C,-0.0982473777,-  
4.676892389,2.9840369743\H,-0.0116895939,-5.7767237617,3.0047844666\H,  
0.7001200402,-4.2569509012,3.6143830071\H,-1.0612977468,-4.3956429934,  
3.4331393102\C,-4.6194777466,1.2279554407,-0.0884966587\H,-5.702139716  
5,1.2400677996,-0.2997333672\H,-4.3658312542,2.1697095763,0.4255053644  
\H,-4.0751372388,1.1975889653,-1.0441071519\C,-5.0162095195,0.10381604  
46,2.1387825482\H,-4.7229416449,1.0118227972,2.6872818648\H,-6.1030803  
503,0.148729472,1.9538556184\H,-4.8099235582,-0.7601123654,2.786492874  
2\H,-0.8816146508,-4.5491915047,-0.4153864672\H,4.5178320338,0.9662423  
155,-0.1056958596\C,0.0615618684,4.656436033,-0.3590476845\H,0.0136689  
938,5.7580095551,-0.4030521614\H,1.0464655995,4.3355034836,-0.72720691

32\H,-0.7006719424,4.2514295724,-1.0418423461\C,4.0631117711,2.6528039  
02,2.1358872252\C,2.7737356377,3.1551119285,2.392431922\C,4.9306455024  
,3.4167039769,1.3304020954\C,2.3131068919,4.3558828713,1.8212780594\H,  
2.1061198908,2.5880395674,3.0458792593\C,4.5037132399,4.6364489668,0.7  
852646993\H,5.9473306488,3.0595824802,1.13723049\C,3.2005846306,5.0995  
669465,1.0187652157\H,5.1903544994,5.2290284613,0.173144063\H,2.873259  
0647,6.0490305639,0.5830016178\C,-0.4640317495,2.2771846008,7.03588638  
4\C,-1.732435945,2.7905798189,6.3560791261\C,0.3826888025,3.4789702887  
,7.4379202105\C,-1.5230197279,4.3161583561,6.2107824002\H,-2.601284900  
8,2.585111129,7.0109620438\H,-1.9324643623,2.2941860062,5.3953702962\H  
,0.8990377442,3.3665237362,8.4016716249\H,1.1750364145,3.6073105033,6.  
6733454198\H,-2.4692934311,4.8807993462,6.2157628939\H,-1.0146740139,4  
.5317244318,5.2547225233\C,-0.588513142,4.6769692554,7.3830978078\H,-1  
.1669795161,4.7364119515,8.3231345706\H,-0.0733624616,5.6420176589,7.2  
502749151\\Version=ES64L-G09RevD.01\State=1-A\HF=-2817.3452002\RMSD=6.  
315e-09\RMSF=7.084e-06\Dipole=-0.7448436,-0.3177984,1.248228\Quadrupol  
e=4.3811815,4.1003317,-8.4815132,-2.5095415,-1.9130209,-3.3552419\PG=C  
01 [X(C50H57N1O8Rh2)]\@

#### **<sup>1</sup>TS14**

1\1\GINC-SHI\_02\SP\RBPW91\GenECP\C50H57N1O8Rh2\YIN\12-Jul-2016\0\#\#p g  
enecp bpw91 geom=check scrf=(iefpcm,smd,solvent=chlorobenzene)\Title  
Card Required\0,1\Rh,0,-1.6120783943,-2.1040588875,0.4448274567\Rh,0,  
-0.2720288634,-0.1211786535,-0.047298119\O,0,-0.2930983901,-2.58480083  
17,1.9328041091\C,0,0.7122714999,-1.8191571016,2.1463722787\O,0,0.9943  
593218,-0.7398335626,1.5038243774\O,0,-2.7078320081,-1.034622271,1.805  
4425082\C,0,-2.4038201514,0.1997662378,1.976012307\O,0,-1.4748223076,0  
.8335251271,1.3537500526\O,0,-2.8692893434,-1.5361264842,-1.1006647524  
\C,0,-2.6148979151,-0.4621742053,-1.7516330463\O,0,-1.6229566747,0.332  
0453071,-1.5418626884\O,0,-0.4922700757,-3.1609519438,-0.8881395891\C,  
0,0.4410575166,-2.5700697814,-1.5311861946\O,0,0.7591796214,-1.3250199  
558,-1.4074184673\C,0,0.4464208585,2.7622754241,-0.4457448716\C,0,1.49  
99675909,3.7862788472,-0.5499188928\C,0,-0.9294760976,3.2142717265,-0.  
4770763653\C,0,2.8466144196,3.2875036829,-0.6295419488\C,0,1.145396253  
,5.1559892077,-0.5157979408\C,0,-1.224648403,4.5644609134,-0.468184466  
2\H,0,-1.7203275169,2.4677797115,-0.4607336626\C,0,-0.1907690168,5.541  
7568497,-0.4808414927\H,0,1.935810611,5.9096503326,-0.5632694352\H,0,-  
2.2703603773,4.8859132376,-0.4642558026\H,0,-0.4501042912,6.6042581609  
, -0.4967862565\N,0,0.8338854937,1.5121374643,-0.1834366149\C,0,3.94242  
61746,4.0600859045,0.0173608915\C,0,3.7850297737,4.5878643002,1.320712  
3994\C,0,5.1578732948,4.3147597976,-0.6613040572\C,0,4.8104325404,5.32  
49396626,1.9274144592\H,0,2.8543167685,4.3973488245,1.8617042796\C,0,6  
.1808825194,5.0549858319,-0.0558985474\H,0,5.2864599651,3.9429312435,-  
1.6819695335\C,0,6.0126083743,5.5611662307,1.242840812\H,0,4.671527399  
6,5.7118747701,2.941187553\H,0,7.1089580337,5.2449833979,-0.6030426336

\H,0,6.8121759671,6.1379504694,1.7162984862\C,0,1.6743619169,-2.206829  
3833,3.2946910875\C,0,1.2420777353,-3.4043806452,-2.5566936654\C,0,1.2  
210387781,-3.5168723947,3.9664514485\H,0,1.910279151,-3.765177675,4.79  
19032448\H,0,0.2071340567,-3.4173619998,4.3827072449\C,0,2.7693920922,  
-3.3626189943,-2.1952173168\H,0,3.2909740552,-3.9724302072,-2.95437106  
99\H,0,3.1150898504,-2.3236953955,-2.3232102912\C,0,1.0559821597,-2.76  
02843572,-3.9535311829\H,0,1.3945710479,-1.7135336171,-3.9612805925\H,  
0,1.6363642353,-3.3225926882,-4.7043663788\H,0,-0.0026611159,-2.783510  
8351,-4.2601850854\C,0,1.6679084317,-1.0546908867,4.3309547447\H,0,2.3  
750160659,-1.2806224187,5.1471963202\H,0,1.9592843237,-0.1004697844,3.  
8666444249\H,0,0.6671189476,-0.9322892915,4.7772091363\C,0,3.134102416  
9,-2.3439676482,2.7307123005\H,0,3.455424833,-1.3468234176,2.387470737  
6\H,0,3.7798663901,-2.6174127973,3.5842153907\C,0,-3.2198570373,0.9853  
899552,3.0281515123\C,0,-3.5817267095,-0.0934432457,-2.9014023429\C,0,  
-4.7389748143,0.9523477305,2.624749643\H,0,-5.2816760943,1.5397072508,  
3.3867290776\C,0,-5.038124412,0.0421506507,-2.3252003109\H,0,-5.687842  
4706,0.3273394654,-3.1717986612\H,0,-5.3606347039,-0.9576159285,-1.991  
0674386\C,0,-5.2038203628,1.0267532267,-1.1837112782\C,0,-5.5568832047  
,2.3743698133,-1.3951173095\C,0,-4.9885623455,0.5945418541,0.138264866  
3\C,0,-5.6689587487,3.25715523,-0.3102396446\H,0,-5.7608522469,2.73018  
63512,-2.4100032766\C,0,-5.0586284794,1.4717660547,1.2362902547\H,0,-4  
.7489839913,-0.4563436704,0.3180963327\C,0,-5.4125410776,2.8142868925,  
0.9962380861\H,0,-5.9650389637,4.2963269358,-0.4837544955\H,0,-5.50347  
65435,3.511023083,1.8357141594\C,0,-3.0677451185,0.2579175171,4.387870  
1341\H,0,-2.0195358636,0.276105187,4.7290099663\H,0,-3.6799479282,0.76  
54593692,5.1524039118\H,0,-3.3910090306,-0.7913738954,4.3174917589\C,0  
, -2.7167706404,2.4352301261,3.1562658727\H,0,-3.2992098254,2.957825954  
8,3.9343700765\H,0,-1.655131582,2.462003906,3.4448574429\H,0,-2.819724  
2939,2.9898293787,2.2129713289\C,0,-3.5773852278,-1.2611960229,-3.9200  
092249\H,0,-4.2981264358,-1.0545828289,-4.7293227965\H,0,-2.5818042629  
, -1.3808089004,-4.378353135\H,0,-3.8537204747,-2.2108451751,-3.4377799  
459\C,0,-3.1451107641,1.207172634,-3.6014603835\H,0,-2.1311430948,1.11  
08885733,-4.0185104545\H,0,-3.839129233,1.4298230566,-4.4300322281\H,0  
, -3.1424260145,2.062718113,-2.9112075117\H,0,-5.0856614191,-0.09066426  
8,2.7108720632\H,0,1.2106919147,-4.3558414171,3.2559353378\C,0,0.73048  
19865,-4.8578911087,-2.5853328048\H,0,1.2983763536,-5.4300150033,-3.33  
89983961\H,0,0.8495568617,-5.3512925211,-1.610110822\H,0,-0.3358274665  
, -4.8985550073,-2.8542850039\C,0,3.3078589493,-3.344597673,1.604541827  
4\C,0,3.0551082258,-2.9461479977,0.2791570819\C,0,3.6995426467,-4.6778  
794574,1.8353647981\C,0,3.1283444285,-3.8428756017,-0.8019926883\H,0,2  
.7774204268,-1.9072386636,0.0859818824\C,0,3.8139537251,-5.5795611506,  
0.766831686\H,0,3.9259815879,-5.0087733758,2.853921131\C,0,3.522161088  
7,-5.1702409379,-0.5427622542\H,0,4.1330299024,-6.6089451104,0.9560302  
658\H,0,3.6114148805,-5.8823688625,-1.3693742339\C,0,3.0411077278,2.01  
97940957,-1.2017033793\C,0,2.4061412236,1.5364586554,-2.5050173393\C,0

,4.2737718016,1.1633667023,-0.9868893909\C,0,3.6648864273,1.2992469777  
,-3.3753174735\H,0,1.6972524328,2.259606623,-2.9339533577\H,0,1.879231  
6372,0.5809125965,-2.3587860514\H,0,5.0780365388,1.7027124538,-0.46697  
2544\H,0,3.9865382911,0.32534741,-0.3261272618\H,0,4.0560908367,2.2667  
148755,-3.7381713873\H,0,3.4526254113,0.6788432188,-4.261447016\C,0,4.  
6787602125,0.6424185885,-2.4013497164\H,0,5.7204438118,0.9001728777,-2  
.6512409954\H,0,4.6031880089,-0.4558151088,-2.4461770328\\Version=EM64  
L-G09RevA.01\State=1-A\HF=-2818.0961595\RMSD=1.758e-09\Dipole=0.976203  
5,1.398802,-0.6841176\Quadrupole=-3.5566557,-3.4981572,7.0548129,-2.59  
7422,-0.8470901,6.6637744\PG=C01 [X(C50H57N1O8Rh2)]\@

## IN9

1\GINC-SHI\_02\SP\RBPW91\GenECP\C50H57N1O8Rh2\YIN\23-Jun-2016\0\#p g  
enecp bpw91 geom=check scrf=(iefpcm,smd,solvent=chlorobenzene)\Title  
Card Required\0,1\Rh,0,0.0075159039,-0.0651773433,0.0046588443\Rh,0,-  
0.1816481671,0.0799370872,2.4232185103\O,0,2.0372884381,0.0501780961,0  
.162073139\C,0,2.5620658943,0.1553439665,1.3244980404\O,0,1.914819786,  
0.1890733699,2.4385427619\O,0,0.1458871603,-2.1140367083,0.1854537115\  
C,0,0.0951877144,-2.6318763979,1.3582040963\O,0,-0.0298717437,-1.98151  
55591,2.4591871591\O,0,-2.0459505515,-0.1529910418,-0.1074865195\C,0,-  
2.724401004,-0.107716515,0.9811750224\O,0,-2.2343629983,-0.0174740898,  
2.1657794055\O,0,-0.1091743321,1.9679445999,-0.1119670176\C,0,-0.25054  
67873,2.6449709487,0.9649533764\O,0,-0.3240863798,2.1553953828,2.15436  
86916\C,0,-1.3060258296,-0.7716348637,5.2360345004\C,0,-1.2899420761,-  
0.5912715822,6.695317387\C,0,-2.1787499612,-1.7673175524,4.6717773333\  
C,0,-0.3798568741,0.4096112513,6.9800739831\C,0,-2.1583753349,-1.36882  
16682,7.5365666369\C,0,-2.977309805,-2.498763156,5.5205252722\H,0,-2.1  
961501116,-1.9259504809,3.5971365829\C,0,-2.9801064256,-2.3002060217,6  
.9509623213\H,0,-2.1606911032,-1.2029695735,8.616777212\H,0,-3.6422784  
14,-3.2568362073,5.0971024885\H,0,-3.6546652651,-2.9024713146,7.566076  
0733\N,0,-0.4611653853,0.0513573872,4.6127968701\C,0,-0.0166492942,0.8  
561417598,8.3379306717\C,0,0.3939963511,-0.1032032733,9.2973581086\C,0  
,-0.100394887,2.2090519007,8.746311571\C,0,0.7209889013,0.2775356474,1  
0.6050401866\H,0,0.4776826649,-1.1505308157,8.9953404451\C,0,0.2185181  
069,2.5850284126,10.0571153901\H,0,-0.4467656797,2.9640542542,8.038564  
485\C,0,0.6347586301,1.6236002765,10.9912392202\H,0,1.0475051339,-0.48  
05080391,11.3229061997\H,0,0.1357704663,3.6352097899,10.3515372839\H,0  
,0.8878956238,1.9214012875,12.0125221021\C,0,4.1050924056,0.2282400494  
,1.4032530348\C,0,-0.3644997354,4.1820344243,0.8320493853\C,0,4.723238  
5249,0.1787890964,-0.0074672571\H,0,5.8234870207,0.2116473921,0.072732  
7767\H,0,4.4438152567,-0.7483114514,-0.5302997313\C,0,0.7743540171,4.8  
689397034,1.667480267\H,0,0.6488864314,5.9588890208,1.5383253847\H,0,0  
.5906494222,4.6493556749,2.7324420025\C,0,-1.7265731984,4.6173321364,1  
.4283317999\H,0,-1.8237017063,4.2991122337,2.4771208932\H,0,-1.8216745  
781,5.7155568012,1.3830584748\H,0,-2.5634713312,4.1830235833,0.8570300

35\C,0,4.6019228706,-0.9828299529,2.2323990374\H,0,5.6998741467,-0.943  
2104409,2.3323910363\H,0,4.158513636,-0.9885787727,3.2395555478\H,0,4.  
3427572722,-1.9321190512,1.7354357019\C,0,4.5359537719,1.5418533169,2.  
1480958782\H,0,4.1885785045,1.466889913,3.191841123\H,0,5.640284861,1.  
5430412836,2.1758409636\C,0,0.2077204317,-4.1717460433,1.4415139855\C,  
0,-4.2638697284,-0.1565450833,0.8440020715\C,0,-0.9309993499,-4.817353  
904,0.570868072\H,0,-0.8207165425,-5.9123713998,0.666485026\C,0,-4.670  
9721958,-1.4663340862,0.0754552876\H,0,-5.774163385,-1.4697457135,0.01  
79456596\H,0,-4.2929515896,-1.3796614691,-0.9565124911\C,0,-4.17612072  
95,-2.766802795,0.6800164508\C,0,-4.9560923184,-3.527689572,1.57340473  
17\C,0,-2.8917157591,-3.2390033747,0.3497035149\C,0,-4.4478149798,-4.7  
133401726,2.126107191\H,0,-5.9702855205,-3.2004367637,1.8237315951\C,0  
, -2.34756334,-4.4036734211,0.9228542387\H,0,-2.2936708211,-2.676299459  
1,-0.3707852569\C,0,-3.1493656553,-5.1445049231,1.8136350106\H,0,-5.07  
10803395,-5.3099152798,2.7995331632\H,0,-2.7628131078,-6.0706153793,2.  
2509765299\C,0,1.5691033711,-4.5833301441,0.8262081283\H,0,2.407250117  
, -4.1776308726,1.4165676556\H,0,1.6606320595,-5.682753705,0.8214931847  
\H,0,1.6646731428,-4.2178224925,-0.207172353\C,0,0.1288317267,-4.65962  
96959,2.8997035094\H,0,0.2395459995,-5.7574052712,2.9266563169\H,0,0.9  
324022364,-4.2178546756,3.5083673305\H,0,-0.8289718069,-4.3952300185,3  
.3698754406\C,0,-4.7040012674,1.057655667,-0.0129198938\H,0,-5.7953033  
45,1.0272715047,-0.1721337517\H,0,-4.4639761858,2.0055357019,0.4964095  
861\H,0,-4.2053708968,1.0549609514,-0.9938283962\C,0,-4.9506911462,-0.  
0921005059,2.2209246801\H,0,-4.6766147603,0.8290609231,2.7571871037\H,  
0,-6.0459269996,-0.0991105947,2.0852732331\H,0,-4.674391012,-0.9433927  
555,2.8589796739\H,0,-0.7313940242,-4.5621901996,-0.4829431981\H,0,4.3  
925431534,1.0256654506,-0.6256791728\C,0,-0.284224333,4.6075186535,-0.  
6463522319\H,0,-0.3928649196,5.7034106635,-0.7193716352\H,0,0.67502248  
26,4.3208348497,-1.1006776325\H,0,-1.0877672301,4.1415284765,-1.236459  
9292\C,0,4.0296834858,2.8372643505,1.5426262315\C,0,2.7439898846,3.300  
6884676,1.8757790824\C,0,4.7991536507,3.5995983195,0.6423654556\C,0,2.  
1910731978,4.4628764457,1.3080845993\H,0,2.1491091555,2.7284331973,2.5  
907173585\C,0,4.2793150282,4.7786564506,0.0875342711\H,0,5.8121313155,  
3.2755896617,0.383211585\C,0,2.9824826285,5.2054572695,0.4102934395\H,  
0,4.8903086404,5.3704876802,-0.6006840801\H,0,2.5867588935,6.126571057  
8,-0.0294109284\C,0,0.2348414558,0.8448329757,5.655473603\C,0,0.209125  
2105,2.3831509649,5.3648596056\C,0,1.7766076879,0.5299707991,5.6520549  
955\C,0,1.5678989338,2.9661356415,5.8529709029\H,0,-0.6678670734,2.862  
5415082,5.827417711\H,0,0.0969887655,2.5018071118,4.2794358055\H,0,2.0  
034933308,-0.4211762761,6.1597921945\H,0,2.0767603108,0.4356591985,4.5  
994748804\H,0,1.4381619955,3.6916943992,6.6718669226\H,0,2.0578924951,  
3.5069609362,5.0274358898\C,0,2.429302139,1.7583482867,6.3080405082\H,  
0,2.4132174919,1.666517402,7.4053482379\H,0,3.4864001357,1.8571432008,  
6.0099796052\\Version=EM64L-G09RevA.01\State=1-A\HF=-2818.1562562\RMSD  
=2.850e-09\Dipole=0.0454581,0.1676406,2.3053407\Quadrupole=-0.8122905,

2.6575852,-1.8452947,-3.3647505,1.3207346,-2.8279477\PG=C01 [X(C50H57N108Rh2)]\@

### 'TS15

1\1\GINC-A713\SP\RBPW91\GenECP\C50H57N108Rh2\SIOC001\18-Jul-2016\0\#\#p  
genecp bpw91 geom=check scrf=(iefpcm,smd,solvent=chlorobenzene)\Titl  
e Card Required\0,1\rh,0,-1.6022665004,-1.994050593,0.533448647\rh,0,  
-0.2888967056,-0.0480220461,-0.0707466729\o,0,-0.228984219,-2.43508623  
94,1.9813846054\C,0,0.7790844876,-1.6602913621,2.1387601262\o,0,1.0216  
944032,-0.5929301458,1.4576757388\o,0,-2.623952783,-0.8393842483,1.881  
6915616\C,0,-2.3375104206,0.4058963257,1.994043416\o,0,-1.4350073447,1  
.0308088354,1.3221430372\o,0,-2.9282287951,-1.4842914461,-0.9664469974  
\C,0,-2.7150402412,-0.4213077658,-1.6521515521\o,0,-1.7101695373,0.370  
5953631,-1.5148581054\o,0,-0.5381700835,-3.1227127057,-0.7915069903\C,  
0,0.3965474596,-2.5557620801,-1.4592826102\o,0,0.7171549138,-1.3104692  
156,-1.3853438674\C,0,1.5472181138,1.6270477708,-2.0051164402\C,0,2.79  
49289764,2.3512863089,-2.0069748419\C,0,1.0196462305,1.0799752587,-3.2  
023084028\C,0,3.0119725196,2.825081728,-0.6800901991\C,0,3.5332153554,  
2.4690140356,-3.214829243\C,0,1.7560869385,1.2296423842,-4.370798083\H  
,0,0.0609020194,0.5627469175,-3.1854715558\C,0,3.0102681383,1.90863917  
68,-4.3730268334\H,0,4.4901717599,2.9972558371,-3.228568037\H,0,1.3712  
390673,0.8196595694,-5.308888823\H,0,3.5651805192,1.9950518254,-5.3120  
868987\N,0,0.9962151756,1.6062351409,-0.7447844953\C,0,4.1326884309,3.  
6832851337,-0.2354718234\C,0,4.435887119,4.8756731335,-0.935759507\C,0  
,4.9493919965,3.3386402177,0.8663631088\C,0,5.5028316968,5.6949452936,  
-0.5438856755\H,0,3.816548114,5.1621740818,-1.7907565575\C,0,6.0125482  
67,4.1615659144,1.2625958215\H,0,4.765903941,2.399232184,1.3948523459\  
C,0,6.2933939907,5.3441262069,0.5610591955\H,0,5.7137720688,6.61313168  
44,-1.100306039\H,0,6.6328329588,3.869852555,2.1153360162\H,0,7.125479  
6141,5.9834420472,0.8694034205\C,0,1.7834206779,-2.0127514204,3.261754  
8473\C,0,1.1905154266,-3.4252295567,-2.4627973471\C,0,1.4009614951,-3.  
3452700582,3.9340665843\H,0,2.1214466118,-3.5718022541,4.7387667602\H,  
0,0.3951413825,-3.2908187772,4.3771182883\C,0,2.7312568191,-3.27661161  
21,-2.1982928376\H,0,3.2432024162,-3.8886908504,-2.9623267763\H,0,3.00  
60969281,-2.2259595816,-2.386226225\C,0,0.8962170784,-2.8908806212,-3.  
8878994196\H,0,1.2041288514,-1.83958402,-3.9903034274\H,0,1.4482142508  
, -3.4907134543,-4.6313122519\H,0,-0.1781066694,-2.9679606406,-4.124369  
2682\C,0,1.7423405563,-0.8714477378,4.3095572614\H,0,2.4626489894,-1.0  
797089863,5.118804312\H,0,1.9996449746,0.0973159535,3.8549710028\H,0,0  
.740990747,-0.788061293,4.7633820498\C,0,3.2381592478,-2.0816654447,2.  
6735993552\H,0,3.5002905038,-1.0771182594,2.3025945761\H,0,3.912582109  
1,-2.3014754026,3.5205760891\C,0,-3.1542901648,1.1820946791,3.05735000  
68\C,0,-3.7464449375,-0.0863298253,-2.7555085831\C,0,-4.6887046828,1.0  
047639589,2.7668086137\H,0,-5.2267046313,1.5675799192,3.55055228\C,0,-  
5.1892952754,-0.0577869259,-2.134356125\H,0,-5.8867443,0.1631260815,-2



.9620649809\H,0,-5.4213115113,-1.0743076984,-1.7767750011\C,0,-5.39123  
45963,0.9321374442,-1.0034235863\C,0,-5.8812738428,2.2350780326,-1.221  
2550703\C,0,-5.0616407649,0.5560433396,0.3115270224\C,0,-6.0150949121,  
3.1312769128,-0.1502189319\H,0,-6.1713703953,2.5450023012,-2.230328291  
\C,0,-5.1470872567,1.4523998761,1.3923489177\H,0,-4.7154116353,-0.4627  
543901,0.4979853682\C,0,-5.6411024982,2.7489491459,1.14682792\H,0,-6.4  
153777037,4.1342099605,-0.3272977277\H,0,-5.7480358956,3.4563354222,1.  
9756129088\C,0,-2.8515717747,0.5434486825,4.4375303069\H,0,-1.78711494  
1,0.6574282457,4.7014988448\H,0,-3.4484488204,1.0424331831,5.219826925  
4\H,0,-3.0957165914,-0.5291711342,4.4391761032\C,0,-2.7825678729,2.673  
4305161,3.0907224017\H,0,-3.3675208141,3.1819129859,3.8761745336\H,0,-  
1.7155405871,2.8111308984,3.3226859598\H,0,-2.9969646279,3.1669884525,  
2.1314424512\C,0,-3.6979555263,-1.2293361371,-3.8019734177\H,0,-4.4457  
798748,-1.0465269534,-4.592206002\H,0,-2.7068529176,-1.2839724604,-4.2  
82098615\H,0,-3.9108920713,-2.2034363002,-3.3360625294\C,0,-3.42014635  
9,1.2564119053,-3.4356264721\H,0,-2.4249755038,1.2357280524,-3.9045430  
525\H,0,-4.1652465012,1.4609015095,-4.2234627865\H,0,-3.4383771876,2.0  
895091108,-2.718010568\H,0,-4.9349804168,-0.0606372179,2.9050541164\C,  
0,0.2047507318,3.6239507799,-0.5032235037\C,0,1.6668669555,2.600766105  
5,1.5501743732\H,0,-0.6630446978,3.1502269385,-0.9671015794\H,0,0.8313  
446485,4.1769557462,-1.2098650289\H,0,0.8981087237,1.8976058244,1.9005  
755093\H,0,2.5923115398,2.3961326062,2.108300889\C,0,1.8802578628,2.41  
53744958,0.0717546799\H,0,1.4078168052,-4.1780882731,3.216453613\C,0,0  
.754994718,-4.8999138721,-2.3646644837\H,0,1.3205869538,-5.4981114871,  
-3.0996480861\H,0,0.93976608,-5.314023985,-1.3630356836\H,0,-0.3178444  
421,-5.0117190261,-2.5826192648\C,0,3.4424456484,-3.0980736713,1.56707  
8086\C,0,3.1152348248,-2.7548579026,0.2426847208\C,0,3.9262255532,-4.3  
963503231,1.8211283226\C,0,3.1935229876,-3.6820199144,-0.8122056771\H,  
0,2.7753963407,-1.7395272056,0.02754945\C,0,4.0552410726,-5.3221320431  
,0.7751391123\H,0,4.2109192439,-4.6807284638,2.8392842337\C,0,3.680624  
9999,-4.9736432972,-0.5308950771\H,0,4.4471014793,-6.3230591979,0.9799  
345971\H,0,3.7755413522,-5.7057919003,-1.3392214318\C,0,1.1946389111,4  
.0567947894,1.7684903563\H,0,0.9472731037,4.2578471742,2.8244223468\H,  
0,1.9949322143,4.7563221394,1.4738394917\C,0,-0.0348365257,4.217783925  
1,0.8595622362\H,0,-0.9029770845,3.7246765355,1.3166787865\H,0,-0.2883  
176502,5.2885528649,0.7200827091\\Version=ES64L-G09RevD.01\State=1-A\H  
F=-2818.0956623\RMSD=5.252e-09\Dipole=0.0650635,2.2406562,0.4314\Quadr  
upole=-15.3300778,3.0077156,12.3223622,-3.3799724,8.0955219,7.4682522\  
PG=C01 [X(C50H57N1O8Rh2)]\@

## 'TS16

1\1\GINC-SHI\_02\SP\RBPW91\GenECP\C50H57N1O8Rh2\YIN\14-Jul-2016\0\#\#p g  
enecp bpw91 geom=check scrf=(iefpcm,smd,solvent=chlorobenzene)\Title  
Card Required\0,1\Rh,0,1.3053903627,-2.3069077266,0.0172104082\Rh,0,0  
.1498301016,-0.1721849979,-0.0380187831\O,0,0.0355277892,-2.9936532952

, -1.4226944986\C, 0, -0.8696000105, -2.2193779527, -1.8917917417\O, 0, -1.0803810145, -0.9989976868, -1.5320409284\O, 0, 2.5561383081, -1.6200243404, -1.465865861\C, 0, 2.3731248108, -0.4346531583, -1.9242517022\O, 0, 1.4668264618, 0.3895132956, -1.5360353473\O, 0, 2.5399178747, -1.5579874791, 1.4860069047\C, 0, 2.3557625364, -0.3493004511, 1.8768210363\O, 0, 1.4560322869, 0.4538339965, 1.4347249298\O, 0, 0.0213192987, -2.9319329542, 1.4764850949\C, 0, -0.8926169272, -2.1347769675, 1.887854684\O, 0, -1.092184554, -0.9332835691, 1.4657726019\C, 0, 0.0175454548, 3.020600112, 0.0083430564\C, 0, -0.8174834669, 4.1910416975, 0.0975346573\C, 0, 1.4256227655, 3.1724630657, -0.0521659113\C, 0, -2.1667185061, 3.7199350326, 0.1324169566\C, 0, -0.252240201, 5.4882609729, 0.1815709315\C, 0, 1.9544255708, 4.4570872718, 0.0165671723\H, 0, 2.0696241248, 2.301030829, -0.1419590358\C, 0, 1.1302182196, 5.610339897, 0.1439423699\H, 0, -0.8930895471, 6.3673003622, 0.2897725212\H, 0, 3.0404615857, 4.5811095078, -0.0186757747\H, 0, 1.5937602423, 6.5982948141, 0.2137037004\N, 0, -0.7350045867, 1.8624523616, -0.018850676\C, 0, -3.3377443176, 4.5413730166, 0.5194769373\C, 0, -3.6259602252, 5.7434880409, -0.1681966725\C, 0, -4.1444569338, 4.1929859423, 1.6259591343\C, 0, -4.6921054932, 6.5610456689, 0.2282107181\H, 0, -3.0103210873, 6.0337605157, -1.0246124781\C, 0, -5.2091560668, 5.0133750885, 2.0223408384\H, 0, -3.9155764123, 3.2906408952, 2.1971563069\C, 0, -5.4896701688, 6.1975433983, 1.3238786594\H, 0, -4.8996368352, 7.4843183644, -0.3201182456\H, 0, -5.8165400385, 4.7286747854, 2.8860974531\H, 0, -6.321302355, 6.8357281907, 1.6349380239\C, 0, -1.7804163111, -2.8002163495, -3.0015759308\C, 0, -1.8326608305, -2.6546332078, 3.0024326086\C, 0, -1.3717702645, -4.2470528636, -3.3386221645\H, 0, -2.0198481296, -4.6328648394, -4.1445833415\H, 0, -0.3278145815, -4.2937794505, -3.6836142406\C, 0, -3.3207146479, -2.6204742981, 2.5000559233\H, 0, -3.9435282721, -3.0031032618, 3.3284601459\H, 0, -3.6000064267, -1.5641057974, 2.3503719729\C, 0, -1.7137381811, -1.7002102314, 4.2169207659\H, 0, -1.9589851818, -0.6647701446, 3.9362468094\H, 0, -2.4019056963, -2.0217994351, 5.0172072651\H, 0, -0.6905151673, -1.7123931649, 4.6269706526\C, 0, -1.6345553157, -1.9134494708, -4.263189791\H, 0, -2.2993116454, -2.2832043606, -5.0624185898\H, 0, -1.8937600855, -0.8656217895, -4.0497067068\H, 0, -0.6007571984, -1.940499495, -4.6448496497\C, 0, -3.2799736137, -2.7499115822, -2.5382309682\H, 0, -3.5705405077, -1.6894674311, -2.4516148034\H, 0, -3.8808013864, -3.1810234063, -3.3589252618\C, 0, 3.3298904916, 0.0269180215, -3.048766562\C, 0, 3.3009637546, 0.1696458798, 2.9851007814\C, 0, 4.8135172322, -0.0967331223, -2.5436067987\H, 0, 5.4599406977, 0.2530956779, -3.3683919055\C, 0, 4.789734857, 0.0236803775, 2.502212575\H, 0, 5.4262063232, 0.4149260671, 3.31592148\H, 0, 5.0074381351, -1.0530977872, 2.4094015137\C, 0, 5.1319842074, 0.7156145698, 1.1961612348\C, 0, 5.6695738124, 2.0174154376, 1.1529845453\C, 0, 4.9054648902, 0.0480018137, -0.0221523286\C, 0, 5.9494223588, 2.6289778242, -0.0786490578\H, 0, 5.8842680297, 2.547441648, 2.0864256645\C, 0, 5.1422635386, 0.6573468508, -1.268883495\H, 0, 4.5230778294, -0.9750044578, 0.0012492047\C, 0, 5.6783349656, 1.9604476642, -1.2823319407\H, 0, 6.3886180774, 3.6311928312, -0.1007651692\H, 0, 5.9004156746, 2.4468381931, -2.2376452653\C, 0, 3.1528880794, -0.935762366, -4.25034327

88\H,0,2.1332010613,-0.8659543833,-4.6641543311\H,0,3.8617788435,-0.66  
84673619,-5.0524474592\H,0,3.3352079679,-1.9795262397,-3.9534814306\C,  
0,2.9827913549,1.6304751836,3.3522353297\H,0,1.9470277076,1.7312130272  
,3.7105530182\H,0,3.6604640846,1.9629525688,4.1575207646\H,0,3.1040987  
034,2.3055834482,2.4933838711\H,0,5.0268778459,-1.1681244147,-2.395983  
7744\H,0,-1.4659615897,-4.9094376174,-2.4663632036\C,0,-1.439092031,-4  
.0836047832,3.4232298037\H,0,-2.105537998,-4.4246707134,4.2342792908\H  
,0,-1.5185527777,-4.7901137468,2.5846810773\H,0,-0.4028312424,-4.11673  
8428,3.7920641869\C,0,-3.5936260356,-3.4616852772,-1.2355704299\C,0,-3  
.3881665507,-2.7907111776,-0.0174403107\C,0,-4.0811559105,-4.782319003  
2,-1.1913174816\C,0,-3.6115606775,-3.3985316857,1.2304103634\H,0,-3.02  
92971085,-1.7607856739,-0.042564702\C,0,-4.3367686409,-5.401520874,0.0  
416438498\H,0,-4.2723989754,-5.323340542,-2.1235496677\C,0,-4.09905462  
83,-4.7201070197,1.2450312037\H,0,-4.7280803915,-6.4230773442,0.064993  
8074\H,0,-4.3049020343,-5.2136354086,2.2002130976\C,0,-3.1649920283,1.  
2477193332,0.2244839421\C,0,-2.5246299194,2.9287709271,-1.8084967626\C  
,0,-2.057714397,2.2530302281,0.0077864445\C,0,-4.2435736967,1.42929289  
7,-0.8618278775\H,0,-3.5820003645,1.3338091024,1.2411046473\H,0,-2.706  
8668053,0.2538195239,0.1507454092\H,0,-3.0252646873,3.892452197,-1.963  
0154164\H,0,-1.5209504904,2.9208799314,-2.2465034576\H,0,-4.9200542176  
,2.2637726803,-0.6089955787\H,0,-4.8619082758,0.5242512695,-0.97571047  
99\C,0,-3.444871365,1.7597135161,-2.1338864082\H,0,-4.1061794989,2.025  
4354425,-2.9784527595\H,0,-2.8413078741,0.8828486184,-2.4175201734\\Ve  
rsion=EM64L-G09RevA.01\State=1-A\HF=-2818.1310832\RMSD=7.404e-09\Dipol  
e=-2.4416878,2.2262596,-0.5564003\Quadrupole=-0.6801386,-3.6931581,4.3  
732967,-6.496901,-0.4589403,-3.3274299\PG=C01 [X(C50H57N1O8Rh2)]\@

### **<sup>3</sup>IN8**

1\1\GINC-A726\SP\UBPW91\GenECP\C50H57N1O8Rh2(3)\SIOC001\23-Jun-2016\0\  
\#p genecp bpw91 geom=check scrf=(iefpcm,smd,solvent=chlorobenzene)\T  
itle Card Required\0,3\Rh,0,0.0049419443,0.0237001735,0.0175170841\Rh  
,0,0.003019648,0.0573829233,2.43766917\O,0,2.0491895472,0.0346282462,0  
.0608338029\C,0,2.6518070316,0.028227206,1.1911837216\O,0,2.0755748617  
,0.0288057496,2.3435460632\O,0,0.0416748382,-2.0337248192,0.0603107949  
\C,0,0.0504104411,-2.6104973505,1.207393536\O,0,0.0291252988,-2.013256  
971,2.3456074442\O,0,-2.0515040868,0.0461762706,0.0322665613\C,0,-2.64  
64122633,0.0658753533,1.1689142924\O,0,-2.0678058745,0.0649911631,2.31  
67703192\O,0,0.0009498704,2.0653744639,0.0294702412\C,0,-0.0118550725,  
2.6887577212,1.1487196403\O,0,-0.02584102,2.1337644623,2.3123601068\C,  
0,-0.6546213291,-0.6778606049,5.38505796\C,0,-0.248716578,-0.423478708  
6,6.7593980634\C,0,-1.6576366589,-1.6847186528,5.1362208235\C,0,0.7581  
787781,0.6334804735,7.0936958086\C,0,-0.7973310906,-1.2207283129,7.773  
5717802\C,0,-2.1935267684,-2.4240819216,6.1829298644\H,0,-1.967004478,  
-1.8529634383,4.1050312302\C,0,-1.7628340961,-2.2058143442,7.507911878  
6\H,0,-0.464490957,-1.0516716625,8.8021293775\H,0,-2.9486903204,-3.186

5165499,5.9697094221\H,0,-2.1812346056,-2.7947711086,8.3285611184\N,0,  
-0.0793240126,-0.0005065476,4.3879768734\C,0,2.0490351969,0.1267877898  
,7.6593473966\C,0,2.8284462622,-0.8016743989,6.9332844586\C,0,2.496474  
099,0.5137593956,8.9421505491\C,0,4.0289935123,-1.2982071308,7.4585541  
094\H,0,2.4868450619,-1.1234437633,5.9454320962\C,0,3.6955247941,0.013  
9149644,9.4696983668\H,0,1.8846180551,1.1998461114,9.5352335336\C,0,4.  
4695946087,-0.8908392891,8.7276464181\H,0,4.6224812619,-2.0088161464,6  
.8752150316\H,0,4.0203949783,0.3253719986,10.4671662548\H,0,5.40469799  
32,-1.2820996969,9.1388230281\C,0,4.1959371276,-0.0034334761,1.1919107  
662\C,0,-0.0330409609,4.2325660159,1.1119668336\C,0,4.7389608193,0.009  
7920664,-0.2495057496\H,0,5.8409293017,-0.0385415226,-0.2248440434\H,0  
,4.3691671026,-0.8551251739,-0.8207948167\C,0,1.1804509122,4.792683868  
6,1.9375945347\H,0,1.1165117357,5.8941145816,1.88391917\H,0,1.03056359  
06,4.5106680658,2.9927860378\C,0,-1.3426824434,4.7077952353,1.79088649  
93\H,0,-1.4126122299,4.3406683224,2.8256510768\H,0,-1.3748860666,5.810  
2269785,1.8058622479\H,0,-2.2263488273,4.3525377985,1.2356052343\C,0,4  
.6451440713,-1.301224985,1.9104412228\H,0,5.7466613725,-1.3414392208,1  
.9510547095\H,0,4.2547415509,-1.3438290047,2.9381387318\H,0,4.29522070  
47,-2.194902354,1.3677631374\C,0,4.7429500233,1.2221475441,2.009688010  
7\H,0,4.4369748047,1.0907623019,3.0606577273\H,0,5.8450315215,1.153546  
4873,1.9811319418\C,0,0.1017940839,-4.1548501095,1.2224289851\C,0,-4.1  
912405976,0.1064382639,1.1538011073\C,0,-1.1537379475,-4.716922312,0.4  
615487936\H,0,-1.0933717006,-5.817896055,0.5262729014\C,0,-4.728258763  
9,-1.163912328,0.3985579334\H,0,-5.8308866399,-1.11051527,0.4368223349  
\H,0,-4.4361521264,-1.0730474523,-0.6607115243\C,0,-4.2477963378,-2.49  
79217384,0.9360500807\C,0,-4.9646204366,-3.2224166858,1.9088967133\C,0  
, -3.0361731017,-3.0355436125,0.4637478833\C,0,-4.4641981222,-4.4379246  
459,2.3993693475\H,0,-5.9242393861,-2.8418712073,2.2727921933\C,0,-2.4  
993246693,-4.2344082422,0.9679123375\H,0,-2.48834266,-2.498826337,-0.3  
147684321\C,0,-3.2362990039,-4.9382889388,1.9408156422\H,0,-5.03830075  
24,-5.0022412537,3.1405333721\H,0,-2.8557425681,-5.8883130914,2.329019  
1367\C,0,1.369748532,-4.5988896403,0.450407183\H,0,2.283611241,-4.2511  
456556,0.9594788956\H,0,1.4089395017,-5.7002124959,0.4029188662\H,0,1.  
3716272523,-4.2024248139,-0.5758217797\C,0,0.1569721965,-4.6938733966,  
2.664599909\H,0,0.212986512,-5.7955702128,2.6411003412\H,0,1.044064097  
2,-4.3162628625,3.1953243106\H,0,-0.7275608743,-4.4018495353,3.2481559  
344\C,0,-4.627705839,1.360292732,0.3547302547\H,0,-5.7279676761,1.3907  
147755,0.2827384201\H,0,-4.2975409741,2.2840813183,0.8577224757\H,0,-4  
.2090720493,1.3507020799,-0.6627403555\C,0,-4.7591135958,0.1772665343,  
2.5836238649\H,0,-4.3867450993,1.0665641982,3.1143573556\H,0,-5.859717  
9178,0.2391437386,2.5371324478\H,0,-4.4849581886,-0.7057928863,3.17803  
3515\H,0,-1.050163756,-4.4492357495,-0.6031642605\H,0,4.442172574,0.92  
11297451,-0.7881869304\C,0,0.0126985342,4.7401520383,-0.3419197407\H,0  
, -0.022717991,5.8429415266,-0.3451092533\H,0,0.9297383257,4.4196162811  
, -0.8565439442\H,0,-0.8463534424,4.3671678553,-0.9199430168\C,0,4.2903

133455,2.5836797296,1.5186496315\C,0,3.0621347758,3.106947517,1.963408  
5193\C,0,5.0493720767,3.3435072819,0.6069796509\C,0,2.5497961471,4.325  
7496576,1.4820027912\H,0,2.4828326744,2.5423006065,2.6979747253\C,0,4.  
5742939768,4.5797790333,0.1450509996\H,0,6.0204157809,2.9708382455,0.2  
655710774\C,0,3.328725134,5.064871656,0.5700265122\H,0,5.1786723765,5.  
1689127359,-0.551227347\H,0,2.9634651495,6.0279906997,0.199571197\C,0,  
0.481089912,1.9559901653,6.9335575187\C,0,-0.8710211589,2.5278746766,6  
.505608942\C,0,1.436818101,3.1203377076,7.1678806438\C,0,-0.6538304989  
,4.0570324903,6.4023229582\H,0,-1.6255518801,2.293454018,7.2803970996\  
H,0,-1.2374678175,2.0892361699,5.5649496005\H,0,2.1534960576,2.9614749  
257,7.9853102891\H,0,2.0385037383,3.2654147812,6.2479261593\H,0,-1.563  
0624174,4.6354115676,6.6332492687\H,0,-0.3487338314,4.3215224372,5.374  
4535227\C,0,0.5125213266,4.3389961114,7.3713413601\H,0,0.1422455951,4.  
3601684058,8.4126083761\H,0,1.0174217887,5.2998177336,7.1797207848\\Ve  
rsion=ES64L-G09RevD.01\State=3-A\HF=-2818.1052147\S2=2.02666\S2-1=0.\S  
2A=2.000381\RMSD=5.804e-09\Dipole=-0.3842014,0.0269528,0.0151076\Quadr  
upole=5.9249406,7.1633539,-13.0882945,-6.5894509,-3.4369229,-0.7580761  
\PG=C01 [X(C50H57N1O8Rh2)]\@

### **<sup>3</sup>TS14**

1\1\GINC-SHI\_02\SP\UBPW91\GenECP\C50H57N1O8Rh2(3)\YIN\22-Jul-2016\0\#\#  
p genecp bpw91 geom=check scf=(maxcycle=256) scrf=(iefpcm,smd,solvent=  
chlorobenzene)\Title Card Required\0,3\Rh,0,-1.0397004614,-2.2243620  
314,0.8485533524\Rh,0,-0.188016908,-0.1835703339,-0.1646140552\O,0,0.5  
018072157,-2.1605478384,2.1834913639\C,0,1.3593237337,-1.2117548277,2.  
1081031948\O,0,1.3359503262,-0.2497513765,1.2496834498\O,0,-2.15952709  
56,-1.0758867313,2.1401386133\C,0,-2.0892870967,0.2004664765,2.0353189  
09\O,0,-1.370018051,0.8454843879,1.1873513746\O,0,-2.5661161159,-2.256  
8294879,-0.5235287813\C,0,-2.6148477223,-1.3177805805,-1.3963985198\O,  
0,-1.7832782362,-0.3414400281,-1.4911165021\O,0,0.1102376807,-3.303240  
0589,-0.4519958411\C,0,0.8308074966,-2.6908328082,-1.3152227069\O,0,0.  
9223008553,-1.4117058417,-1.448459031\C,0,-0.3104149454,2.710810119,-1  
.1211899618\C,0,0.482835214,3.9209415541,-1.2275520525\C,0,-1.73471331  
5,2.8249980188,-1.1868681398\C,0,1.9169063229,3.6578115555,-1.10647118  
66\C,0,-0.1446332487,5.1682251492,-1.361603916\C,0,-2.3252290266,4.078  
904555,-1.3472272476\H,0,-2.3408091729,1.9240058416,-1.1114343354\C,0,  
-1.5445562779,5.2512123968,-1.4329738393\H,0,0.46598736,6.0734449842,-  
1.4230805532\H,0,-3.4158583838,4.1493086188,-1.396397255\H,0,-2.027812  
6517,6.2239817525,-1.5582319368\N,0,0.3807807698,1.5578190538,-0.96198  
90531\C,0,2.769812059,4.5569541609,-0.310333423\C,0,2.260732552,5.2268  
370234,0.83307103\C,0,4.1112426526,4.8273187867,-0.6880430903\C,0,3.06  
15359508,6.1032925941,1.5734599922\H,0,1.2317416204,5.0326420288,1.145  
7661785\C,0,4.9082864757,5.7074251089,0.051457836\H,0,4.513250207,4.36  
2236829,-1.5920521477\C,0,4.3898664161,6.348118439,1.1889653141\H,0,2.  
6482587149,6.5947550738,2.4592875086\H,0,5.9357137229,5.9050558967,-0.

2682789009\H,0,5.0136122747,7.0366008797,1.7660145766\C,0,2.5084928291  
, -1.1995208628,3.1417781557\C,0,1.6514920292, -3.5566328643, -2.29996659  
14\C,0,2.396703199, -2.4088218514,4.0897635812\H,0,3.2094142615, -2.3645  
153419,4.8348600607\H,0,1.4364041679, -2.4058860179,4.6270827943\C,0,3.  
1741360232, -3.1936350093, -2.1802316623\H,0,3.7116817954, -3.8420697686,  
 -2.8948355784\H,0,3.3015722816, -2.1554736136, -2.5292552787\C,0,1.18505  
69493, -3.2177469059, -3.7384010535\H,0,1.308843503, -2.1461801696, -3.956  
6421909\H,0,1.7754019662, -3.7962095695, -4.4690162509\H,0,0.123622034, -  
3.4795245201, -3.8806284147\C,0,2.4048213041,0.1167762969,3.9536306861\  
H,0,3.2321446217,0.1723959317,4.6811204768\H,0,2.4561148919,0.99693720  
52,3.2952024749\H,0,1.4578358657,0.1585597232,4.5165574253\C,0,3.89146  
22525, -1.2066264549,2.3976590414\H,0,3.981835298, -0.2561616356,1.84618  
21015\H,0,4.6705764713, -1.1998638109,3.1806902739\C,0, -2.9359523657,1.  
0274026222,3.0295703501\C,0, -3.7642607398, -1.3828521596, -2.4282074269\  
C,0, -4.4403159453,0.5873652967,2.9110532357\H,0, -5.007294716,1.2035826  
091,3.6314629203\C,0, -5.1381173698, -1.4223199232, -1.6652563202\H,0, -5.  
9272400732, -1.4541895672, -2.4375686907\H,0, -5.1872541151, -2.3745919324  
, -1.1119754912\C,0, -5.3906695808, -0.2723465991, -0.708502517\C,0, -6.085  
2145071,0.8905369777, -1.0967009299\C,0, -4.9113673768, -0.3521299551,0.6  
125608262\C,0, -6.2707884457,1.9428870011, -0.187436913\H,0, -6.496190141  
,0.9659872824, -2.1085259489\C,0, -5.0504571305,0.7083587799,1.527364137  
\H,0, -4.4050393968, -1.264605874,0.9355848585\C,0, -5.7483313151,1.85962  
29339,1.1119763888\H,0, -6.8305957187,2.8323476485, -0.4923455735\H,0, -5  
.8962219789,2.6875995906,1.8126221686\C,0, -2.4461972223,0.6873161773,4  
.4607114978\H,0, -1.3986707975,1.0004912875,4.6029815259\H,0, -3.0617836  
203,1.2232564738,5.2028809867\H,0, -2.5159768423, -0.3927548152,4.660207  
7126\C,0, -2.7822464397,2.537244316,2.7725492633\H,0, -3.3819270396,3.09  
78207098,3.510119126\H,0, -1.7320693963,2.8502898547,2.8726877135\H,0, -  
3.1187645011,2.8153143764,1.7641070422\C,0, -3.6138497083, -2.7081870891  
, -3.2181928134\H,0, -4.4497997628, -2.8150722184, -3.9299854293\H,0, -2.67  
54416768, -2.7174740004, -3.7967761105\H,0, -3.6144276948, -3.5766067936, -  
2.5424589925\C,0, -3.7111477104, -0.1914910813, -3.4021739439\H,0, -2.7495  
842664, -0.1564324072, -3.9361157894\H,0, -4.5169972625, -0.2925767219, -4.  
1491985414\H,0, -3.8417063716,0.7687576167, -2.8829966519\H,0, -4.5122228  
156, -0.4587315847,3.2511373158\H,0,2.4748433692, -3.3607968999,3.545186  
3113\C,0,1.4303728985, -5.0549203474, -2.0184623445\H,0,2.0051313869, -5.  
6529376437, -2.7463999979\H,0,1.7588562839, -5.3280966423, -1.0054915683\  
H,0,0.3677903561, -5.3249286684, -2.1132786272\C,0,4.1242349368, -2.36424  
35972,1.444740129\C,0,3.6351189456, -2.2840578636,0.1288407721\C,0,4.81  
69553328, -3.5302172277,1.8256023396\C,0,3.7759294847, -3.3349469231, -0.  
7948049044\H,0,3.1191823423, -1.3747828363, -0.1854453834\C,0,4.99354869  
64, -4.5804866934,0.9121713083\H,0,5.2311194713, -3.6114875172,2.8356461  
11\C,0,4.4714936692, -4.4897486746, -0.3870711217\H,0,5.5452646288, -5.47  
57595466,1.2142531085\H,0,4.6165065875, -5.3149747832, -1.0916763333\C,0  
,2.3108096783,2.3983932942, -1.6207804489\C,0,2.0245759616,1.9439522752

, -3.0566142587\C, 0, 3.5735144338, 1.6648559009, -1.2018125434\C, 0, 3.44853  
58602, 1.9280006576, -3.659182315\H, 0, 1.3211625456, 2.6048327028, -3.58450  
61862\H, 0, 1.6090603732, 0.9228718031, -3.0563293607\H, 0, 4.1735694302, 2.2  
332433036, -0.4776253152\H, 0, 3.2597599613, 0.7400140658, -0.6904183065\H,  
0, 3.7673934594, 2.9599056739, -3.8911394818\H, 0, 3.5028423404, 1.350109722  
7, -4.5963645862\C, 0, 4.3313196702, 1.3347397402, -2.526827659\H, 0, 5.34932  
12531, 1.7567900693, -2.5346445567\H, 0, 4.4386350307, 0.2447517226, -2.6492  
040349\\Version=EM64L-G09RevA.01\State=3-A\HF=-2818.0851758\S2=2.01903  
6\S2-1=0.\S2A=2.000213\RMSD=6.102e-09\Dipole=0.5341934, 0.7802343, -0.29  
62619\Quadrupole=0.39309, -4.6421753, 4.2490853, -2.8392315, 3.9624487, 12.  
3248733\PG=C01 [X(C50H57N1O8Rh2)]\@

### **3IN9**

1\1\GINC-A744\FOpt\UBPW91\GenECP\C50H57N1O8Rh2(3)\SIOC001\23-Jun-2016\  
0\#p genecp bpw91 opt\\Title Card Required\\0, 3\Rh, -0.0165079502, 0.03  
82314328, 0.0471532995\Rh, 0.0235691077, -0.0106399293, 2.4723939619\O, 2.0  
188350825, 0.052739295, 0.0180099505\C, 2.6544156563, 0.0440724118, 1.12986  
79325\O, 2.1129940726, 0.0224541703, 2.2992224763\O, 0.0358429675, -2.01397  
32344, 0.037412207\C, 0.0843259362, -2.6326954118, 1.1608746666\O, 0.106871  
1883, -2.0732011901, 2.3178246928\O, -2.0676652846, 0.0423971246, 0.1143215  
419\C, -2.645305119, 0.021012779, 1.2606561243\O, -2.0444101506, -0.0020796  
841, 2.3963258051\O, -0.0556010834, 2.0721541312, 0.0863972705\C, -0.077833  
4017, 2.665839267, 1.2211951787\O, -0.067222358, 2.0795434547, 2.3685255919  
\C, -0.9566971888, -0.9925334, 5.2333921773\C, -0.9114469793, -0.8031646029  
, 6.665669236\C, -1.8827104613, -1.8973463093, 4.6765018502\C, 0.1352436991  
, 0.1261142081, 6.9536506748\C, -1.8561173079, -1.4459959828, 7.4875519643\  
C, -2.7883572249, -2.5662850037, 5.5278193125\H, -1.9011294947, -2.07979881  
38, 3.6061768445\C, -2.7896865614, -2.3332742147, 6.9100674024\H, -1.876743  
627, -1.2494719478, 8.5619663441\H, -3.502959644, -3.2673678111, 5.08925402  
25\H, -3.5170383722, -2.8405599933, 7.5502582183\N, -0.0295473032, -0.20072  
27932, 4.5895727895\C, 0.5330009734, 0.5258897216, 8.3020067426\C, 0.578842  
1309, -0.4502702228, 9.3397044487\C, 0.8616486295, 1.8624477099, 8.66240195  
3\C, 0.9344241552, -0.1111843163, 10.6486211031\H, 0.3735128536, -1.4941452  
597, 9.090817712\C, 1.209987073, 2.1976628747, 9.9748832637\H, 0.8060308172  
, 2.6516679873, 7.9119203462\C, 1.2502133014, 1.2166398006, 10.9790634591\H  
, 0.9757649154, -0.8920043725, 11.4141656593\H, 1.4422622035, 3.2389138862,  
10.2179093256\H, 1.5237936281, 1.4833267514, 12.0035874486\C, 4.1989791218  
, 0.0429296286, 1.0663257271\C, -0.140731468, 4.2099927796, 1.220675882\C, 4  
.6787798358, 0.0370802087, -0.3981796296\H, 5.781749938, 0.0139925153, -0.4  
21325662\H, 4.3049512446, -0.8475353491, -0.9355754121\C, 1.1232651237, 4.7  
89111874, 1.953222856\H, 1.0350061093, 5.8892122277, 1.908779001\H, 1.05742  
30791, 4.5049430838, 3.0166737891\C, -1.3976821368, 4.6442613024, 2.0154530  
763\H, -1.3790637537, 4.2484948224, 3.041850819\H, -1.445780232, 5.74515789  
84, 2.0632366208\H, -2.3180731747, 4.2880301283, 1.5242258871\C, 4.71378614  
55, -1.2260646403, 1.7903919023\H, 5.8166890816, -1.2359423928, 1.785705953

1\H,4.3685280202,-1.2613594229,2.834433825\H,4.3665779805,-2.139860182  
1,1.2807136954\C,4.7567504762,1.3007703807,1.8242642489\H,4.5145588275  
,1.1850754054,2.8936529123\H,5.8570841265,1.2598201605,1.7370519258\C,  
0.1327670617,-4.1756699265,1.106969745\C,-4.1899449928,0.0368734446,1.  
2611440289\C,-1.099072884,-4.6993563072,0.2819409121\H,-1.0270830843,-  
5.8015263937,0.2758408517\C,-4.7139854914,-1.1789636009,0.4120921293\H  
, -5.8170395184,-1.1358436548,0.4493237248\H,-4.4189041318,-1.008422486  
7,-0.6364671101\C,-4.2301814892,-2.5486966005,0.8501933709\C,-4.968431  
8085,-3.3608782285,1.7338050188\C,-3.0002833131,-3.0359810421,0.368806  
1205\C,-4.4714047792,-4.611821421,2.1304177313\H,-5.9425126187,-3.0207  
929829,2.0993568801\C,-2.4637906085,-4.2686582324,0.7866590871\H,-2.43  
98742149,-2.4336047568,-0.3499366656\C,-3.2233586487,-5.0598480902,1.6  
712110087\H,-5.0635945251,-5.2450957496,2.7979936418\H,-2.8449947617,-  
6.0367266464,1.988570588\C,1.4233507071,-4.5827216768,0.3506761729\H,2  
.3219327813,-4.2583242563,0.9009078754\H,1.4659985297,-5.6805512568,0.  
2526786339\H,1.4534353381,-4.1393339008,-0.6560437077\C,0.1459795033,-  
4.7828741487,2.5218653823\H,0.2089577823,-5.8819336048,2.44841259\H,1.  
0125452971,-4.4262940311,3.0987816569\H,-0.7603796766,-4.523752772,3.0  
871538727\C,-4.6511979187,1.3414131224,0.5624342217\H,-5.7525138009,1.  
362491582,0.5051770388\H,-4.3264057382,2.228769626,1.1302853485\H,-4.2  
4516258,1.4137606126,-0.4577265514\C,-4.7489455615,-0.0099349814,2.694  
6798732\H,-4.3922259239,0.8456291196,3.2877090282\H,-5.851044538,0.029  
8579213,2.6595966605\H,-4.4497264553,-0.9263969553,3.2220258013\H,-0.9  
743532734,-4.3613560635,-0.7600607734\H,4.3367841876,0.9298052208,-0.9  
410430458\C,-0.2222045376,4.7465925222,-0.2215703166\H,-0.2931361172,5  
.8474897629,-0.198342812\H,0.6631979796,4.4658872451,-0.8097413725\H,-  
1.1098747747,4.3560745683,-0.7419987444\C,4.2433549683,2.6422024168,1.  
3369343261\C,3.0293803839,3.1399813542,1.8430333017\C,4.9332540487,3.4  
167144632,0.3841286063\C,2.4653765074,4.3495364818,1.3997411063\H,2.50  
08099028,2.5603301887,2.6025317278\C,4.4044558439,4.6415182708,-0.0503  
649793\H,5.8931740935,3.0675564665,-0.0092823889\C,3.1763557667,5.1039  
061875,0.4462448033\H,4.9557519154,5.2425397439,-0.7796901129\H,2.7749  
655617,6.0619527002,0.1009686117\C,0.8407484081,0.4426039578,5.6267993  
94\C,1.1473628216,1.9455029984,5.3422605491\C,2.2737927239,-0.20553810  
92,5.6043569798\C,2.6227503415,2.208426213,5.7667952494\H,0.418428914,  
2.5999328596,5.8454819709\H,1.0130458772,2.1154941892,4.2667072596\H,2  
.2839744737,-1.1838838986,6.1114482742\H,2.5497115611,-0.3608575972,4.  
5498494131\H,2.7030867078,2.9792732087,6.5499919867\H,3.2004375962,2.5  
802520444,4.9050146967\C,3.1845044966,0.8465894187,6.2556580438\H,3.11  
88422374,0.7793476598,7.3531878799\H,4.243942437,0.7037664696,5.984796  
36\\Version=ES64L-G09RevD.01\State=3-A\HF=-2817.3658126\S2=2.009437\S2  
-1=0.\S2A=2.000055\RMSD=1.132e-09\RMSF=5.406e-06\Dipole=0.0826825,-0.0  
462513,0.3806217\Quadrupole=3.6828516,6.8443078,-10.5271594,0.1170923,  
-1.4265211,-1.947374\PG=C01 [X(C50H57N108Rh2)]\@



**3TS17**

1\1\GINC-A736\FTS\UBPW91\GenECP\C50H57N108Rh2(3)\SI0C001\15-Jul-2016\0  
\\#p opt=(calcf,ts,noeigen) genecp bpw91\Title Card Required\0,3\rh  
, -1.1253587816, -2.3556980388, -0.1604383694\rh, -0.1597158753, -0.1456967  
315, 0.0627082799\O, 0.1601425419, -3.0422471475, 1.2583905897\C, 0.9902252  
844, -2.23140646, 1.8004744408\O, 1.0974003374, -0.9767593169, 1.5228351583  
\O, -2.4611124095, -1.88942236, 1.3271287587\C, -2.3971004211, -0.725419049  
4, 1.8658018375\O, -1.557364455, 0.1955585548, 1.5507840354\O, -2.393030235  
1, -1.6300650038, -1.602356602\C, -2.3087439257, -0.3877390831, -1.91626196  
65\O, -1.4867920281, 0.4550701772, -1.4022492683\O, 0.2295287691, -2.774721  
5144, -1.6219370642\C, 1.0753898956, -1.8759141883, -1.9672419991\O, 1.1649  
325809, -0.696818335, -1.4546696809\C, -0.310422872, 2.9596357845, 0.111181  
9951\C, 0.4541345554, 4.1551428126, -0.078734337\C, -1.7064692844, 3.009306  
8298, 0.1910863851\C, 1.8428111311, 3.7554127719, -0.0928982076\C, -0.19984  
75073, 5.3855155407, -0.2576455408\C, -2.3454832658, 4.2611132942, 0.048514  
0593\H, -2.2877678634, 2.1057330871, 0.3592885198\C, -1.6067834046, 5.42988  
99929, -0.1857924789\H, 0.3700121632, 6.2956521605, -0.4614803079\H, -3.435  
7997873, 4.3069545671, 0.1114198025\H, -2.1230305375, 6.3853165558, -0.3156  
401912\N, 0.5474061021, 1.8494420043, 0.1953596375\C, 2.9795669651, 4.64516  
76484, -0.3353310872\C, 3.0266538651, 5.9327846365, 0.2639260158\C, 4.04258  
80373, 4.2876669986, -1.2053496953\C, 4.0854956553, 6.8118708261, 0.0107053  
351\H, 2.2370084569, 6.221897005, 0.9618403243\C, 5.0967317223, 5.171812746  
7, -1.4606578232\H, 4.0128112298, 3.3218909042, -1.7150246578\C, 5.12642609  
56, 6.4384106078, -0.854495302\H, 4.1014781527, 7.7918968067, 0.4968622676\H,  
5.8952729547, 4.8746039927, -2.1469316351\H, 5.9512319347, 7.1274823958,  
-1.0562217313\C, 1.9300988277, -2.8032062882, 2.8868553394\C, 2.0595772686  
, -2.2296273495, -3.1064948084\C, 1.6157843159, -4.2895698395, 3.1446889376  
\H, 2.2821182265, -4.6709416897, 3.9372676748\H, 0.5749856382, -4.423692494  
9, 3.4765961966\C, 3.5364920201, -2.1562621531, -2.5746176829\H, 4.18889790  
35, -2.4444654395, -3.4180423849\H, 3.7598221732, -1.1015096424, -2.3424018  
963\C, 1.8977883206, -1.1738758338, -4.228582933\H, 2.0788331414, -0.156942  
5155, -3.8496516773\H, 2.6137734034, -1.3800781682, -5.0419698619\H, 0.8825  
781533, -1.2063257036, -4.6569983075\C, 1.7207290363, -1.9922905032, 4.1899  
796573\H, 2.4037754227, -2.362535968, 4.9729575531\H, 1.9167913262, -0.9211  
585569, 4.0341385819\H, 0.6893056429, -2.1041658778, 4.5626407369\C, 3.4252  
289123, -2.6277129761, 2.4365597095\H, 3.6468696532, -1.5476325838, 2.41697  
16818\H, 4.0478627126, -3.0679226756, 3.2357334391\C, -3.4087759793, -0.422  
1429279, 2.9934843008\C, -3.2709097843, 0.1211303428, -3.0120740292\C, -4.8  
665078396, -0.6420666898, 2.4466019454\H, -5.5540279399, -0.402667194, 3.27  
72133693\C, -4.7506330258, -0.186785787, -2.5786021536\H, -5.4005626281, 0.  
2021987314, -3.3824175323\H, -4.8747187603, -1.2821288422, -2.5629677135\C  
, -5.1794185356, 0.3846233593, -1.2402856006\C, -5.8261412577, 1.6312848821  
, -1.1277273513\C, -4.9232782312, -0.3414388797, -0.0619814657\C, -6.182987  
9559, 2.1340885753, 0.1327385979\H, -6.0645497862, 2.2028251641, -2.0302422  
579\C, -5.2355102618, 0.1628570244, 1.2146522972\H, -4.4583413691, -1.32672

62341,-0.1405605012\C,-5.8806456545,1.4127878506,1.2977849975\H,-6.705  
1654959,3.0927800693,0.2077345311\H,-6.1620412238,1.8154085309,2.27601  
3922\C,-3.1641581413,-1.4428198226,4.1345388126\H,-2.1621015038,-1.309  
3928374,4.5744869976\H,-3.9070829846,-1.2904112182,4.9354700601\H,-3.2  
487287248,-2.4773219749,3.7692287197\C,-3.2326988579,1.0093857808,3.53  
25499363\H,-3.9434217183,1.1785209804,4.359467762\H,-2.2138668723,1.16  
63480798,3.9176411549\H,-3.4171018579,1.7664676716,2.757231669\C,-2.97  
60753464,-0.6777358356,-4.3078533088\H,-3.6799666096,-0.3734303436,-5.  
1007962803\H,-1.9541982106,-0.477219618,-4.6696162251\H,-3.0807764011,  
-1.7606515277,-4.1425049288\C,-3.0733558872,1.6252325454,-3.2736654313  
\H,-2.0443317461,1.8388274593,-3.600208401\H,-3.7627918056,1.950984447  
4,-4.0712966047\H,-3.267411478,2.2278793826,-2.3754510978\H,-4.9839832  
284,-1.7161802242,2.2277988331\H,1.7611695773,-4.8996499598,2.24180278  
6\C,1.7594038652,-3.6350021344,-3.6627641921\H,2.4502907022,-3.8526434  
969,-4.4951220552\H,1.8832709784,-4.4113285058,-2.894143218\H,0.729336  
3055,-3.7004441551,-4.0445727639\C,3.7895554591,-3.237930014,1.0961949  
348\C,3.5740621249,-2.4966434446,-0.0783313566\C,4.3376174028,-4.52973  
61285,0.9733136826\C,3.8451294056,-3.0093526898,-1.3587682201\H,3.1774  
104806,-1.4838301571,0.0031157149\C,4.6420817361,-5.0525010163,-0.2928  
572724\H,4.5393339886,-5.1232562419,1.8706633337\C,4.3931578492,-4.303  
4191092,-1.4531753122\H,5.0815696277,-6.0510256748,-0.3759113247\H,4.6  
387410033,-4.721003304,-2.4347887745\C,1.8531306153,2.3379195264,0.211  
0892862\C,3.0309852901,1.3945772984,0.1132482364\C,2.2422889681,2.3583  
606646,2.4741360421\C,4.2221839331,1.7717440465,1.0311798318\H,3.36453  
14422,1.2947210207,-0.9348831522\H,2.6504033879,0.408218516,0.40542160  
67\H,1.6301254539,3.195699067,2.8196504035\H,1.8300133892,1.363558013,  
2.6645363805\H,4.9484576925,2.4072869878,0.4998794032\H,4.760432776,0.  
8466945044,1.298699999\C,3.7205745787,2.5202186346,2.3078327254\H,3.96  
50728091,3.5917612863,2.2265290599\H,4.2730533853,2.1458333319,3.19394  
77391\\Version=ES64L-G09RevD.01\State=3-A\HF=-2817.3344207\S2=2.016567  
\S2-1=0.\S2A=2.00013\RMSD=3.807e-09\RMSF=6.143e-06\Dipole=0.4025592,0.  
4391906,0.0719812\Quadrupole=1.6249914,-5.5482316,3.9232402,-5.2936237  
, -2.8346127,-1.1318149\PG=C01 [X(C50H57N1O8Rh2)]\@

### **<sup>3</sup>IN10**

1\1\GINC-SHI\_02\FOpt\UBPW91\GenECP\C50H57N1O8Rh2(3)\YIN\24-Jun-2016\0\  
\#p opt genecp bpw91\\Title Card Required\\0,3\Rh,-0.0857601376,0.0941  
779764,-0.0365697068\Rh,0.0777094847,-0.1653736384,2.3638384257\O,1.94  
05522871,0.0796125974,-0.1598469191\C,2.6371596628,-0.0550090296,0.907  
0032972\O,2.158973316,-0.1882364597,2.0970372616\O,-0.0723766112,-1.95  
28341422,-0.2205004194\C,0.0012667078,-2.6657538157,0.8451054611\O,0.0  
698269413,-2.2078586272,2.04468202\O,-2.1298336158,0.1223608923,0.1175  
831448\C,-2.6483996951,0.0199232473,1.2884846917\O,-1.9900765703,-0.10  
40160837,2.3841027908\O,-0.0820246815,2.1163708992,0.2087991845\C,-0.0  
060178767,2.6039452861,1.3921229409\O,0.0791838852,1.9186263185,2.4800

822503\C,-0.9534386858,-1.1936272225,5.1234829288\C,-0.9830913755,-0.8  
918460849,6.5187568818\C,-1.8017478809,-2.1620983294,4.5828215921\C,0.  
0274737237,0.1187617104,6.7336994598\C,-1.9140888032,-1.5275754115,7.3  
595852775\C,-2.7031342204,-2.8207956179,5.447434492\H,-1.7674226656,-2  
.4074313155,3.5234996857\C,-2.7688878824,-2.5015217626,6.8134735518\H,  
-1.9777976552,-1.2670326413,8.4194343154\H,-3.3663387874,-3.5852053919  
,5.0340984394\H,-3.4886826666,-3.0126160505,7.4589906115\N,0.027949666  
, -0.3987787981,4.4853597804\C,0.3532827322,0.7433709944,8.0193217761\C  
,0.4405768631,-0.0420550226,9.19783507\C,0.5592536964,2.1408935142,8.1  
392784264\C,0.7281715678,0.5436860129,10.4359408448\H,0.3147454071,-1.  
1249867359,9.1236044345\C,0.8409863867,2.724164258,9.379638157\H,0.462  
3227905,2.7726109672,7.2530358039\C,0.9282748606,1.9297521904,10.53448  
83371\H,0.8031560684,-0.0859396886,11.3274408197\H,0.9848637463,3.8064  
964338,9.4473342529\H,1.1500034641,2.3875059391,11.5025951905\C,4.1744  
94763,-0.0738647032,0.742521181\C,-0.0373675027,4.1438048174,1.5298613  
287\C,4.5589721134,0.0435897862,-0.7454465539\H,5.6576302596,0.0063071  
051,-0.8415941517\H,4.1344760826,-0.7850864909,-1.3322220633\C,1.28401  
88955,4.6396367524,2.2201957166\H,1.2174797383,5.7408916477,2.27326226  
56\H,1.2819676242,4.2669061792,3.258148214\C,-1.2300137854,4.521112293  
9,2.4442026647\H,-1.1515974852,4.0308869261,3.4260573\H,-1.2528448828,  
5.6134510274,2.5957094057\H,-2.1876515923,4.2245287449,1.9857071685\C,  
4.7082654875,-1.4116617544,1.3127855778\H,5.8084491393,-1.4360955065,1  
.2380900163\H,4.4270570355,-1.5416804142,2.3682103097\H,4.3127252263,-  
2.2679609498,0.7421290781\C,4.8095105211,1.1033632911,1.566450599\H,4.  
6328805926,0.9014746268,2.6358156233\H,5.9007453385,1.046846532,1.4052  
203945\C,0.0210369623,-4.1988417983,0.6553288002\C,-4.1901128205,0.062  
037665,1.3750447042\C,-1.2623380792,-4.6327518902,-0.1429564731\H,-1.2  
147769507,-5.7316883421,-0.2425134761\C,-4.7867977567,-1.0731095089,0.  
465206982\H,-5.8847742717,-1.0143657593,0.5696674005\H,-4.5473298725,-  
0.8248181049,-0.5819107891\C,-4.3094376465,-2.4810852502,0.7670134985\  
C,-5.0151049767,-3.347180933,1.6254660362\C,-3.1192426979,-2.949763676  
5,0.1796517\C,-4.5238237704,-4.6335392318,1.895659357\H,-5.9592898026,  
-3.0191622493,2.0715118156\C,-2.587518671,-4.220348714,0.4694876154\H,  
-2.5849481618,-2.3010674241,-0.5181109149\C,-3.3131327879,-5.065199530  
5,1.332599696\H,-5.0909166502,-5.3066566375,2.5458216792\H,-2.93824538  
66,-6.0700313909,1.5515643306\C,1.2632244447,-4.5535951286,-0.20183630  
46\H,2.1947738842,-4.2956842048,0.3283765997\H,1.2784657561,-5.6380723  
475,-0.4023977069\H,1.2504620035,-4.018516083,-1.1632178563\C,0.100793  
4187,-4.9295453008,2.0083197261\H,0.1518711378,-6.0178564683,1.8334556  
833\H,0.9985402592,-4.6294998956,2.5695220433\H,-0.774374187,-4.721800  
8317,2.6401795074\C,-4.6587987146,1.4266334688,0.8075798585\H,-5.76099  
56294,1.4712353952,0.8096423763\H,-4.287070918,2.2594319181,1.42703312  
93\H,-4.3037243053,1.5744528393,-0.2235341297\C,-4.671378586,-0.088313  
1864,2.8297324385\H,-4.267889171,0.7134323018,3.4664017174\H,-5.772942  
9567,-0.0296434784,2.8577021714\H,-4.3610093812,-1.0471727587,3.267736

6454\H,-1.1843111782,-4.2110739592,-1.1585910984\H,4.2016000606,0.9856  
554419,-1.1849453581\C,-0.2058817174,4.807860144,0.1498679917\H,-0.262  
3177426,5.9026018661,0.2762877138\H,0.6362647194,4.5764320662,-0.51802  
71161\H,-1.1299890525,4.4706663308,-0.3434914708\C,4.3045396481,2.4936  
285356,1.2281840984\C,3.1320024749,2.9681087772,1.8413858588\C,4.96321  
82236,3.3389104581,0.3137605284\C,2.5779837151,4.2256936548,1.54529208  
56\H,2.6282587677,2.3365332216,2.574159096\C,4.4431688007,4.609168146,  
0.0220094564\H,5.8920531726,3.0077981879,-0.1614367464\C,3.2556638818,  
5.0499801506,0.6261246477\H,4.9703156986,5.2632798431,-0.6789500582\H,  
2.862196814,6.0445273793,0.3929586821\C,0.6320632746,0.3493626858,5.45  
57888564\C,1.8424876963,1.1933535554,5.162731016\C,2.9042775994,-1.741  
5388014,6.1053898055\C,3.1178550546,0.8219805004,5.9601934163\H,1.6179  
306373,2.2588838438,5.3484469232\H,2.0555086026,1.1029413984,4.0894075  
824\H,2.8028154073,-1.9343517759,7.176657129\H,2.3220839918,-2.3608325  
596,5.4217434339\H,2.9237740632,0.8877886275,7.0434124705\H,3.88452248  
84,1.5859386275,5.732393257\C,3.7081745665,-0.5785334778,5.6253292561\  
H,4.719727887,-0.6111971963,6.0808632107\H,3.8502923901,-0.6444138642,  
4.533099953\\Version=EM64L-G09RevA.01\State=3-A\HF=-2817.3465581\S2=2.  
008954\S2-1=0.\S2A=2.00005\RMSD=5.946e-09\RMSF=4.974e-06\Dipole=0.0485  
772,0.197336,0.6341879\Quadrupole=0.6743959,5.6262078,-6.3006037,1.489  
6854,-3.0732519,3.2017694\PG=C01 [X(C50H57N1O8Rh2)]\@

### **<sup>3</sup>TS18**

1\1\GINC-SHI\_02\SP\UBPW91\GenECP\C50H57N1O8Rh2(3)\YIN\01-Sep-2016\0\#\#  
p genecp bpw91 scf=(maxcycle=256) scrf=(iefpcm,smd,solvent=chlorobenze  
ne)\Title Card Required\0,3\Rh\Rh,1,2.44557604\O,1,2.03338567,2,89.8  
1415578\C,3,1.28077628,1,119.8214897,2,0.51667698,0\O,4,1.28792761,3,1  
24.74115718,1,-0.29633319,0\O,1,2.06112102,3,88.72658711,4,-87.8867330  
1,0\C,6,1.28260107,1,119.25067154,3,91.16823062,0\O,7,1.28704986,6,125  
.49202395,1,-1.09511941,0\O,1,2.04247779,3,179.40844266,4,137.00841563  
,0\C,9,1.28775178,1,118.14826894,3,-136.08583766,0\O,10,1.27947103,9,1  
25.0459371,1,-0.41477335,0\O,1,2.04321701,3,90.35500847,4,89.88002413,  
0\C,12,1.28155415,1,118.85905542,3,-90.58659504,0\O,13,1.28761144,12,1  
25.75465219,1,0.66834676,0\C,11,3.03074144,10,161.91274065,9,-144.2568  
0321,0\C,15,1.429438,11,125.01349322,10,-86.05066754,0\C,15,1.39839231  
,11,78.40044152,10,34.1305294,0\C,16,1.44602433,15,106.35638433,11,-83  
.84898881,0\C,16,1.40905164,15,119.73867606,11,95.14555416,0\C,17,1.40  
717179,15,118.15676637,11,-123.52010054,0\H,17,1.08993323,15,120.55511  
366,11,55.98239036,0\C,19,1.40262099,16,118.90182426,15,2.97140964,0\H  
,19,1.09352055,16,120.56635606,15,-177.20008794,0\H,20,1.09327359,17,1  
19.07720933,15,-179.62024825,0\H,22,1.09386197,19,119.5886616,16,178.9  
5408237,0\N,15,1.41190999,11,73.54699106,10,171.08861772,0\C,18,1.4676  
6694,16,126.65090518,15,-178.44066065,0\C,27,1.41814899,18,120.6867528  
7,16,42.78062137,0\C,27,1.41754744,18,121.56789966,16,-136.59254209,0\  
C,28,1.39986576,27,121.040587,18,-179.91363636,0\H,28,1.0932196,27,119

.03785387,18,1.88829735,0\C,29,1.39984461,27,121.09652634,18,-180.,0\H  
,29,1.0933565,27,118.99157749,18,2.222855,0\C,30,1.40408958,28,120.384  
29671,27,0.09806481,0\H,30,1.09417815,28,119.57862686,27,-179.37600991  
,0\H,32,1.09414384,29,119.60749552,27,-179.5156625,0\H,34,1.09363398,3  
0,120.30111936,28,-179.98723693,0\C,4,1.54617525,3,117.13083785,1,178.  
92885423,0\C,13,1.54664916,12,117.33001009,1,-178.73486348,0\C,38,1.54  
158812,4,110.51873319,3,-1.45512155,0\H,40,1.10353395,38,109.29592761,  
4,-178.57059688,0\H,40,1.10061499,38,111.19121977,4,-59.21181044,0\C,3  
9,1.57126831,13,109.45014142,12,-119.69729673,0\H,43,1.10459287,39,106  
.59075638,13,179.31520799,0\H,43,1.10265343,39,107.80165731,13,-66.129  
14718,0\C,39,1.54917511,13,108.12568343,12,122.69350803,0\H,46,1.10014  
067,39,111.3177388,13,57.13645816,0\H,46,1.1031145,39,109.79156387,13,  
177.59353223,0\H,46,1.10236135,39,110.92193348,13,-63.38601033,0\C,38,  
1.5488456,4,108.33830579,3,-121.42785039,0\H,50,1.10292876,38,109.7604  
8851,4,-178.7132119,0\H,50,1.10006204,38,111.51418087,4,-58.53682174,0  
\H,50,1.1023952,38,110.97075644,4,62.27316462,0\C,38,1.57081336,4,109.  
68601457,3,120.53173546,0\H,54,1.1030228,38,107.9925537,4,66.77452293,  
0\H,54,1.10459193,38,106.55894938,4,-178.78195759,0\C,7,1.54636788,6,1  
16.5004109,1,179.78271256,0\C,10,1.54497023,9,116.57445769,1,178.89157  
024,0\C,57,1.57252485,7,109.11039726,6,-56.14570212,0\H,59,1.10472488,  
57,106.55886639,7,-179.48984813,0\C,58,1.57253295,10,109.07317921,9,56  
.75850851,0\H,61,1.10461644,58,106.53008638,10,178.99226615,0\H,61,1.1  
0260157,58,107.8054429,10,-66.32833235,0\C,61,1.51695775,58,115.645558  
94,10,56.25171933,0\C,64,1.40876266,61,122.30544942,58,92.89541876,0\C  
,64,1.4073778,61,119.4474525,58,-86.39044219,0\C,65,1.40297552,64,120.  
37602507,61,-178.45308315,0\H,65,1.09446467,64,119.73791022,61,2.27881  
773,0\C,66,1.40725806,64,122.25793514,61,176.3774315,0\H,66,1.09233663  
,64,118.83114975,61,-3.08199695,0\C,67,1.40316775,65,120.44194163,64,1  
.12622711,0\H,67,1.09426493,65,119.78527425,64,-178.64278886,0\H,71,1.  
09478397,67,119.83708279,65,179.94465676,0\C,57,1.55021476,7,107.67875  
909,6,60.86585477,0\H,74,1.10264108,57,111.01356081,7,63.83719723,0\H,  
74,1.102988,57,109.75023418,7,-177.07744883,0\H,74,1.10029535,57,111.1  
6660042,7,-56.90385883,0\C,57,1.53920998,7,111.49155062,6,-178.8214394  
3,0\H,78,1.10332777,57,109.38096409,7,-177.60530231,0\H,78,1.10054542,  
57,111.29733655,7,-58.31545091,0\H,78,1.09940002,57,111.86677269,7,62.  
59265705,0\C,58,1.55026315,10,107.75132592,9,-60.26328514,0\H,82,1.103  
09443,58,109.70833541,10,177.50239271,0\H,82,1.10243532,58,110.8420703  
5,10,-63.61364538,0\H,82,1.10044165,58,111.34246701,10,57.19699957,0\C  
,58,1.53877292,10,111.14179209,9,179.4660089,0\H,86,1.10038153,58,111.  
08564201,10,59.79769411,0\H,86,1.10362322,58,109.36376441,10,179.15323  
304,0\H,86,1.09866251,58,112.00113153,10,-60.31354388,0\H,59,1.1023553  
,57,107.69199049,7,65.86081657,0\C,26,2.26375724,15,105.39947995,11,-1  
31.12273909,0\C,26,2.4941965,15,136.29601169,11,135.66793586,0\H,91,1.  
09056766,26,96.72299915,15,85.70014911,0\H,91,1.0941944,26,88.5803552,  
15,-30.20900322,0\H,92,1.10030876,26,89.59624176,15,-159.51114535,0\H,

92,1.10034404,26,137.62756608,15,-43.30969618,0\C,26,1.38185697,15,106  
.48134377,11,123.54549517,0\H,40,1.09934386,38,111.80446338,4,61.28451  
815,0\C,39,1.54074423,13,110.67077386,12,2.42706818,0\H,99,1.10344082,  
39,109.30801371,13,178.42863741,0\H,99,1.09934831,39,111.76040263,13,-  
61.40323179,0\H,99,1.10051141,39,111.11832932,13,59.0765804,0\C,54,1.5  
1684308,38,115.72139289,4,-55.97529612,0\C,103,1.40601763,54,119.30425  
932,38,84.94564664,0\C,103,1.40838208,54,122.50639331,38,-94.68041111,  
0\C,104,1.40607479,103,122.50310823,54,-177.52408865,0\H,104,1.0917701  
6,103,118.67827905,54,1.99374836,0\C,105,1.4030923,103,120.29211132,54  
,179.01515246,0\H,105,1.09459277,103,119.80278785,54,-1.78156252,0\C,1  
08,1.40297581,105,120.50797255,103,-0.7241493,0\H,108,1.09409251,105,1  
19.74247724,103,179.05818079,0\H,110,1.09458235,108,119.83111366,105,1  
79.83918708,0\C,92,1.55058446,26,100.66115709,15,90.57721725,0\H,113,1  
.10447584,92,109.19857092,26,158.6531672,0\H,113,1.10462007,92,108.989  
87101,26,-84.94084212,0\C,91,1.49197292,26,106.90396035,15,-150.059100  
13,0\H,116,1.10083246,91,109.26566139,26,-81.29874786,0\H,116,1.114495  
8,91,108.29182955,26,163.02891643,0\\Version=EM64L-G09RevA.01\State=3-  
A\HF=-2818.0808747\S2=2.013036\S2-1=0.\S2A=2.000065\RMSD=7.328e-09\Dip  
ole=1.4357657,-0.1422407,0.2146352\Quadrupole=5.4128405,10.206123,-15.  
6189635,-6.6011312,1.9653653,-1.4472861\PG=C01 [X(C50H57N1O8Rh2)]\@

### **<sup>3</sup>TS19**

1\1\GINC-SHI\_02\FTS\UBPW91\GenECP\C50H57N1O8Rh2(3)\YIN\19-Jul-2016\0\\  
#p genecp bpw91 opt=(calcfc,ts,noeigen)\Title Card Required\0,3\Rh,1  
.5675357016,-1.8238733389,0.1487374538\Rh,0.0726863582,0.0696598387,0.  
091209848\O,0.5441270852,-2.9067429658,-1.2159683876\C,-0.5083753148,-  
2.4507232763,-1.813471731\O,-0.9965582452,-1.2950472776,-1.6372545721\  
O,2.6623678589,-0.9654360135,-1.3716954555\C,2.3223589087,0.1991643554  
,-1.8032267478\O,1.3190584951,0.8779202978,-1.3923300628\O,2.782839622  
7,-0.9921130264,1.5625921438\C,2.513073836,0.1703273111,2.0718339331\  
O,1.511128423,0.8733962422,1.7584006373\O,0.4367449133,-2.6529390731,1.  
6358777882\C,-0.6215605765,-2.0447298166,2.0364832044\O,-1.0526769403,  
-0.9226973067,1.5878182016\C,-0.6612254567,3.1273843734,0.0188020811\C  
,-1.7061806367,4.0925721394,-0.1829097602\C,0.6754439795,3.5543389677,  
0.1948765554\C,-2.9271069747,3.3480936177,-0.2902784373\C,-1.423459218  
5,5.4800434587,-0.1781434292\C,0.9288435122,4.923357249,0.1841329051\H  
,1.4662203311,2.8245942084,0.3602315875\C,-0.1054662764,5.8828788794,0  
.0043914782\H,-2.2259367942,6.2132181897,-0.2940097271\H,1.9551563441,  
5.2719147366,0.3306510764\H,0.1412499128,6.9479563067,0.0200311506\N,-  
1.1630898804,1.837886586,0.0246376477\C,-4.2850012139,3.9348512719,-0.  
1879332698\C,-4.6988386918,4.9575386218,-1.0720944127\C,-5.1648772734,  
3.5425619047,0.8451648324\C,-5.9597505479,5.553470111,-0.9393693841\H,  
-4.0283625051,5.2806794374,-1.8737781981\C,-6.4234506391,4.1434735186,  
0.9791574609\H,-4.848934121,2.7834728997,1.5640915694\C,-6.8277918582,  
5.1463442024,0.0851865426\H,-6.2638748449,6.3377686197,-1.6381685284\H

, -7.0877242915, 3.8295208076, 1.7890484934\H, -7.8117653698, 5.6116705327, 0.1889488668\C, -1.1884425395, -3.4239113056, -2.8130669818\C, -1.4378681534, -2.7159181063, 3.1654770082\C, -0.4422286615, -4.7687994367, -2.8921114139\H, -0.941206334, -5.4283328201, -3.6237104832\H, 0.599694913, -4.6229895453, -3.2152520321\C, -2.88977199, -3.0152322832, 2.645929413\H, -3.448664063, -3.4433659877, 3.4974591798\H, -3.3629662214, -2.0486274722, 2.4043351882\C, -1.5457903819, -1.7094594539, 4.338503147\H, -2.0149803124, -0.7683830415, 4.0141067872\H, -2.1507176536, -2.144450636, 5.1522883004\H, -0.5497214647, -1.4724220334, 4.7468938835\C, -1.1904153362, -2.7477722893, -4.2061620765\H, -1.6996686287, -3.3948206112, -4.9406881573\H, -1.7071997537, -1.7762202959, -4.1781662127\H, -0.1604201468, -2.5793347389, -4.5617882625\C, -2.6787697185, -3.6430567586, -2.3733696148\H, -3.1883564275, -2.6663188523, -2.4253202802\H, -3.146875487, -4.2912263692, -3.1359294165\C, 3.1968101451, 0.796265969, -2.9301837245\C, 3.5103746355, 0.6801275036, 3.1434475254\C, 4.7035193943, 0.7926674368, -2.4867727015\H, 5.27973324, 1.2323962234, -3.3206354987\C, 4.9645806998, 0.6885886176, 2.5513522468\H, 5.6280420512, 1.0899909353, 3.338684941\H, 5.2632911734, -0.3584179008, 2.3786179666\C, 5.1483544994, 1.4746260292, 1.2662822162\C, 5.5370975186, 2.8290710984, 1.2583272301\C, 4.9197168997, 0.8414086529, 0.0302897201\C, 5.6724038216, 3.5214449623, 0.0453736903\H, 5.7515556983, 3.3385158259, 2.2032851471\C, 5.0174946399, 1.5254103354, -1.1956058749\H, 4.6473608856, -0.216157099, 0.0235414298\C, 5.4069143887, 2.8794892957, -1.1736490244\H, 5.9947580002, 4.5673807016, 0.0496739915\H, 5.520135952, 3.4283264379, -2.1142062327\C, 3.0598648316, -0.1261597538, -4.1691096637\H, 2.0188223628, -0.1461859616, -4.5317820906\H, 3.6969099365, 0.2488313416, -4.9882925197\H, 3.3641399182, -1.1568347292, -3.9317602804\C, 2.7335515046, 2.2193399638, -3.2913028606\H, 3.3636602734, 2.6166390108, -4.1057001165\H, 1.6879973279, 2.2185736549, -3.6350092021\H, 2.8031183423, 2.9013180891, -2.4318481715\C, 3.4803709061, -0.3089569814, 4.3353801767\H, 4.2036002325, 0.0061819136, 5.1072371853\H, 2.4807560681, -0.3329754691, 4.8003889787\H, 3.735153738, -1.3294245222, 4.0115749693\C, 3.1071988765, 2.0857347141, 3.6257780953\H, 2.0909683028, 2.081509534, 4.0480733011\H, 3.8069392569, 2.4257265171, 4.4088740321\H, 3.1231499883, 2.816549604, 2.8043039218\H, 5.0218551168, -0.2583788977, -2.3923005708\H, -0.4242140044, -5.279527448, -1.9188424672\C, -0.754176468, -4.0087859649, 3.6479411841\H, -1.3446756426, -4.4536246773, 4.4675892353\H, -0.6669320909, -4.7487963342, 2.8398636257\H, 0.2584200689, -3.8025179532, 4.0267740733\C, -2.8837444296, -4.2472654962, -0.9961385513\C, -2.8366078361, -3.4288102184, 0.1477238958\C, -3.1275053601, -5.6231693504, -0.8179004841\C, -2.9906080852, -3.9424439289, 1.4485582134\H, -2.6643211277, -2.357846277, 0.0208051149\C, -3.306451148, -6.1538571487, 0.4680951277\H, -3.1883927544, -6.280202994, -1.6915075771\C, -3.2351764827, -5.3221189104, 1.5949906382\H, -3.5070647719, -7.2223233031, 0.592383458\H, -3.3797892415, -5.7437610529, 2.5948794617\C, -3.4341090303, 0.7448304923, -0.0117609665\C, -2.7915477469, 2.3058616359, -2.140913527\C, -2.5240901516, 1.9367206141, -0.1967914257\C, -4.3603315621, 0.6159526295, -1.2362213045\H, -4.0004521139, 0.828893121

4,0.9304151245\H,-2.7886169083,-0.1390902429,0.0790345046\H,-3.3902659  
768,3.152955308,-2.4965752414\H,-1.736661518,2.4179504756,-2.412982213  
8\H,-5.2026364379,1.3250511822,-1.167002819\H,-4.78394664,-0.397712669  
4,-1.3174403051\C,-3.458918572,0.967098438,-2.4320343687\H,-4.03539082  
06,1.0358259188,-3.3720968233\H,-2.6884510242,0.1870335476,-2.53804514  
5\\Version=EM64L-G09RevA.01\State=3-A\HF=-2817.3384723\S2=2.005743\S2-  
1=0.\S2A=2.000017\RMSD=3.288e-09\RMSF=5.401e-06\Dipole=-2.3601993,1.94  
46819,-0.6216829\Quadrupole=3.2438937,-1.2566645,-1.9872292,-6.609035,  
1.6554016,-5.1090333\PG=C01 [X(C50H57N108Rh2)]\@

## P5

1\1\GINC-SHI\_02\SP\RBPW91\GenECP\C50H57N108Rh2\YIN\13-Jul-2016\0\#\#p g  
enecp bpw91 geom=check scrf=(iefpcm,smd,solvent=chlorobenzene)\Title  
Card Required\0,1\Rh,0,-0.0119671457,-0.0128690569,-0.0274194342\Rh,0  
, -0.0076173104,-0.0507485764,2.3756806668\O,0,2.0296478747,0.021248280  
1,0.000049284\C,0,2.6362401105,-0.0020549025,1.1316654552\O,0,2.065165  
073,-0.0432127716,2.2855827262\O,0,0.045923792,-2.0629514771,-0.044470  
0485\C,0,0.0500212225,-2.6872166702,1.0782599326\O,0,0.0317736574,-2.1  
31629366,2.2370607856\O,0,-2.0715846053,-0.0309011749,0.025096534\C,0,  
-2.6618996169,-0.0758378989,1.1649602992\O,0,-2.0724884133,-0.08927674  
1,2.3086903173\O,0,-0.0416092339,2.0211570913,0.0178067654\C,0,-0.0318  
585649,2.6112726311,1.1583615305\O,0,-0.0356523656,2.0194220186,2.3016  
625237\C,0,-0.4829899064,1.3779777493,5.3501953812\C,0,0.6842526285,1.  
9175214931,5.9508387156\C,0,-1.6422223933,2.1350067288,5.1591139367\C,  
0,1.6362004995,0.8224692716,6.0983512306\C,0,0.712007048,3.2833889391,  
6.2938085483\C,0,-1.6128598558,3.4813292794,5.5547874394\H,0,-2.533941  
2562,1.7007286984,4.7034617749\C,0,-0.4435327391,4.0518679602,6.100399  
4841\H,0,1.6125724513,3.7313665452,6.721387714\H,0,-2.5083266754,4.096  
6306167,5.4301749317\H,0,-0.4415356649,5.1083459054,6.3836622468\N,0,-  
0.2612474413,0.0022648201,5.0651457662\C,0,2.9688178152,0.9038105391,6  
.7268897807\C,0,3.1463666457,1.6108150964,7.9399940009\C,0,4.096438056  
2,0.2678658085,6.1587137875\C,0,4.4010122033,1.675957611,8.5589200525\  
H,0,2.2830408558,2.0883380583,8.4109082722\C,0,5.3500492405,0.32845565  
13,6.7825766497\H,0,3.9839410313,-0.25913659,5.2079780304\C,0,5.509243  
8477,1.0337828881,7.9847595298\H,0,4.5113536103,2.2235365925,9.4997115  
154\H,0,6.2081503713,-0.1694691936,6.3212767281\H,0,6.4884146024,1.084  
8887277,8.4692487826\C,0,4.1817244386,-0.0113732535,1.1119813087\C,0,-  
0.0446598674,4.1562811602,1.1557723978\C,0,4.7113684456,0.0938274917,-  
0.3308671727\H,0,5.8142995268,0.061010499,-0.3182743359\H,0,4.34900240  
05,-0.7411017625,-0.9494548413\C,0,1.1279742431,4.6978379804,2.0485813  
42\H,0,1.0456921065,5.7994873911,2.0416261021\H,0,0.9477142921,4.36425  
76287,3.0830820072\C,0,-1.3846239635,4.6171225213,1.7834503417\H,0,-1.  
4944024286,4.234363231,2.8086072714\H,0,-1.4208690438,5.7194620087,1.8  
126314045\H,0,-2.2405012741,4.2681765843,1.1817024165\C,0,4.6542198995  
, -1.3470649616,1.7410305564\H,0,5.7564614389,-1.375682153,1.7739637418



\H,0,4.2704598835,-1.4639815725,2.7658214539\H,0,4.3126319354,-2.20807  
65075,1.1429736748\C,0,4.7305850767,1.1676628283,1.9925845791\H,0,4.43  
2830093,0.9816418048,3.0371287267\H,0,5.8328391067,1.103341471,1.95393  
54949\C,0,0.1049786041,-4.2307952837,0.9961208205\C,0,-4.2071793572,-0  
.0858491585,1.1385230343\C,0,-1.0698315686,-4.7455610086,0.0877617831\  
H,0,-0.9817780378,-5.8460488985,0.0503059592\C,0,-4.7079713693,-1.2523  
383861,0.2123460068\H,0,-5.8117653913,-1.2086616954,0.2176258257\H,0,-  
4.3799966002,-1.028464352,-0.8158992016\C,0,-4.2398484283,-2.642153814  
,0.5999303113\C,0,-5.0103645376,-3.4946793389,1.4152107135\C,0,-2.9883  
698924,-3.1023096083,0.1504785005\C,0,-4.5236949484,-4.7591952234,1.77  
90720868\H,0,-6.0003983268,-3.17338036,1.7546863976\C,0,-2.4634492901,  
-4.3489574792,0.5378556119\H,0,-2.3991532649,-2.4655672026,-0.51270445  
58\C,0,-3.2550602103,-5.1813546499,1.3539194204\H,0,-5.1382498236,-5.4  
211437323,2.3967012454\H,0,-2.883158309,-6.1687456649,1.6459522586\C,0  
,1.4442932955,-4.614982784,0.3153818068\H,0,2.3033748548,-4.3015308108  
,0.9314706025\H,0,1.4997681498,-5.7097559266,0.1916106715\H,0,1.537302  
3296,-4.144571675,-0.6750264423\C,0,0.0330782892,-4.8762885277,2.39101  
15356\H,0,0.1234177994,-5.9717154898,2.2936863761\H,0,0.8512939031,-4.  
522797498,3.0362603574\H,0,-0.919960433,-4.6550170282,2.8927820036\C,0  
, -4.6715010459,1.2558705742,0.5143847947\H,0,-5.7720477805,1.273675566  
4,0.4412110886\H,0,-4.360030588,2.1104013528,1.1374840981\H,0,-4.25042  
21689,1.3905650925,-0.4933775784\C,0,-4.7907271322,-0.2270569698,2.555  
8338105\H,0,-4.4696960437,0.6042612533,3.2017599117\H,0,-5.8927267346,  
-0.2103886083,2.5039421564\H,0,-4.4827193679,-1.1697959771,3.031263463  
5\H,0,-0.8936523311,-4.3709007714,-0.9337198233\C,0,-1.3905487877,-0.9  
296453741,5.3808987359\C,0,1.4517148684,-1.7497918381,5.6381241894\H,0  
, -2.1933562871,-0.7396194725,4.6559741805\H,0,-1.7594319757,-0.6653931  
858,6.3907130192\H,0,1.7246895736,-2.0894270687,4.6217964006\H,0,2.351  
3919287,-1.8400407631,6.2662662967\C,0,1.0244365603,-0.3141568857,5.60  
05942813\H,0,4.3972334806,1.0312013327,-0.8117661062\C,0,0.0650076061,  
4.6987784693,-0.2825577446\H,0,0.0395155702,5.8017698471,-0.2585476023  
\H,0,0.9996552615,4.3837934818,-0.7683988994\H,0,-0.7729763524,4.34902  
47707,-0.9041742021\C,0,4.2757952861,2.5540336158,1.5798541432\C,0,3.0  
316352907,3.0364972791,2.0260514366\C,0,5.0515942535,3.3778342456,0.74  
11446364\C,0,2.5183679259,4.2786969222,1.6106264727\H,0,2.440119802,2.  
4236664591,2.7095411088\C,0,4.5775837283,4.6393028442,0.3516314009\H,0  
,6.034221324,3.0351268719,0.4009869534\C,0,3.3154910099,5.0835628047,0  
.77271959\H,0,5.1948137544,5.2791710453,-0.2863071769\H,0,2.9502140805  
,6.0658099526,0.4560561344\C,0,0.3071091357,-2.6405181111,6.1723703726  
\H,0,0.6042223736,-3.7016827816,6.1226764226\H,0,0.1224870649,-2.40418  
63255,7.2367918137\C,0,-0.9627020703,-2.3989594151,5.3452187849\H,0,-0  
.7842552565,-2.6993252689,4.3024335701\H,0,-1.8051143644,-3.0016259659  
,5.7268462672\\Version=EM64L-G09RevA.01\State=1-A\HF=-2818.1810627\RMS  
D=6.279e-09\Dipole=-0.4836828,-1.0447542,0.7212553\Quadrupole=10.71622  
82,6.3348075,-17.0510357,-9.4649623,-3.46258,-5.0699645\PG=C01 [X(C50H

**P6**

```
l\1\GINC-A731\SP\RBPW91\GenECP\C50H57N108Rh2\SIOC001\30-Jun-2016\0\#\#p
  genecp bpw91 geom=check scrf=(iefpcm,smd,solvent=chlorobenzene)\Titl
e Card Required\0,1\rh,0,0.189199078,-2.5162332983,0.5313420912\rh,0,
0.0586199345,-0.2165841782,-0.2199918771\o,0,-1.1875263652,-3.02345556
81,-0.8858217625\c,0,-1.6471544051,-2.1203070757,-1.6685477515\o,0,-1.
3299058462,-0.8710839177,-1.6450308109\o,0,1.6784951157,-2.8414805918,
-0.8553102386\c,0,2.0459921755,-1.8625030481,-1.5997556631\o,0,1.56390
35391,-0.6710298539,-1.5648694636\o,0,1.5635248468,-1.9380806685,1.950
6348917\c,0,1.8948585559,-0.7000507014,2.0103710044\o,0,1.4420597128,0
.2340928536,1.2528799564\o,0,-1.2961115176,-2.1251800527,1.8740969469\
c,0,-1.8079548703,-0.9522039407,1.9248460337\o,0,-1.4669273382,0.05083
29856,1.1894223666\c,0,1.268617465,2.6953730933,-0.8313495927\c,0,0.96
53404892,4.064709661,-0.9848182752\c,0,2.5924135538,2.2458033384,-0.77
85441389\c,0,-0.5451216168,4.2005099822,-1.0450708779\c,0,1.9821969732
,5.0172656055,-1.0586036381\c,0,3.612373314,3.2084917664,-0.868724463\
h,0,2.8184695214,1.1866770978,-0.6736931927\c,0,3.31687361,4.576246555
3,-1.0020639779\h,0,1.7499387308,6.0819831475,-1.154144728\h,0,4.65433
2454,2.8801392297,-0.8283102436\h,0,4.1304519173,5.3046934988,-1.06280
20508\N,0,0.0655092458,1.9089057408,-0.7775440007\c,0,-1.0754475545,5.
0427312121,0.1341123056\c,0,-1.5616858816,6.353899735,-0.0250055726\c,
0,-1.0151161755,4.5082961464,1.4397126531\c,0,-1.9794055568,7.10714930
68,1.0846388898\h,0,-1.6206456508,6.8068969261,-1.0174157741\c,0,-1.43
31191587,5.2578572472,2.5462309046\h,0,-0.6294237146,3.49558981,1.5905
888512\c,0,-1.9199223135,6.5630072412,2.3738344305\h,0,-2.3536553386,8
.1239505323,0.9335585074\h,0,-1.3758080932,4.8201241481,3.5470601118\h
,0,-2.2475667189,7.1494320868,3.2367797117\c,0,-2.6610447201,-2.569803
3221,-2.7479850163\c,0,-2.922902459,-0.7172338929,2.972627548\c,0,-2.8
672186011,-4.0958028789,-2.696766571\h,0,-3.5680913577,-4.398504777,-3
.4937557352\h,0,-1.9175994563,-4.6299691259,-2.8518370252\c,0,-4.24653
11,-0.2772015553,2.2507327438\h,0,-5.0076818128,-0.1425714663,3.040051
2161\h,0,-4.0716234603,0.7148453497,1.8014904368\c,0,-2.4775575869,0.4
369076351,3.9045259429\h,0,-2.2828674625,1.3573843878,3.3342384016\h,0
,-3.2658955622,0.6438690349,4.6480744899\h,0,-1.5594632636,0.168394710
7,4.4527469978\c,0,-2.1052506176,-2.1618446018,-4.1348329062\h,0,-2.82
65662244,-2.4346255561,-4.9237917763\h,0,-1.9197875072,-1.0785218016,-
4.187044288\h,0,-1.1581905229,-2.6839045734,-4.3491381774\c,0,-4.02847
61453,-1.8261284172,-2.5330858852\h,0,-3.8652249846,-0.7542697952,-2.7
364273758\h,0,-4.7172300083,-2.1986161005,-3.3123975089\c,0,3.15766462
01,-2.1553131733,-2.634581635\c,0,2.919989827,-0.3109172913,3.10095132
61\c,0,4.4223899518,-2.7137453083,-1.8870478578\h,0,5.1919326003,-2.89
67487018,-2.6582714441\c,0,4.2229687247,-1.1707123916,2.9139565985\h,0
,4.927394485,-0.8542793419,3.7039454338\h,0,3.9613823026,-2.2227672694
```

,3.1145978244\C,0,4.8872804458,-1.0729729301,1.553716777\C,0,5.9233507  
414,-0.1563387779,1.2862251543\C,0,4.456864871,-1.9145626004,0.5105952  
917\C,0,6.4905260776,-0.0804133102,0.0049417452\H,0,6.2972316472,0.489  
029356,2.0874773887\C,0,4.9834609034,-1.8265820446,-0.7918331383\H,0,3  
.6807900519,-2.6549845815,0.7168742969\C,0,6.0183406909,-0.9007674926,  
-1.0310790186\H,0,7.3106947207,0.6185888513,-0.1859851547\H,0,6.467056  
7126,-0.8333919538,-2.0273653355\C,0,2.6380502714,-3.2606265162,-3.589  
1038135\H,0,1.765245657,-2.9069607857,-4.1625770849\H,0,3.4269699839,-  
3.5337864987,-4.31034298\H,0,2.3441982349,-4.1623402605,-3.031059412\C  
,0,3.511115956,-0.8960322993,-3.4469222864\H,0,4.2818034961,-1.1466631  
088,-4.1960003778\H,0,2.6293042077,-0.5059824599,-3.9773989337\H,0,3.8  
997498797,-0.0908635756,-2.8073396852\C,0,2.3059267516,-0.6692163296,4  
.4782297888\H,0,3.0321174097,-0.4520357334,5.2799168952\H,0,1.40054418  
4,-0.0706756041,4.6723849962\H,0,2.0346480494,-1.7344560867,4.52839084  
29\C,0,3.2428142119,1.1934352744,3.0537416871\H,0,2.3355552567,1.79723  
63063,3.2071059186\H,0,3.9602157902,1.4409245117,3.8549929649\H,0,3.68  
01251063,1.4898573777,2.0899848641\H,0,4.1525865099,-3.6931006656,-1.4  
588709242\H,0,-3.2780406185,-4.4173007632,-1.7289927392\C,0,-3.1642949  
533,-1.9922944103,3.8037885852\H,0,-3.9438532657,-1.7936889009,4.55940  
35156\H,0,-3.4935312667,-2.8311689078,3.1741154019\H,0,-2.2484194832,-  
2.3052579899,4.3275963838\C,0,-4.6572471544,-1.9816343495,-1.161383985  
2\C,0,-4.2636752372,-1.1166257761,-0.1258593962\C,0,-5.6246323643,-2.9  
638724094,-0.8726509982\C,0,-4.7642412052,-1.2224381313,1.1830608107\H  
,0,-3.5328269275,-0.3366844685,-0.3431997968\C,0,-6.1597930287,-3.0715  
503955,0.4202538388\H,0,-5.9690878286,-3.6377523688,-1.6635121812\C,0,  
-5.7306336066,-2.2132488878,1.4443736151\H,0,-6.9208660952,-3.82892983  
45,0.6308210204\H,0,-6.1578536699,-2.3059171716,2.4480198482\C,0,-0.95  
09315289,2.7281495714,-0.911760975\C,0,-2.3799358853,2.3476249181,-1.0  
975033449\C,0,-1.0461249413,4.6621439439,-2.4507180301\C,0,-2.87432007  
37,2.8942729139,-2.4678512341\H,0,-2.9856758833,2.8004037454,-0.290846  
0385\H,0,-2.4894552379,1.2582517764,-1.045708814\H,0,-0.8014907385,5.7  
261701991,-2.6080969349\H,0,-0.4676172503,4.1019432165,-3.2068995139\H  
,0,-3.9606597847,2.7213712158,-2.5521753\H,0,-2.3914818235,2.311586059  
8,-3.272895376\C,0,-2.5489619718,4.387370553,-2.6485509863\H,0,-3.1386  
312048,4.9858784682,-1.931693435\H,0,-2.8489815653,4.7157392927,-3.659  
1957279\\Version=ES64L-G09RevD.01\State=1-A\HF=-2818.1895144\RMSD=8.23  
6e-09\Dipole=-0.758495,2.3440239,-0.727732\Quadrupole=-5.3788624,-1.38  
80598,6.7669222,-2.6155087,-0.1364475,2.5956094\PG=C01 [X(C50H57N108Rh  
2)]\@

## 5a

1\1\GINC-SHI\_02\SP\RBPW91\6-311++G(d,p)\C18H17N1\YIN\21-Sep-2016\0\#p  
bpw91/6-311++G(d,p) scrf=(iefpcm,smd,solvent=chlorobenzene)\Title Ca  
rd Required\0,1\C\C,1,1.41624052\C,2,1.39418094,1,120.61361756\C,3,1.  
40888557,2,118.41148151,1,-0.75300513,0\C,4,1.40588353,3,120.82513327,

2,0.40056208,0\C,1,1.39961049,2,121.19307137,3,0.70565008,0\C,1,2.1834  
1741,6,161.28899169,5,179.2605042,0\C,2,1.52287894,1,106.91172779,6,-1  
79.90296662,0\H,3,1.0942911,2,121.21714959,1,178.77022163,0\H,4,1.0937  
3401,3,119.54709749,2,-179.82496067,0\H,5,1.09388191,4,119.50963353,3,  
179.85126388,0\H,6,1.09287183,1,120.36766536,2,179.71930556,0\N,7,1.30  
286084,1,38.72787411,6,1.78478129,0\C,8,1.53855203,2,111.45095235,1,-1  
19.13904163,0\C,14,1.40740072,8,122.94623535,2,-108.1477619,0\C,14,1.4  
1184938,8,118.98977528,2,69.11080899,0\C,15,1.40436188,14,120.93735373  
,8,177.58228435,0\H,15,1.0925969,14,120.37620581,8,-2.3475547,0\C,16,1  
.3997542,14,121.15660336,8,-177.78164992,0\H,16,1.09426088,14,119.2503  
5617,8,1.79999012,0\C,17,1.40041552,15,120.40499597,14,0.00616008,0\H,  
17,1.09407127,15,119.43880938,14,179.93896797,0\H,19,1.0939457,16,119.  
58626501,14,-179.90438781,0\H,21,1.0936227,17,120.36497206,15,179.8137  
1818,0\C,7,1.49596006,1,162.76494874,6,21.68878844,0\C,25,2.5621461,7,  
85.91796685,1,126.4145561,0\C,26,1.5426328,25,90.23164138,7,-2.2424702  
3,0\H,25,1.10082489,7,109.97436452,1,-21.31054831,0\H,25,1.1061123,7,1  
09.64423433,1,-140.18840015,0\H,26,1.1042799,25,143.88800365,7,-126.40  
659418,0\H,26,1.10461114,25,94.20922241,7,107.61183957,0\H,27,1.104497  
3,26,109.34793728,25,-87.96133844,0\H,27,1.10334867,26,111.42066543,25  
,155.23683019,0\C,26,1.53990485,25,34.31057305,7,-133.10537504,0\H,34,  
1.10520241,26,109.41950908,25,120.31071686,0\H,34,1.10345847,26,110.47  
081998,25,-122.24672856,0\Version=EM64L-G09RevA.01\State=1-A\HF=-751.  
0133886\RMSD=5.077e-09\Dipole=-0.5808071,-0.2412194,1.3207511\Quadrupo  
le=2.3951515,0.4705216,-2.8656731,0.783537,-1.1600626,-1.5987802\PG=C0  
1 [X(C18H17N1)]\@

## 5a'

1\1\GINC-SHI\_02\SP\RBPW91\6-311++G(d,p)\C18H17N1\YIN\21-Sep-2016\0\#\#p  
bpw91/6-311++G(d,p) scrf=(iefpcm,smd,solvent=chlorobenzene)\Title Ca  
rd Required\0,1\C\C,1,1.4291763\C,2,1.41131229,1,118.58716456\C,3,1.3  
9760292,2,119.19671373,1,-1.72942465,0\C,4,1.41413489,3,121.18186281,2  
,0.36169231,0\C,5,1.39903794,4,121.02275214,3,0.71428077,0\C,1,2.26775  
121,6,165.37733543,5,-179.83340554,0\C,7,1.39594043,1,74.14115639,6,17  
8.81107526,0\H,3,1.09315553,2,120.36816175,1,177.82701357,0\H,4,1.0937  
6911,3,119.49847059,2,-179.82211596,0\H,5,1.09359727,4,119.62254743,3,  
-179.66202633,0\H,6,1.09337655,5,120.82101981,4,179.4071635,0\C,8,1.47  
41545,7,126.71325862,1,-178.98229361,0\C,13,1.41577882,8,120.51578126,  
7,135.73330099,0\C,13,1.41445673,8,121.80012149,7,-44.17015035,0\C,14,  
1.40009056,13,121.1237057,8,-179.87159649,0\H,14,1.09329154,13,119.062  
41738,8,-1.37460376,0\C,15,1.40116868,13,121.16393803,8,179.40046108,0  
\H,15,1.0933831,13,119.2461501,8,-2.43224338,0\C,18,1.40259181,15,120.  
35125632,13,0.59932368,0\H,16,1.09430857,14,119.55959003,13,179.746736  
46,0\H,18,1.09434844,15,119.56836942,13,179.75856814,0\H,20,1.0937397,  
18,120.35426388,15,179.63695225,0\N,1,1.38871787,6,129.83144056,5,178.  
55087494,0\C,24,1.46274975,1,124.46294558,6,10.21094755,0\C,7,1.504586

42,1,155.17747532,24,3.01487942,0\H,26,1.10249162,7,109.25696988,1,146  
.14816013,0\H,26,1.10831417,7,110.00676312,1,-97.90874821,0\H,25,1.107  
51095,24,108.99536599,1,66.39090492,0\H,25,1.10331971,24,108.55894307,  
1,-50.1106671,0\C,26,1.54105996,7,111.77606424,1,22.28423695,0\H,31,1.  
10261216,26,109.84868633,7,-172.02165499,0\H,31,1.10543858,26,110.0432  
0246,7,70.41334625,0\C,25,1.53429197,24,111.36796215,1,-172.24552322,0  
\H,34,1.10514333,25,109.74828043,24,74.54364464,0\H,34,1.10269865,25,1  
08.47983907,24,-168.81586721,0\\Version=EM64L-G09RevA.01\State=1-A\HF=  
-751.0364487\RMSD=6.906e-09\Dipole=-1.2279465,-0.0619131,-1.3829535\Qu  
adrupole=-1.006802,-7.6417244,8.6485264,-3.2470462,2.7564202,-0.773176  
9\PG=C01 [X(C18H17N1)]\@

**The total energies, enthalpies and free energies of the lowest conformers of all species shown in Scheme 9 and archive entries**

Table S7<sup>a</sup>

|               | $E_{\text{tot}} (E_h)$ | $H_{298, \text{PhCl}}$ | $G_{298, \text{PhCl}}$ | # of imaginary frequencies       |
|---------------|------------------------|------------------------|------------------------|----------------------------------|
| <b>IN10-1</b> | -750.9788892           | -750.6691195           | -750.7281315           | 0                                |
| <b>TS14-1</b> | -750.9197341           | -750.6104334           | -750.6692894           | 1<br>(-589.32 $\text{cm}^{-1}$ ) |
| <b>TS15-1</b> | -750.9556516           | -750.6458573           | -750.7031483           | 1<br>(-460.91 $\text{cm}^{-1}$ ) |

**IN10-1**

```
1\1\GINC-SHI_02\SP\RBPW91\6-311++G(d,p)\C18H17N1\YIN\04-Jan-2017\0\#p
bpw91/6-311++G(d,p) geom=check scrf=(iefpcm,smd,solvent=chlorobenzene)
\\TitleCard Required\\0,1\C,0,-0.0251115143,0.0230163562,0.038430673
2\C,0,0.009932532,0.0213210747,1.5156266063\C,0,1.2186688303,0.0006502
249,-0.6975363297\C,0,-1.3072052461,0.0302565467,1.9416862321\C,0,1.27
16984093,-0.0285187263,2.2034506377\C,0,2.3949377802,-0.0314135363,0.0
075508896\H,0,1.1939371468,0.0057569465,-1.7899469273\C,0,2.4249129425
,-0.0524316324,1.4568457729\H,0,1.3050699134,-0.0595671399,3.295965444
4\H,0,3.3488902702,-0.0514196265,-0.5283867372\H,0,3.3970952085,-0.096
7263883,1.9561344722\N,0,-1.239759848,0.047172252,-0.466801337\C,0,-1.
7455448306,0.0897676285,3.3471129497\C,0,-1.2006811866,1.0750039948,4.
2085980195\C,0,-2.6733624481,-0.8276401041,3.8973318402\C,0,-1.5731689
693,1.1441852216,5.5566127059\H,0,-0.497972768,1.8052103711,3.79840545
08\C,0,-3.0384831242,-0.7606337664,5.2474417459\H,0,-3.0862014633,-1.6
187636795,3.2681724539\C,0,-2.4936194027,0.2261488099,6.0833691633\H,0
,-1.1453081121,1.9216490517,6.1963926107\H,0,-3.7489285899,-1.48853708
16,5.6500914958\H,0,-2.7839740571,0.2781821287,7.1364020331\C,0,-2.162
8997776,0.0750893696,0.6704537186\C,0,-3.261517766,-1.0353125981,0.508
7972194\C,0,-3.0322446064,1.3830472803,0.5969523139\C,0,-4.6056373885,
-0.4444822959,1.0275354396\H,0,-2.9680168692,-1.9748809291,1.001205847
2\H,0,-3.3193781301,-1.2454857007,-0.5697350955\H,0,-2.4983326283,2.26
2776304,0.9888813778\H,0,-3.2357617326,1.558592439,-0.4719878195\H,0,-
4.982139946,-0.9817800872,1.912674731\H,0,-5.380188524,-0.5413192001,0
.2490248601\C,0,-4.3273376977,1.0469345821,1.3534824701\H,0,-4.1821158
613,1.180797934,2.437304922\H,0,-5.1560668448,1.7100679169,1.054659468
6\\Version=EM64L-G09RevA.01\State=1-A\HF=-750.9788892\RMSD=4.430e-09\D
ipole=-0.1448389,0.0675138,1.3638383\Quadrupole=6.5617664,-3.5286561,-
3.0331103,2.6889548,-1.4851567,0.6426493\PG=C01 [X(C18H17N1)]\@
```

**TS14-1**

```
1\1\GINC-LOCALHOST\SP\RBPW91\6-311++G(d,p)\C18H17N1\YIN\06-Jan-2017\0\
\#p bpw91/6-311++g(d,p) geom=check scrf=(iefpcm,smd,solvent=ChloroBenz
ene)\Title Card Required\0,1\C,0,2.2000746494,-0.1358819219,-0.31693
96364\C,0,1.0401013799,-0.9867252924,-0.1464583895\C,0,3.516070752,-0.
6681844339,-0.255001121\C,0,-0.1035848874,-0.1495434038,-0.2614986116\
C,0,1.2260941722,-2.3831775268,0.0520494911\C,0,3.662571381,-2.0327881
396,-0.0592227133\H,0,4.3783213969,-0.0073573843,-0.3805820984\C,0,2.5
212438549,-2.8810500727,0.0908322272\H,0,0.36622936,-3.0489710097,0.16
82032169\H,0,4.6618692252,-2.4758624555,-0.0237022886\H,0,2.679812026,
-3.9537190685,0.2391914361\N,0,1.8551494185,1.1628864597,-0.5368332435
\C,0,-1.5152194812,-0.5684097089,-0.1181088109\C,0,-1.9427056067,-1.24
31890923,1.0501152201\C,0,-2.4715802375,-0.3436573215,-1.1355754182\C,
0,-3.2718710331,-1.659966437,1.2016989263\H,0,-1.2182177603,-1.4302977
337,1.8482537273\C,0,-3.8025895995,-0.7535325449,-0.9815029439\H,0,-2.
1552638863,0.1252206145,-2.0714884671\C,0,-4.2101640033,-1.4113148675,
0.1888775143\H,0,-3.5765078243,-2.1771484286,2.1166535082\H,0,-4.52110
50707,-0.5718354417,-1.7865052895\H,0,-5.2484421225,-1.7343427547,0.30
69522711\C,0,1.148073339,2.0155635669,1.2290792418\C,0,-0.3370529417,2
.3854750388,-0.9828567849\H,0,2.1846422705,1.8793490899,1.5438461957\H
,0,0.4596578635,1.4345020139,1.8552608483\H,0,0.2762941841,2.836264353
3,-1.7806215148\H,0,-1.2951234934,2.0829174309,-1.4278281746\C,0,0.411
4557251,1.1716600205,-0.4564043188\C,0,-0.5639620992,3.4164438361,0.14
88408367\H,0,-0.8336915501,4.4091249079,-0.2473660253\H,0,-1.397641652
1,3.080972023,0.7909311175\C,0,0.7357460317,3.4386293292,0.9571656171\
H,0,1.5364876831,3.9544125484,0.4019720837\H,0,0.6102215364,3.96444180
69,1.924073371\Version=EM64L-G09RevA.01\State=1-A\HF=-750.9197341\RMS
D=2.278e-09\Dipole=-0.7500694,1.0241963,0.9390495\Quadrupole=-1.101749
7,3.5955639,-2.4938143,0.1279132,3.7359197,-0.0790573\PG=C01 [X(C18H17
N1)]\@
```

### TS15-1

```
1\1\GINC-SHI_02\SP\RBPW91\6-311++G(d,p)\C18H17N1\YIN\05-Jan-2017\0\#p
bpw91/6-311++G(d,p) geom=check scrf=(iefpcm,smd,solvent=chlorobenzene
)\Title Card Required\0,1\C,0,2.3290924254,0.1957363345,-0.338902187
3\C,0,1.2811352136,-0.7297515855,0.0331107176\C,0,3.6828583743,-0.2336
153849,-0.3241917241\C,0,0.058447092,0.0034464823,-0.1022422572\C,0,1.
5874066346,-2.0714364838,0.3723075716\C,0,3.9560057678,-1.5518267454,0
.0184483631\H,0,4.4772616757,0.4671973446,-0.5935092407\C,0,2.91897033
51,-2.4695166017,0.3579081576\H,0,0.7948357143,-2.783312794,0.62056056
52\H,0,4.9924566877,-1.9033978012,0.0220475995\H,0,3.1802581803,-3.502
0171522,0.6063748508\N,0,1.8590157856,1.4353469936,-0.669305944\C,0,-1
.2983552914,-0.5881342128,-0.0988068202\C,0,-1.7210028045,-1.404742337
3,0.9765728149\C,0,-2.1859739536,-0.4007342837,-1.1818106283\C,0,-2.98
72047546,-2.0032386756,0.9727772932\H,0,-1.0493606895,-1.5609991796,1.
8256500024\C,0,-3.4518915209,-1.0009818019,-1.1850776729\H,0,-1.867750
```

3386,0.1946552651,-2.0404743189\C,0,-3.8592162121,-1.8016752809,-0.107  
5430021\H,0,-3.2937715643,-2.627913763,1.8167599043\H,0,-4.1197591017,  
-0.8474213453,-2.037589954\H,0,-4.8480203154,-2.2686842307,-0.11169916  
06\C,0,-0.3488869657,2.505123792,-1.0353646027\C,0,0.1162987224,1.4744  
643453,1.4370441534\C,0,0.5017001906,1.3616750007,-0.516331369\C,0,-1.  
2435121148,3.0452839327,0.1003622428\H,0,-0.9398190172,2.2064201037,-1.  
.9171772042\H,0,0.3616429621,3.2790243491,-1.366007494\H,0,-0.62668158  
31,0.8293079261,1.9234128708\H,0,1.1220543677,1.3086867616,1.836506042  
4\H,0,-2.1512880879,2.4261203342,0.2072540078\H,0,-1.570076276,4.08152  
47953,-0.0861827481\C,0,-0.3712445007,2.9176153376,1.3590049627\H,0,-0.  
.9292078268,3.1764850449,2.2774516418\H,0,0.4929867896,3.5982545162,1.  
2768315662\\Version=EM64L-G09RevA.01\State=1-A\HF=-750.9556516\RMSD=3.  
821e-09\Dipole=-1.9627415,-0.0963707,0.9132661\Quadrupole=-0.1624415,1.  
.1129968,-0.9505554,-3.1080937,3.3132961,-0.8763584\PG=C01 [X(C18H17N1  
)]\@
